# Supplementary material for: Optimizing use of multi-antibody assays for Lyme disease diagnosis: A bioinformatic approach
Source: PLoS One. 2021 Sep 9;16(9):e0253514. doi: 10.1371/journal.pone.0253514 (PMC8428682; doi:10.1371/journal.pone.0253514)
Supplement: S1 Data — (XLS) [file pone.0253514.s001.xls]

## Sheet: Serologic Data
ID1	VIDAS1	Mbands	MBlotPN1	GBands	GBlotPN1	Tier2PN1	samptype	ID1	Status1	Class1	VlsE30G2	vlse3Ng2	VlsE10G2	vlse1Ng2	C610G2	c61Neg2	PepC10M2	pepc1Ng2	VlsE10M2	vls1Ngm2	Tier2PN1	ID1	Lab1	Status1	Class1	VIDAS1	Reading1	GBlotPN1	G93	G66	G58	G45	G41	G39	G30	G28	G23	G18	MBlotPN1	M41	M39	M23	Tier2PN1
NIH 11								NIH 11	NoLyme	AnticardiolipinAntibodies	20.1149	Neg	21.7735	Neg	5.86886	Neg	8.21782	Neg	7.23781	Neg	Neg	NIH 11	NIH	NoLyme	AnticardiolipinAntibodies	Neg	0.31	#NULL!	#NULL!	#NULL!	#NULL!	#NULL!	#NULL!	#NULL!	#NULL!	#NULL!	#NULL!	#NULL!	#NULL!	#NULL!	#NULL!	#NULL!	0
NIH 22								NIH 22	NoLyme	AnticardiolipinAntibodies	17.9332	Neg	19.887	Neg	5.37678	Neg	9.73007	Neg	6.25518	Neg	Neg	NIH 22	NIH	NoLyme	AnticardiolipinAntibodies	Neg	0.28	#NULL!	#NULL!	#NULL!	#NULL!	#NULL!	#NULL!	#NULL!	#NULL!	#NULL!	#NULL!	#NULL!	#NULL!	#NULL!	#NULL!	#NULL!	0
NIH 27								NIH 27	NoLyme	AnticardiolipinAntibodies	8.228	Neg	10.769	Neg	-3.11992	Neg	8.79752	Neg	4.13876	Neg	Neg	NIH 27	NIH	NoLyme	AnticardiolipinAntibodies	Neg	0.18	#NULL!	#NULL!	#NULL!	#NULL!	#NULL!	#NULL!	#NULL!	#NULL!	#NULL!	#NULL!	#NULL!	#NULL!	#NULL!	#NULL!	#NULL!	0
NIH 3								NIH 3	NoLyme	AnticardiolipinAntibodies	10.4906	Neg	12.5769	Neg	-0.856323	Neg	10.2089	Neg	4.08837	Neg	Neg	NIH 3	NIH	NoLyme	AnticardiolipinAntibodies	Neg	0.68	#NULL!	#NULL!	#NULL!	#NULL!	#NULL!	#NULL!	#NULL!	#NULL!	#NULL!	#NULL!	#NULL!	#NULL!	#NULL!	#NULL!	#NULL!	0
NIH 33								NIH 33	NoLyme	AnticardiolipinAntibodies	16.6241	Neg	18.4693	Neg	3.27721	Neg	16.0311	Neg	4.52614	Neg	Neg	NIH 33	NIH	NoLyme	AnticardiolipinAntibodies	Neg	0.18	#NULL!	#NULL!	#NULL!	#NULL!	#NULL!	#NULL!	#NULL!	#NULL!	#NULL!	#NULL!	#NULL!	#NULL!	#NULL!	#NULL!	#NULL!	0
NIH 36								NIH 36	NoLyme	AnticardiolipinAntibodies	22.4157	Neg	24.4204	Neg	7.44354	Neg	4.36159	Neg	3.12737	Neg	Neg	NIH 36	NIH	NoLyme	AnticardiolipinAntibodies	Neg	0.3	#NULL!	#NULL!	#NULL!	#NULL!	#NULL!	#NULL!	#NULL!	#NULL!	#NULL!	#NULL!	#NULL!	#NULL!	#NULL!	#NULL!	#NULL!	0
NIH 4								NIH 4	NoLyme	AnticardiolipinAntibodies	14.4247	Neg	16.2712	Neg	7.41074	Neg	10.1333	Neg	4.08837	Neg	Neg	NIH 4	NIH	NoLyme	AnticardiolipinAntibodies	Neg	0.68	#NULL!	#NULL!	#NULL!	#NULL!	#NULL!	#NULL!	#NULL!	#NULL!	#NULL!	#NULL!	#NULL!	#NULL!	#NULL!	#NULL!	#NULL!	0
NIH 40								NIH 40	NoLyme	AnticardiolipinAntibodies	15.527	Neg	17.2164	Neg	-3.11992	Neg	5.97465	Neg	2.66111	Neg	Neg	NIH 40	NIH	NoLyme	AnticardiolipinAntibodies	Neg	0.03	#NULL!	#NULL!	#NULL!	#NULL!	#NULL!	#NULL!	#NULL!	#NULL!	#NULL!	#NULL!	#NULL!	#NULL!	#NULL!	#NULL!	#NULL!	0
NIH 41								NIH 41	NoLyme	AnticardiolipinAntibodies	15.8617	Neg	17.8428	Neg	0.0113477	Neg	5.04896	Neg	2.88053	Neg	Neg	NIH 41	NIH	NoLyme	AnticardiolipinAntibodies	Neg	0.06	#NULL!	#NULL!	#NULL!	#NULL!	#NULL!	#NULL!	#NULL!	#NULL!	#NULL!	#NULL!	#NULL!	#NULL!	#NULL!	#NULL!	#NULL!	0
NIH 44								NIH 44	NoLyme	AnticardiolipinAntibodies	15.5911	Neg	17.5296	Neg	-0.890992	Neg	21.0025	Neg	5.04726	Neg	Neg	NIH 44	NIH	NoLyme	AnticardiolipinAntibodies	Neg	0.13	#NULL!	#NULL!	#NULL!	#NULL!	#NULL!	#NULL!	#NULL!	#NULL!	#NULL!	#NULL!	#NULL!	#NULL!	#NULL!	#NULL!	#NULL!	0
NIH 45								NIH 45	NoLyme	AnticardiolipinAntibodies	12.6781	Neg	15.0733	Neg	5.23451	Neg	10.7537	Neg	9.27354	Neg	Neg	NIH 45	NIH	NoLyme	AnticardiolipinAntibodies	Neg	0.26	#NULL!	#NULL!	#NULL!	#NULL!	#NULL!	#NULL!	#NULL!	#NULL!	#NULL!	#NULL!	#NULL!	#NULL!	#NULL!	#NULL!	#NULL!	0
NIH 52								NIH 52	NoLyme	AnticardiolipinAntibodies	8.46511	Neg	11.0104	Neg	-0.717465	Neg	7.56794	Neg	6.02184	Neg	Neg	NIH 52	NIH	NoLyme	AnticardiolipinAntibodies	Neg	0.16	#NULL!	#NULL!	#NULL!	#NULL!	#NULL!	#NULL!	#NULL!	#NULL!	#NULL!	#NULL!	#NULL!	#NULL!	#NULL!	#NULL!	#NULL!	0
NIH 60								NIH 60	NoLyme	AnticardiolipinAntibodies	10.5648	Neg	12.7158	Neg	-0.884858	Neg	5.96232	Neg	3.74894	Neg	Neg	NIH 60	NIH	NoLyme	AnticardiolipinAntibodies	Neg	0.04	#NULL!	#NULL!	#NULL!	#NULL!	#NULL!	#NULL!	#NULL!	#NULL!	#NULL!	#NULL!	#NULL!	#NULL!	#NULL!	#NULL!	#NULL!	0
NIH 62								NIH 62	NoLyme	AnticardiolipinAntibodies	6.94072	Neg	9.38061	Neg	-0.0492257	Neg	15.8245	Neg	5.03362	Neg	Neg	NIH 62	NIH	NoLyme	AnticardiolipinAntibodies	Neg	0.11	#NULL!	#NULL!	#NULL!	#NULL!	#NULL!	#NULL!	#NULL!	#NULL!	#NULL!	#NULL!	#NULL!	#NULL!	#NULL!	#NULL!	#NULL!	0
NIH 8								NIH 8	NoLyme	AnticardiolipinAntibodies	7.43687	Neg	9.90436	Neg	-1.57805	Neg	6.70557	Neg	3.53407	Neg	Neg	NIH 8	NIH	NoLyme	AnticardiolipinAntibodies	Neg	0.05	#NULL!	#NULL!	#NULL!	#NULL!	#NULL!	#NULL!	#NULL!	#NULL!	#NULL!	#NULL!	#NULL!	#NULL!	#NULL!	#NULL!	#NULL!	0
500								500	NoLyme	AntinuclearAntibodies	3.20873	Neg	2.9662	Neg	-4.3112	Neg	6.30344	Neg	3.3628	Neg	Neg	500	CDC	NoLyme	AntiNuclearAntibodies	Neg	0.23	#NULL!	#NULL!	#NULL!	#NULL!	#NULL!	#NULL!	#NULL!	#NULL!	#NULL!	#NULL!	#NULL!	#NULL!	#NULL!	#NULL!	#NULL!	0
501								501	NoLyme	AntinuclearAntibodies	3.62109	Neg	3.21917	Neg	-3.97796	Neg	8.08264	Neg	1.5454	Neg	Neg	501	CDC	NoLyme	AntiNuclearAntibodies	Equiv	0.93	0	1	0	0	0	1	0	1	0	0	0	0	1	0	0	0
502								502	NoLyme	AntinuclearAntibodies	4.41442	Neg	3.99614	Neg	-3.52571	Neg	5.29303	Neg	1.84536	Neg	Neg	502	CDC	NoLyme	AntiNuclearAntibodies	Neg	0.21	#NULL!	#NULL!	#NULL!	#NULL!	#NULL!	#NULL!	#NULL!	#NULL!	#NULL!	#NULL!	#NULL!	#NULL!	#NULL!	#NULL!	#NULL!	0
503								503	NoLyme	AntinuclearAntibodies	4.82334	Neg	4.64663	Neg	-3.66853	Neg	4.96354	Neg	0.857257	Neg	Neg	503	CDC	NoLyme	AntiNuclearAntibodies	Neg	0.03	#NULL!	#NULL!	#NULL!	#NULL!	#NULL!	#NULL!	#NULL!	#NULL!	#NULL!	#NULL!	#NULL!	#NULL!	#NULL!	#NULL!	#NULL!	0
504								504	NoLyme	AntinuclearAntibodies	4.51133	Neg	4.1949	Neg	-5.2871	Neg	4.15082	Neg	0.574942	Neg	Neg	504	CDC	NoLyme	AntiNuclearAntibodies	Neg	0.17	#NULL!	#NULL!	#NULL!	#NULL!	#NULL!	#NULL!	#NULL!	#NULL!	#NULL!	#NULL!	#NULL!	#NULL!	#NULL!	#NULL!	#NULL!	0
505								505	NoLyme	AntinuclearAntibodies	1.98277	Neg	1.64716	Neg	-4.69204	Neg	4.65603	Neg	2.92168	Neg	Neg	505	CDC	NoLyme	AntiNuclearAntibodies	Neg	0.1	#NULL!	#NULL!	#NULL!	#NULL!	#NULL!	#NULL!	#NULL!	#NULL!	#NULL!	#NULL!	#NULL!	#NULL!	#NULL!	#NULL!	#NULL!	0
506								506	NoLyme	AntinuclearAntibodies	1.76687	Neg	1.52068	Neg	-4.73964	Neg	8.7416	Neg	5.0214	Neg	1	506	CDC	NoLyme	AntiNuclearAntibodies	Pos	1.87	0	0	0	0	1	0	0	0	0	0	0	1	1	1	0	1
507								507	NoLyme	AntinuclearAntibodies	1.94116	Neg	1.70137	Neg	-4.95387	Neg	1.44907	Neg	-0.854277	Neg	Neg	507	CDC	NoLyme	AntiNuclearAntibodies	Neg	0.05	#NULL!	#NULL!	#NULL!	#NULL!	#NULL!	#NULL!	#NULL!	#NULL!	#NULL!	#NULL!	#NULL!	#NULL!	#NULL!	#NULL!	#NULL!	0
508								508	NoLyme	AntinuclearAntibodies	2.31402	Neg	2.11696	Neg	-4.40641	Neg	12.4757	Neg	9.13261	Neg	Neg	508	CDC	NoLyme	AntiNuclearAntibodies	Neg	0.3	#NULL!	#NULL!	#NULL!	#NULL!	#NULL!	#NULL!	#NULL!	#NULL!	#NULL!	#NULL!	#NULL!	#NULL!	#NULL!	#NULL!	#NULL!	0
509								509	NoLyme	AntinuclearAntibodies	3.57264	Neg	3.41793	Neg	-5.07288	Neg	4.63406	Neg	3.43338	Neg	Neg	509	CDC	NoLyme	AntiNuclearAntibodies	Neg	0.06	#NULL!	#NULL!	#NULL!	#NULL!	#NULL!	#NULL!	#NULL!	#NULL!	#NULL!	#NULL!	#NULL!	#NULL!	#NULL!	#NULL!	#NULL!	0
510								510	NoLyme	AntinuclearAntibodies	0.415955	Neg	0.732075	Neg	0.818944	Neg	4.82273	Neg	-0.64254	Neg	Neg	510	CDC	NoLyme	AntiNuclearAntibodies	Neg	0.01	#NULL!	#NULL!	#NULL!	#NULL!	#NULL!	#NULL!	#NULL!	#NULL!	#NULL!	#NULL!	#NULL!	#NULL!	#NULL!	#NULL!	#NULL!	0
511								511	NoLyme	AntinuclearAntibodies	1.18609	Neg	1.64533	Neg	1.0339	Neg	13.9754	Neg	4.7038	Neg	Neg	511	CDC	NoLyme	AntiNuclearAntibodies	Neg	0.21	#NULL!	#NULL!	#NULL!	#NULL!	#NULL!	#NULL!	#NULL!	#NULL!	#NULL!	#NULL!	#NULL!	#NULL!	#NULL!	#NULL!	#NULL!	0
512								512	NoLyme	AntinuclearAntibodies	1.36433	Neg	1.71937	Neg	1.09252	Neg	9.87553	Neg	2.99226	Neg	Neg	512	CDC	NoLyme	AntiNuclearAntibodies	Neg	0.24	#NULL!	#NULL!	#NULL!	#NULL!	#NULL!	#NULL!	#NULL!	#NULL!	#NULL!	#NULL!	#NULL!	#NULL!	#NULL!	#NULL!	#NULL!	0
513								513	NoLyme	AntinuclearAntibodies	0.917055	Neg	1.29977	Neg	1.09252	Neg	8.10262	Neg	0.804323	Neg	Neg	513	CDC	NoLyme	AntiNuclearAntibodies	Neg	0.11	#NULL!	#NULL!	#NULL!	#NULL!	#NULL!	#NULL!	#NULL!	#NULL!	#NULL!	#NULL!	#NULL!	#NULL!	#NULL!	#NULL!	#NULL!	0
514								514	NoLyme	AntinuclearAntibodies	0.931603	Neg	1.38616	Neg	1.34656	Neg	6.06377	Neg	-0.219068	Neg	Neg	514	CDC	NoLyme	AntiNuclearAntibodies	Neg	0.52	#NULL!	#NULL!	#NULL!	#NULL!	#NULL!	#NULL!	#NULL!	#NULL!	#NULL!	#NULL!	#NULL!	#NULL!	#NULL!	#NULL!	#NULL!	0
515								515	NoLyme	AntinuclearAntibodies	1.89253	Neg	2.3858	Neg	1.9328	Neg	6.77293	Neg	0.751389	Neg	Neg	515	CDC	NoLyme	AntiNuclearAntibodies	Neg	0.12	#NULL!	#NULL!	#NULL!	#NULL!	#NULL!	#NULL!	#NULL!	#NULL!	#NULL!	#NULL!	#NULL!	#NULL!	#NULL!	#NULL!	#NULL!	0
516								516	NoLyme	AntinuclearAntibodies	1.18844	Neg	1.7564	Neg	1.13161	Neg	8.52369	Neg	0.292628	Neg	Neg	516	CDC	NoLyme	AntiNuclearAntibodies	Neg	0.06	#NULL!	#NULL!	#NULL!	#NULL!	#NULL!	#NULL!	#NULL!	#NULL!	#NULL!	#NULL!	#NULL!	#NULL!	#NULL!	#NULL!	#NULL!	0
517								517	NoLyme	AntinuclearAntibodies	1.23779	Neg	1.67001	Neg	1.32702	Neg	7.59291	Neg	0.786679	Neg	Neg	517	CDC	NoLyme	AntiNuclearAntibodies	Neg	0.04	#NULL!	#NULL!	#NULL!	#NULL!	#NULL!	#NULL!	#NULL!	#NULL!	#NULL!	#NULL!	#NULL!	#NULL!	#NULL!	#NULL!	#NULL!	0
518								518	NoLyme	AntinuclearAntibodies	1.1251	Neg	1.5466	Neg	2.8317	Neg	12.3576	Neg	1.49247	Neg	Neg	518	CDC	NoLyme	AntiNuclearAntibodies	Neg	0.08	#NULL!	#NULL!	#NULL!	#NULL!	#NULL!	#NULL!	#NULL!	#NULL!	#NULL!	#NULL!	#NULL!	#NULL!	#NULL!	#NULL!	#NULL!	0
519								519	NoLyme	AntinuclearAntibodies	1.55978	Neg	1.9662	Neg	1.65922	Neg	9.56527	Neg	1.68656	Neg	Neg	519	CDC	NoLyme	AntiNuclearAntibodies	Neg	0.13	#NULL!	#NULL!	#NULL!	#NULL!	#NULL!	#NULL!	#NULL!	#NULL!	#NULL!	#NULL!	#NULL!	#NULL!	#NULL!	#NULL!	#NULL!	0
520								520	NoLyme	AntinuclearAntibodies	1.65615	Neg	2.07727	Neg	1.46381	Neg	8.63449	Neg	1.66891	Neg	Neg	520	CDC	NoLyme	AntiNuclearAntibodies	Neg	0.28	#NULL!	#NULL!	#NULL!	#NULL!	#NULL!	#NULL!	#NULL!	#NULL!	#NULL!	#NULL!	#NULL!	#NULL!	#NULL!	#NULL!	#NULL!	0
521								521	NoLyme	AntinuclearAntibodies	0.808482	Neg	1.11465	Neg	0.936192	Neg	9.05556	Neg	1.58069	Neg	Neg	521	CDC	NoLyme	AntiNuclearAntibodies	Neg	0.07	#NULL!	#NULL!	#NULL!	#NULL!	#NULL!	#NULL!	#NULL!	#NULL!	#NULL!	#NULL!	#NULL!	#NULL!	#NULL!	#NULL!	#NULL!	0
522								522	NoLyme	AntinuclearAntibodies	1.48152	Neg	1.68235	Neg	0.936192	Neg	16.4796	Neg	3.80392	Neg	Neg	522	CDC	NoLyme	AntiNuclearAntibodies	Neg	0.07	#NULL!	#NULL!	#NULL!	#NULL!	#NULL!	#NULL!	#NULL!	#NULL!	#NULL!	#NULL!	#NULL!	#NULL!	#NULL!	#NULL!	#NULL!	0
523								523	NoLyme	AntinuclearAntibodies	8.74015	Neg	9.12411	Neg	1.40518	Neg	21.9757	Neg	9.85604	Neg	Neg	523	CDC	NoLyme	AntiNuclearAntibodies	Neg	0.45	#NULL!	#NULL!	#NULL!	#NULL!	#NULL!	#NULL!	#NULL!	#NULL!	#NULL!	#NULL!	#NULL!	#NULL!	#NULL!	#NULL!	#NULL!	0
524								524	NoLyme	AntinuclearAntibodies	2.62053	Neg	2.9535	Neg	1.19023	Neg	17.7207	Neg	0.733744	Neg	Neg	524	CDC	NoLyme	AntiNuclearAntibodies	Neg	0.04	#NULL!	#NULL!	#NULL!	#NULL!	#NULL!	#NULL!	#NULL!	#NULL!	#NULL!	#NULL!	#NULL!	#NULL!	#NULL!	#NULL!	#NULL!	0
525								525	NoLyme	AntinuclearAntibodies	1.74126	Neg	2.08961	Neg	1.48335	Neg	11.449	Neg	0.521228	Neg	Neg	525	CDC	NoLyme	AntiNuclearAntibodies	Neg	0.37	#NULL!	#NULL!	#NULL!	#NULL!	#NULL!	#NULL!	#NULL!	#NULL!	#NULL!	#NULL!	#NULL!	#NULL!	#NULL!	#NULL!	#NULL!	0
526								526	NoLyme	AntinuclearAntibodies	2.46221	Neg	2.76838	Neg	1.75693	Neg	55.7276	1	7.60591	Neg	Neg	526	CDC	NoLyme	AntiNuclearAntibodies	Neg	0.08	#NULL!	#NULL!	#NULL!	#NULL!	#NULL!	#NULL!	#NULL!	#NULL!	#NULL!	#NULL!	#NULL!	#NULL!	#NULL!	#NULL!	#NULL!	0
527								527	NoLyme	AntinuclearAntibodies	2.36763	Neg	2.76838	Neg	1.77647	Neg	10.9614	Neg	2.66631	Neg	Neg	527	CDC	NoLyme	AntiNuclearAntibodies	Neg	0.31	#NULL!	#NULL!	#NULL!	#NULL!	#NULL!	#NULL!	#NULL!	#NULL!	#NULL!	#NULL!	#NULL!	#NULL!	#NULL!	#NULL!	#NULL!	0
528								528	NoLyme	AntinuclearAntibodies	2.27194	Neg	2.34878	Neg	1.87418	Neg	9.01124	Neg	1.11162	Neg	Neg	528	CDC	NoLyme	AntiNuclearAntibodies	Neg	0.49	#NULL!	#NULL!	#NULL!	#NULL!	#NULL!	#NULL!	#NULL!	#NULL!	#NULL!	#NULL!	#NULL!	#NULL!	#NULL!	#NULL!	#NULL!	0
529								529	NoLyme	AntinuclearAntibodies	1.64702	Neg	2.0279	Neg	1.73739	Neg	5.9308	Neg	0.00955654	Neg	Neg	529	CDC	NoLyme	AntiNuclearAntibodies	Neg	0.08	#NULL!	#NULL!	#NULL!	#NULL!	#NULL!	#NULL!	#NULL!	#NULL!	#NULL!	#NULL!	#NULL!	#NULL!	#NULL!	#NULL!	#NULL!	0
530								530	NoLyme	AntinuclearAntibodies	2.50476	Neg	2.92881	Neg	2.05005	Neg	10.1193	Neg	1.2297	Neg	Neg	530	CDC	NoLyme	AntiNuclearAntibodies	Neg	0.07	#NULL!	#NULL!	#NULL!	#NULL!	#NULL!	#NULL!	#NULL!	#NULL!	#NULL!	#NULL!	#NULL!	#NULL!	#NULL!	#NULL!	#NULL!	0
531								531	NoLyme	AntinuclearAntibodies	1.60987	Neg	2.10195	Neg	1.71785	Neg	15.9034	Neg	6.70065	Neg	Neg	531	CDC	NoLyme	AntiNuclearAntibodies	Neg	0.26	#NULL!	#NULL!	#NULL!	#NULL!	#NULL!	#NULL!	#NULL!	#NULL!	#NULL!	#NULL!	#NULL!	#NULL!	#NULL!	#NULL!	#NULL!	0
532								532	NoLyme	AntinuclearAntibodies	1.58707	Neg	2.08961	Neg	2.90987	Neg	13.1333	Neg	0.777064	Neg	Neg	532	CDC	NoLyme	AntiNuclearAntibodies	Neg	0.18	#NULL!	#NULL!	#NULL!	#NULL!	#NULL!	#NULL!	#NULL!	#NULL!	#NULL!	#NULL!	#NULL!	#NULL!	#NULL!	#NULL!	#NULL!	0
533								533	NoLyme	AntinuclearAntibodies	1.47059	Neg	1.67001	Neg	1.32702	Neg	8.4572	Neg	2.62695	Neg	Neg	533	CDC	NoLyme	AntiNuclearAntibodies	Neg	0.31	#NULL!	#NULL!	#NULL!	#NULL!	#NULL!	#NULL!	#NULL!	#NULL!	#NULL!	#NULL!	#NULL!	#NULL!	#NULL!	#NULL!	#NULL!	0
534								534	NoLyme	AntinuclearAntibodies	0.692708	Neg	1.07763	Neg	1.34656	Neg	12.2911	Neg	0.757384	Neg	Neg	534	CDC	NoLyme	AntiNuclearAntibodies	Neg	0.12	#NULL!	#NULL!	#NULL!	#NULL!	#NULL!	#NULL!	#NULL!	#NULL!	#NULL!	#NULL!	#NULL!	#NULL!	#NULL!	#NULL!	#NULL!	0
535								535	NoLyme	AntinuclearAntibodies	1.37331	Neg	1.74406	Neg	1.40518	Neg	12.0695	Neg	6.20866	Neg	Neg	535	CDC	NoLyme	AntiNuclearAntibodies	Neg	0.43	#NULL!	#NULL!	#NULL!	#NULL!	#NULL!	#NULL!	#NULL!	#NULL!	#NULL!	#NULL!	#NULL!	#NULL!	#NULL!	#NULL!	#NULL!	0
536								536	NoLyme	AntinuclearAntibodies	1.79867	Neg	2.176	Neg	1.13161	Neg	8.21343	Neg	2.35144	Neg	Neg	536	CDC	NoLyme	AntiNuclearAntibodies	Neg	0.12	#NULL!	#NULL!	#NULL!	#NULL!	#NULL!	#NULL!	#NULL!	#NULL!	#NULL!	#NULL!	#NULL!	#NULL!	#NULL!	#NULL!	#NULL!	0
537								537	NoLyme	AntinuclearAntibodies	1.71897	Neg	2.11429	Neg	1.28794	Neg	12.0252	Neg	2.17432	Neg	Neg	537	CDC	NoLyme	AntiNuclearAntibodies	Neg	0.34	#NULL!	#NULL!	#NULL!	#NULL!	#NULL!	#NULL!	#NULL!	#NULL!	#NULL!	#NULL!	#NULL!	#NULL!	#NULL!	#NULL!	#NULL!	0
538								538	NoLyme	AntinuclearAntibodies	1.25486	Neg	1.59596	Neg	1.38564	Neg	10.762	Neg	-0.443076	Neg	Neg	538	CDC	NoLyme	AntiNuclearAntibodies	Neg	0.33	#NULL!	#NULL!	#NULL!	#NULL!	#NULL!	#NULL!	#NULL!	#NULL!	#NULL!	#NULL!	#NULL!	#NULL!	#NULL!	#NULL!	#NULL!	0
539								539	NoLyme	AntinuclearAntibodies	8.5461	Neg	9.01304	Neg	1.05344	Neg	13.3327	Neg	-0.403717	Neg	Neg	539	CDC	NoLyme	AntiNuclearAntibodies	Neg	0.06	#NULL!	#NULL!	#NULL!	#NULL!	#NULL!	#NULL!	#NULL!	#NULL!	#NULL!	#NULL!	#NULL!	#NULL!	#NULL!	#NULL!	#NULL!	0
540								540	NoLyme	AntinuclearAntibodies	2.67614	Neg	3.11393	Neg	2.63629	Neg	25.5215	Neg	3.23702	Neg	Neg	540	CDC	NoLyme	AntiNuclearAntibodies	Neg	0.32	#NULL!	#NULL!	#NULL!	#NULL!	#NULL!	#NULL!	#NULL!	#NULL!	#NULL!	#NULL!	#NULL!	#NULL!	#NULL!	#NULL!	#NULL!	0
541								541	NoLyme	AntinuclearAntibodies	2.49326	Neg	2.79306	Neg	3.12482	Neg	10.0085	Neg	1.17066	Neg	Neg	541	CDC	NoLyme	AntiNuclearAntibodies	Neg	0.33	#NULL!	#NULL!	#NULL!	#NULL!	#NULL!	#NULL!	#NULL!	#NULL!	#NULL!	#NULL!	#NULL!	#NULL!	#NULL!	#NULL!	#NULL!	0
542								542	NoLyme	AntinuclearAntibodies	4.04685	Neg	4.17528	Neg	3.65244	Neg	6.41835	Neg	2.70567	Neg	Neg	542	CDC	NoLyme	AntiNuclearAntibodies	Neg	0.05	#NULL!	#NULL!	#NULL!	#NULL!	#NULL!	#NULL!	#NULL!	#NULL!	#NULL!	#NULL!	#NULL!	#NULL!	#NULL!	#NULL!	#NULL!	0
543								543	NoLyme	AntinuclearAntibodies	2.12856	Neg	2.54624	Neg	1.67876	Neg	15.704	Neg	2.27272	Neg	Neg	543	CDC	NoLyme	AntiNuclearAntibodies	Neg	0.18	#NULL!	#NULL!	#NULL!	#NULL!	#NULL!	#NULL!	#NULL!	#NULL!	#NULL!	#NULL!	#NULL!	#NULL!	#NULL!	#NULL!	#NULL!	0
544								544	NoLyme	AntinuclearAntibodies	1.28983	Neg	1.74406	Neg	1.07298	Neg	16.2137	Neg	0.973861	Neg	Neg	544	CDC	NoLyme	AntiNuclearAntibodies	Neg	0.26	#NULL!	#NULL!	#NULL!	#NULL!	#NULL!	#NULL!	#NULL!	#NULL!	#NULL!	#NULL!	#NULL!	#NULL!	#NULL!	#NULL!	#NULL!	0
545								545	NoLyme	AntinuclearAntibodies	1.28681	Neg	1.70703	Neg	1.07298	Neg	5.9308	Neg	-0.443076	Neg	Neg	545	CDC	NoLyme	AntiNuclearAntibodies	Neg	0.19	#NULL!	#NULL!	#NULL!	#NULL!	#NULL!	#NULL!	#NULL!	#NULL!	#NULL!	#NULL!	#NULL!	#NULL!	#NULL!	#NULL!	#NULL!	0
546								546	NoLyme	AntinuclearAntibodies	0.839701	Neg	1.00358	Neg	0.799403	Neg	8.72314	Neg	1.48553	Neg	Neg	546	CDC	NoLyme	AntiNuclearAntibodies	Neg	0.14	#NULL!	#NULL!	#NULL!	#NULL!	#NULL!	#NULL!	#NULL!	#NULL!	#NULL!	#NULL!	#NULL!	#NULL!	#NULL!	#NULL!	#NULL!	0
547								547	NoLyme	AntinuclearAntibodies	1.64665	Neg	2.06493	Neg	1.15115	Neg	9.87553	Neg	2.4892	Neg	Neg	547	CDC	NoLyme	AntiNuclearAntibodies	Neg	0.09	#NULL!	#NULL!	#NULL!	#NULL!	#NULL!	#NULL!	#NULL!	#NULL!	#NULL!	#NULL!	#NULL!	#NULL!	#NULL!	#NULL!	#NULL!	0
548								548	NoLyme	AntinuclearAntibodies	1.30404	Neg	1.67001	Neg	1.54197	Neg	11.3825	Neg	4.43749	Neg	Neg	548	CDC	NoLyme	AntiNuclearAntibodies	Neg	0.35	#NULL!	#NULL!	#NULL!	#NULL!	#NULL!	#NULL!	#NULL!	#NULL!	#NULL!	#NULL!	#NULL!	#NULL!	#NULL!	#NULL!	#NULL!	0
549								549	NoLyme	AntinuclearAntibodies	1.01381	Neg	1.36148	Neg	2.47996	Neg	11.6263	Neg	0.0489159	Neg	Neg	549	CDC	NoLyme	AntiNuclearAntibodies	Neg	0.44	#NULL!	#NULL!	#NULL!	#NULL!	#NULL!	#NULL!	#NULL!	#NULL!	#NULL!	#NULL!	#NULL!	#NULL!	#NULL!	#NULL!	#NULL!	0
550								550	NoLyme	AntinuclearAntibodies	2.57641	Neg	2.59299	Neg	-2.03628	Neg	-1.8966	Neg	-1.09251	Neg	Neg	550	CDC	NoLyme	AntiNuclearAntibodies	Neg	0.02	#NULL!	#NULL!	#NULL!	#NULL!	#NULL!	#NULL!	#NULL!	#NULL!	#NULL!	#NULL!	#NULL!	#NULL!	#NULL!	#NULL!	#NULL!	0
551								551	NoLyme	AntinuclearAntibodies	3.06384	Neg	2.95616	Neg	-1.8452	Neg	62.0115	1	1.87913	Neg	Neg	551	CDC	NoLyme	AntiNuclearAntibodies	Neg	0.47	#NULL!	#NULL!	#NULL!	#NULL!	#NULL!	#NULL!	#NULL!	#NULL!	#NULL!	#NULL!	#NULL!	#NULL!	#NULL!	#NULL!	#NULL!	0
552								552	NoLyme	AntinuclearAntibodies	3.75627	Neg	3.66338	Neg	-1.79743	Neg	8.17823	Neg	4.28005	Neg	Neg	552	CDC	NoLyme	AntiNuclearAntibodies	Neg	0.19	#NULL!	#NULL!	#NULL!	#NULL!	#NULL!	#NULL!	#NULL!	#NULL!	#NULL!	#NULL!	#NULL!	#NULL!	#NULL!	#NULL!	#NULL!	0
553								553	NoLyme	AntinuclearAntibodies	3.06024	Neg	2.99439	Neg	-1.08088	Neg	2.27602	Neg	1.64297	Neg	Neg	553	CDC	NoLyme	AntiNuclearAntibodies	Neg	0.37	#NULL!	#NULL!	#NULL!	#NULL!	#NULL!	#NULL!	#NULL!	#NULL!	#NULL!	#NULL!	#NULL!	#NULL!	#NULL!	#NULL!	#NULL!	0
554								554	NoLyme	AntinuclearAntibodies	3.29464	Neg	3.20464	Neg	-1.31973	Neg	9.69161	Neg	0.38347	Neg	Neg	554	CDC	NoLyme	AntiNuclearAntibodies	Neg	0.14	#NULL!	#NULL!	#NULL!	#NULL!	#NULL!	#NULL!	#NULL!	#NULL!	#NULL!	#NULL!	#NULL!	#NULL!	#NULL!	#NULL!	#NULL!	0
555								555	NoLyme	AntinuclearAntibodies	3.07832	Neg	2.86059	Neg	-1.86909	Neg	14.9236	Neg	9.59356	Neg	Neg	555	CDC	NoLyme	AntiNuclearAntibodies	Neg	0.13	#NULL!	#NULL!	#NULL!	#NULL!	#NULL!	#NULL!	#NULL!	#NULL!	#NULL!	#NULL!	#NULL!	#NULL!	#NULL!	#NULL!	#NULL!	0
556								556	NoLyme	AntinuclearAntibodies	2.76549	Neg	2.72679	Neg	-1.77355	Neg	0.762633	Neg	1.24938	Neg	Neg	556	CDC	NoLyme	AntiNuclearAntibodies	Neg	0.16	#NULL!	#NULL!	#NULL!	#NULL!	#NULL!	#NULL!	#NULL!	#NULL!	#NULL!	#NULL!	#NULL!	#NULL!	#NULL!	#NULL!	#NULL!	0
557								557	NoLyme	AntinuclearAntibodies	3.7821	Neg	3.45313	Neg	-1.15253	Neg	118.137	1	0.678666	Neg	Neg	557	CDC	NoLyme	AntiNuclearAntibodies	Neg	0.5	#NULL!	#NULL!	#NULL!	#NULL!	#NULL!	#NULL!	#NULL!	#NULL!	#NULL!	#NULL!	#NULL!	#NULL!	#NULL!	#NULL!	#NULL!	0
558								558	NoLyme	AntinuclearAntibodies	7.6131	Neg	7.62002	Neg	-0.67483	Neg	8.74034	Neg	2.2924	Neg	Neg	558	CDC	NoLyme	AntiNuclearAntibodies	Neg	0.26	#NULL!	#NULL!	#NULL!	#NULL!	#NULL!	#NULL!	#NULL!	#NULL!	#NULL!	#NULL!	#NULL!	#NULL!	#NULL!	#NULL!	#NULL!	0
559								559	NoLyme	AntinuclearAntibodies	22.5105	Neg	22.8731	Neg	-1.98851	Neg	54.5743	Neg	4.96884	Neg	Neg	559	CDC	NoLyme	AntiNuclearAntibodies	Neg	0.38	#NULL!	#NULL!	#NULL!	#NULL!	#NULL!	#NULL!	#NULL!	#NULL!	#NULL!	#NULL!	#NULL!	#NULL!	#NULL!	#NULL!	#NULL!	0
560								560	NoLyme	AntinuclearAntibodies	3.55493	Neg	3.52958	Neg	-1.79743	Neg	1.69228	Neg	3.13863	Neg	Neg	560	CDC	NoLyme	AntiNuclearAntibodies	Neg	0.26	#NULL!	#NULL!	#NULL!	#NULL!	#NULL!	#NULL!	#NULL!	#NULL!	#NULL!	#NULL!	#NULL!	#NULL!	#NULL!	#NULL!	#NULL!	0
561								561	NoLyme	AntinuclearAntibodies	3.16345	Neg	2.84147	Neg	-2.08405	Neg	0.676154	Neg	-0.876029	Neg	Neg	561	CDC	NoLyme	AntiNuclearAntibodies	Neg	0.04	#NULL!	#NULL!	#NULL!	#NULL!	#NULL!	#NULL!	#NULL!	#NULL!	#NULL!	#NULL!	#NULL!	#NULL!	#NULL!	#NULL!	#NULL!	0
562								562	NoLyme	AntinuclearAntibodies	2.97073	Neg	2.91793	Neg	-1.86909	Neg	1.7139	Neg	0.00955654	Neg	Neg	562	CDC	NoLyme	AntiNuclearAntibodies	Neg	0.26	#NULL!	#NULL!	#NULL!	#NULL!	#NULL!	#NULL!	#NULL!	#NULL!	#NULL!	#NULL!	#NULL!	#NULL!	#NULL!	#NULL!	#NULL!	0
563								563	NoLyme	AntinuclearAntibodies	2.7577	Neg	2.72679	Neg	-2.15571	Neg	11.659	Neg	2.80407	Neg	Neg	563	CDC	NoLyme	AntiNuclearAntibodies	Neg	0.35	#NULL!	#NULL!	#NULL!	#NULL!	#NULL!	#NULL!	#NULL!	#NULL!	#NULL!	#NULL!	#NULL!	#NULL!	#NULL!	#NULL!	#NULL!	0
564								564	NoLyme	AntinuclearAntibodies	6.30922	Neg	6.12911	Neg	-2.0124	Neg	9.56189	Neg	3.4535	Neg	Neg	564	CDC	NoLyme	AntiNuclearAntibodies	Neg	0.18	#NULL!	#NULL!	#NULL!	#NULL!	#NULL!	#NULL!	#NULL!	#NULL!	#NULL!	#NULL!	#NULL!	#NULL!	#NULL!	#NULL!	#NULL!	0
565								565	NoLyme	AntinuclearAntibodies	7.41372	Neg	7.48622	Neg	9.66742	1	4.15694	Neg	0.127635	Neg	Neg	565	CDC	NoLyme	AntiNuclearAntibodies	Neg	0.13	#NULL!	#NULL!	#NULL!	#NULL!	#NULL!	#NULL!	#NULL!	#NULL!	#NULL!	#NULL!	#NULL!	#NULL!	#NULL!	#NULL!	#NULL!	0
566								566	NoLyme	AntinuclearAntibodies	4.06354	Neg	3.89275	Neg	-1.00922	Neg	23.5499	Neg	6.99584	Neg	Neg	566	CDC	NoLyme	AntiNuclearAntibodies	Neg	0.21	#NULL!	#NULL!	#NULL!	#NULL!	#NULL!	#NULL!	#NULL!	#NULL!	#NULL!	#NULL!	#NULL!	#NULL!	#NULL!	#NULL!	#NULL!	0
567								567	NoLyme	AntinuclearAntibodies	3.68366	Neg	3.43401	Neg	-2.06017	Neg	10.9888	Neg	2.84343	Neg	Neg	567	CDC	NoLyme	AntiNuclearAntibodies	Neg	0.67	#NULL!	#NULL!	#NULL!	#NULL!	#NULL!	#NULL!	#NULL!	#NULL!	#NULL!	#NULL!	#NULL!	#NULL!	#NULL!	#NULL!	#NULL!	0
568								568	NoLyme	AntinuclearAntibodies	4.54016	Neg	4.33238	Neg	-1.41527	Neg	6.75132	Neg	-3.25162	Neg	Neg	568	CDC	NoLyme	AntiNuclearAntibodies	Equiv	0.75	0	0	0	0	0	1	0	0	0	0	0	0	0	0	0	0
569								569	NoLyme	AntinuclearAntibodies	3.15312	Neg	3.10907	Neg	-2.13182	Neg	7.81069	Neg	-2.13651	Neg	Neg	569	CDC	NoLyme	AntiNuclearAntibodies	Neg	0.15	#NULL!	#NULL!	#NULL!	#NULL!	#NULL!	#NULL!	#NULL!	#NULL!	#NULL!	#NULL!	#NULL!	#NULL!	#NULL!	#NULL!	#NULL!	0
570								570	NoLyme	AntinuclearAntibodies	3.98091	Neg	3.89275	Neg	-1.94074	Neg	22.2095	Neg	3.49215	Neg	Neg	570	CDC	NoLyme	AntiNuclearAntibodies	Neg	0.4	#NULL!	#NULL!	#NULL!	#NULL!	#NULL!	#NULL!	#NULL!	#NULL!	#NULL!	#NULL!	#NULL!	#NULL!	#NULL!	#NULL!	#NULL!	0
571								571	NoLyme	AntinuclearAntibodies	5.45723	Neg	5.53657	Neg	-1.10476	Neg	3.65969	Neg	-2.90646	Neg	Neg	571	CDC	NoLyme	AntiNuclearAntibodies	Neg	0.06	#NULL!	#NULL!	#NULL!	#NULL!	#NULL!	#NULL!	#NULL!	#NULL!	#NULL!	#NULL!	#NULL!	#NULL!	#NULL!	#NULL!	#NULL!	0
572								572	NoLyme	AntinuclearAntibodies	3.7863	Neg	3.72073	Neg	-1.8452	Neg	7.46477	Neg	-2.34891	Neg	Neg	572	CDC	NoLyme	AntiNuclearAntibodies	Pos	1.2	0	0	0	0	0	1	0	0	0	0	0	0	0	0	1	0
573								573	NoLyme	AntinuclearAntibodies	11.9836	Neg	11.9972	Neg	-1.74966	Neg	67.1571	1	6.62508	Neg	Neg	573	CDC	NoLyme	AntiNuclearAntibodies	Neg	0.34	#NULL!	#NULL!	#NULL!	#NULL!	#NULL!	#NULL!	#NULL!	#NULL!	#NULL!	#NULL!	#NULL!	#NULL!	#NULL!	#NULL!	#NULL!	0
574								574	NoLyme	AntinuclearAntibodies	3.97898	Neg	3.77807	Neg	-1.39138	Neg	1.58419	Neg	-3.54367	Neg	Neg	574	CDC	NoLyme	AntiNuclearAntibodies	Neg	0.25	#NULL!	#NULL!	#NULL!	#NULL!	#NULL!	#NULL!	#NULL!	#NULL!	#NULL!	#NULL!	#NULL!	#NULL!	#NULL!	#NULL!	#NULL!	0
575								575	NoLyme	AntinuclearAntibodies	2.90285	Neg	2.7459	Neg	-1.55858	Neg	-2.39386	Neg	-6.14559	Neg	Neg	575	CDC	NoLyme	AntiNuclearAntibodies	Neg	0.3	#NULL!	#NULL!	#NULL!	#NULL!	#NULL!	#NULL!	#NULL!	#NULL!	#NULL!	#NULL!	#NULL!	#NULL!	#NULL!	#NULL!	#NULL!	0
576								576	NoLyme	AntinuclearAntibodies	4.56572	Neg	4.48529	Neg	-0.67483	Neg	2.75166	Neg	-2.90646	Neg	Neg	576	CDC	NoLyme	AntiNuclearAntibodies	Neg	0.22	#NULL!	#NULL!	#NULL!	#NULL!	#NULL!	#NULL!	#NULL!	#NULL!	#NULL!	#NULL!	#NULL!	#NULL!	#NULL!	#NULL!	#NULL!	0
577								577	NoLyme	AntinuclearAntibodies	4.77958	Neg	4.77201	Neg	0.0178382	Neg	9.97267	Neg	-3.22507	Neg	Neg	577	CDC	NoLyme	AntiNuclearAntibodies	Neg	0.09	#NULL!	#NULL!	#NULL!	#NULL!	#NULL!	#NULL!	#NULL!	#NULL!	#NULL!	#NULL!	#NULL!	#NULL!	#NULL!	#NULL!	#NULL!	0
578								578	NoLyme	AntinuclearAntibodies	5.01091	Neg	4.88669	Neg	-1.31973	Neg	7.48639	Neg	-1.4993	Neg	Neg	578	CDC	NoLyme	AntiNuclearAntibodies	Equiv	0.76	0	0	1	0	0	1	0	0	1	0	0	0	1	0	0	0
579								579	NoLyme	AntinuclearAntibodies	3.84386	Neg	3.49136	Neg	-1.94074	Neg	10.9023	Neg	-2.69406	Neg	Neg	579	CDC	NoLyme	AntiNuclearAntibodies	Neg	0.37	#NULL!	#NULL!	#NULL!	#NULL!	#NULL!	#NULL!	#NULL!	#NULL!	#NULL!	#NULL!	#NULL!	#NULL!	#NULL!	#NULL!	#NULL!	0
580								580	NoLyme	AntinuclearAntibodies	4.48562	Neg	4.31327	Neg	-1.51081	Neg	4.39476	Neg	-3.06576	Neg	Neg	580	CDC	NoLyme	AntiNuclearAntibodies	Neg	0.09	#NULL!	#NULL!	#NULL!	#NULL!	#NULL!	#NULL!	#NULL!	#NULL!	#NULL!	#NULL!	#NULL!	#NULL!	#NULL!	#NULL!	#NULL!	0
581								581	NoLyme	AntinuclearAntibodies	3.4312	Neg	3.20464	Neg	-1.48692	Neg	3.37863	Neg	-5.11013	Neg	Neg	581	CDC	NoLyme	AntiNuclearAntibodies	Neg	0.07	#NULL!	#NULL!	#NULL!	#NULL!	#NULL!	#NULL!	#NULL!	#NULL!	#NULL!	#NULL!	#NULL!	#NULL!	#NULL!	#NULL!	#NULL!	0
582								582	NoLyme	AntinuclearAntibodies	4.58879	Neg	4.46618	Neg	-0.794256	Neg	2.21116	Neg	-4.15432	Neg	Neg	582	CDC	NoLyme	AntiNuclearAntibodies	Neg	0.1	#NULL!	#NULL!	#NULL!	#NULL!	#NULL!	#NULL!	#NULL!	#NULL!	#NULL!	#NULL!	#NULL!	#NULL!	#NULL!	#NULL!	#NULL!	0
583								583	NoLyme	AntinuclearAntibodies	4.43306	Neg	4.46618	Neg	-0.221013	Neg	6.9459	Neg	-2.37546	Neg	Neg	583	CDC	NoLyme	AntiNuclearAntibodies	Neg	0.51	#NULL!	#NULL!	#NULL!	#NULL!	#NULL!	#NULL!	#NULL!	#NULL!	#NULL!	#NULL!	#NULL!	#NULL!	#NULL!	#NULL!	#NULL!	0
584								584	NoLyme	AntinuclearAntibodies	2.9643	Neg	2.97527	Neg	-1.2003	Neg	11.7671	Neg	-3.62332	Neg	Neg	584	CDC	NoLyme	AntiNuclearAntibodies	Neg	0.11	#NULL!	#NULL!	#NULL!	#NULL!	#NULL!	#NULL!	#NULL!	#NULL!	#NULL!	#NULL!	#NULL!	#NULL!	#NULL!	#NULL!	#NULL!	0
585								585	NoLyme	AntinuclearAntibodies	3.14367	Neg	3.07084	Neg	-1.94074	Neg	4.13532	Neg	-2.26926	Neg	Neg	585	CDC	NoLyme	AntiNuclearAntibodies	Neg	0.23	#NULL!	#NULL!	#NULL!	#NULL!	#NULL!	#NULL!	#NULL!	#NULL!	#NULL!	#NULL!	#NULL!	#NULL!	#NULL!	#NULL!	#NULL!	0
586								586	NoLyme	AntinuclearAntibodies	4.64862	Neg	4.50441	Neg	-2.08405	Neg	3.8975	Neg	-0.915194	Neg	Neg	586	CDC	NoLyme	AntiNuclearAntibodies	Neg	0.08	#NULL!	#NULL!	#NULL!	#NULL!	#NULL!	#NULL!	#NULL!	#NULL!	#NULL!	#NULL!	#NULL!	#NULL!	#NULL!	#NULL!	#NULL!	0
587								587	NoLyme	AntinuclearAntibodies	3.66449	Neg	3.5487	Neg	-1.46304	Neg	-0.685894	Neg	-3.70297	Neg	Neg	587	CDC	NoLyme	AntiNuclearAntibodies	Neg	0.22	#NULL!	#NULL!	#NULL!	#NULL!	#NULL!	#NULL!	#NULL!	#NULL!	#NULL!	#NULL!	#NULL!	#NULL!	#NULL!	#NULL!	#NULL!	0
588								588	NoLyme	AntinuclearAntibodies	4.60384	Neg	4.54264	Neg	-1.46304	Neg	5.15145	Neg	0.837123	Neg	Neg	588	CDC	NoLyme	AntiNuclearAntibodies	Neg	0.09	#NULL!	#NULL!	#NULL!	#NULL!	#NULL!	#NULL!	#NULL!	#NULL!	#NULL!	#NULL!	#NULL!	#NULL!	#NULL!	#NULL!	#NULL!	0
589								589	NoLyme	AntinuclearAntibodies	6.2286	Neg	6.20557	Neg	5.43976	Neg	4.89202	Neg	2.66909	Neg	Neg	589	CDC	NoLyme	AntiNuclearAntibodies	Neg	0.52	#NULL!	#NULL!	#NULL!	#NULL!	#NULL!	#NULL!	#NULL!	#NULL!	#NULL!	#NULL!	#NULL!	#NULL!	#NULL!	#NULL!	#NULL!	0
590								590	NoLyme	AntinuclearAntibodies	-1.37363	Neg	-2.03922	Neg	-0.13837	Neg	8.43687	Neg	0.996425	Neg	Neg	590	CDC	NoLyme	AntiNuclearAntibodies	Neg	0.2	#NULL!	#NULL!	#NULL!	#NULL!	#NULL!	#NULL!	#NULL!	#NULL!	#NULL!	#NULL!	#NULL!	#NULL!	#NULL!	#NULL!	#NULL!	0
591								591	NoLyme	AntinuclearAntibodies	-0.436043	Neg	-0.415188	Neg	0.413098	Neg	17.0378	Neg	-2.56131	Neg	Neg	591	CDC	NoLyme	AntiNuclearAntibodies	Neg	0.08	#NULL!	#NULL!	#NULL!	#NULL!	#NULL!	#NULL!	#NULL!	#NULL!	#NULL!	#NULL!	#NULL!	#NULL!	#NULL!	#NULL!	#NULL!	0
592								592	NoLyme	AntinuclearAntibodies	-0.141003	Neg	0.0277299	Neg	-0.639704	Neg	3.14401	Neg	-1.7648	Neg	Neg	592	CDC	NoLyme	AntiNuclearAntibodies	Neg	0.12	#NULL!	#NULL!	#NULL!	#NULL!	#NULL!	#NULL!	#NULL!	#NULL!	#NULL!	#NULL!	#NULL!	#NULL!	#NULL!	#NULL!	#NULL!	0
593								593	NoLyme	AntinuclearAntibodies	0.87789	Neg	0.729016	Neg	-0.313837	Neg	44.6749	Neg	5.37722	Neg	Neg	593	CDC	NoLyme	AntiNuclearAntibodies	Neg	0.48	#NULL!	#NULL!	#NULL!	#NULL!	#NULL!	#NULL!	#NULL!	#NULL!	#NULL!	#NULL!	#NULL!	#NULL!	#NULL!	#NULL!	#NULL!	0
594								594	NoLyme	AntinuclearAntibodies	1.80687	Neg	1.31957	Neg	3.32084	Neg	25.3079	Neg	-0.171786	Neg	Neg	594	CDC	NoLyme	AntiNuclearAntibodies	Neg	0.2	#NULL!	#NULL!	#NULL!	#NULL!	#NULL!	#NULL!	#NULL!	#NULL!	#NULL!	#NULL!	#NULL!	#NULL!	#NULL!	#NULL!	#NULL!	0
595								595	NoLyme	AntinuclearAntibodies	-0.422314	Neg	-0.968835	Neg	-0.313837	Neg	1.67043	Neg	-2.21616	Neg	Neg	595	CDC	NoLyme	AntiNuclearAntibodies	Neg	0.43	#NULL!	#NULL!	#NULL!	#NULL!	#NULL!	#NULL!	#NULL!	#NULL!	#NULL!	#NULL!	#NULL!	#NULL!	#NULL!	#NULL!	#NULL!	0
596								596	NoLyme	AntinuclearAntibodies	-0.507616	Neg	-0.895015	Neg	-0.464237	Neg	2.09146	Neg	-5.13668	Neg	Neg	596	CDC	NoLyme	AntiNuclearAntibodies	Neg	0.34	#NULL!	#NULL!	#NULL!	#NULL!	#NULL!	#NULL!	#NULL!	#NULL!	#NULL!	#NULL!	#NULL!	#NULL!	#NULL!	#NULL!	#NULL!	0
597								597	NoLyme	AntinuclearAntibodies	0.168864	Neg	-0.267549	Neg	-0.13837	Neg	2.1516	Neg	-1.89755	Neg	Neg	597	CDC	NoLyme	AntiNuclearAntibodies	Neg	0.07	#NULL!	#NULL!	#NULL!	#NULL!	#NULL!	#NULL!	#NULL!	#NULL!	#NULL!	#NULL!	#NULL!	#NULL!	#NULL!	#NULL!	#NULL!	0
598								598	NoLyme	AntinuclearAntibodies	0.157808	Neg	0.0461848	Neg	2.4435	Neg	16.737	Neg	-1.0745	Neg	Neg	598	CDC	NoLyme	AntiNuclearAntibodies	Neg	0.13	#NULL!	#NULL!	#NULL!	#NULL!	#NULL!	#NULL!	#NULL!	#NULL!	#NULL!	#NULL!	#NULL!	#NULL!	#NULL!	#NULL!	#NULL!	0
599								599	NoLyme	AntinuclearAntibodies	-1.28232	Neg	-0.98729	Neg	0.713899	Neg	5.57993	Neg	-0.994844	Neg	Neg	599	CDC	NoLyme	AntiNuclearAntibodies	Neg	0.11	#NULL!	#NULL!	#NULL!	#NULL!	#NULL!	#NULL!	#NULL!	#NULL!	#NULL!	#NULL!	#NULL!	#NULL!	#NULL!	#NULL!	#NULL!	0
NIH 1								NIH 1	NoLyme	AntinuclearAntibodies	8.66458	Neg	11.0834	Neg	-2.49661	Neg	8.79752	Neg	4.69306	Neg	Neg	NIH 1	NIH	NoLyme	AntinuclearAntibodies	Neg	0.09	#NULL!	#NULL!	#NULL!	#NULL!	#NULL!	#NULL!	#NULL!	#NULL!	#NULL!	#NULL!	#NULL!	#NULL!	#NULL!	#NULL!	#NULL!	0
NIH 12								NIH 12	NoLyme	AntinuclearAntibodies	9.03931	Neg	11.7077	Neg	1.59543	Neg	16.736	Neg	9.13806	Neg	1	NIH 12	NIH	NoLyme	AntinuclearAntibodies	Pos	1.19	0	0	0	0	0	0	0	0	0	0	0	1	1	1	0	1
NIH 14								NIH 14	NoLyme	AntinuclearAntibodies	10.4636	Neg	12.4197	Neg	2.29238	Neg	9.38465	Neg	8.01887	Neg	Neg	NIH 14	NIH	NoLyme	AntinuclearAntibodies	Neg	0.26	#NULL!	#NULL!	#NULL!	#NULL!	#NULL!	#NULL!	#NULL!	#NULL!	#NULL!	#NULL!	#NULL!	#NULL!	#NULL!	#NULL!	#NULL!	0
NIH 17								NIH 17	NoLyme	AntinuclearAntibodies	8.57893	Neg	10.8476	Neg	-2.79186	Neg	3.42903	Neg	2.09793	Neg	Neg	NIH 17	NIH	NoLyme	AntinuclearAntibodies	Neg	0.15	#NULL!	#NULL!	#NULL!	#NULL!	#NULL!	#NULL!	#NULL!	#NULL!	#NULL!	#NULL!	#NULL!	#NULL!	#NULL!	#NULL!	#NULL!	0
NIH 18								NIH 18	NoLyme	AntinuclearAntibodies	23.5489	1	25.3106	1	-0.593876	Neg	6.45353	Neg	5.67569	Neg	Neg	NIH 18	NIH	NoLyme	AntinuclearAntibodies	Neg	0.07	#NULL!	#NULL!	#NULL!	#NULL!	#NULL!	#NULL!	#NULL!	#NULL!	#NULL!	#NULL!	#NULL!	#NULL!	#NULL!	#NULL!	#NULL!	0
NIH 24								NIH 24	NoLyme	AntinuclearAntibodies	7.75732	Neg	10.1402	Neg	-3.25115	Neg	11.0155	Neg	4.4663	Neg	Neg	NIH 24	NIH	NoLyme	AntinuclearAntibodies	Neg	0.07	#NULL!	#NULL!	#NULL!	#NULL!	#NULL!	#NULL!	#NULL!	#NULL!	#NULL!	#NULL!	#NULL!	#NULL!	#NULL!	#NULL!	#NULL!	0
NIH 25								NIH 25	NoLyme	AntinuclearAntibodies	15.9313	Neg	17.373	Neg	-2.33258	Neg	10.4862	Neg	20.5709	1	Neg	NIH 25	NIH	NoLyme	AntinuclearAntibodies	Neg	0.36	#NULL!	#NULL!	#NULL!	#NULL!	#NULL!	#NULL!	#NULL!	#NULL!	#NULL!	#NULL!	#NULL!	#NULL!	#NULL!	#NULL!	#NULL!	0
NIH 26								NIH 26	NoLyme	AntinuclearAntibodies	18.7283	Neg	20.9228	Neg	-0.298624	Neg	18.5767	Neg	6.6106	Neg	Neg	NIH 26	NIH	NoLyme	AntinuclearAntibodies	Neg	0.28	#NULL!	#NULL!	#NULL!	#NULL!	#NULL!	#NULL!	#NULL!	#NULL!	#NULL!	#NULL!	#NULL!	#NULL!	#NULL!	#NULL!	#NULL!	0
NIH 28								NIH 28	NoLyme	AntinuclearAntibodies	8.44205	Neg	10.8476	Neg	1.04641	Neg	7.20966	Neg	5.97803	Neg	Neg	NIH 28	NIH	NoLyme	AntinuclearAntibodies	Neg	0.36	#NULL!	#NULL!	#NULL!	#NULL!	#NULL!	#NULL!	#NULL!	#NULL!	#NULL!	#NULL!	#NULL!	#NULL!	#NULL!	#NULL!	#NULL!	0
NIH 32								NIH 32	NoLyme	AntinuclearAntibodies	10.4073	Neg	12.3411	Neg	-2.23417	Neg	4.36159	Neg	2.87899	Neg	Neg	NIH 32	NIH	NoLyme	AntinuclearAntibodies	Neg	0.09	#NULL!	#NULL!	#NULL!	#NULL!	#NULL!	#NULL!	#NULL!	#NULL!	#NULL!	#NULL!	#NULL!	#NULL!	#NULL!	#NULL!	#NULL!	0
NIH 37								NIH 37	NoLyme	AntinuclearAntibodies	16.2215	Neg	18.1038	Neg	-0.856323	Neg	5.92424	Neg	13.6319	Neg	Neg	NIH 37	NIH	NoLyme	AntinuclearAntibodies	Neg	0.27	#NULL!	#NULL!	#NULL!	#NULL!	#NULL!	#NULL!	#NULL!	#NULL!	#NULL!	#NULL!	#NULL!	#NULL!	#NULL!	#NULL!	#NULL!	0
NIH 38								NIH 38	NoLyme	AntinuclearAntibodies	15.9857	Neg	17.634	Neg	-1.67647	Neg	5.92424	Neg	3.70334	Neg	Neg	NIH 38	NIH	NoLyme	AntinuclearAntibodies	Neg	0.13	#NULL!	#NULL!	#NULL!	#NULL!	#NULL!	#NULL!	#NULL!	#NULL!	#NULL!	#NULL!	#NULL!	#NULL!	#NULL!	#NULL!	#NULL!	0
NIH 5								NIH 5	NoLyme	AntinuclearAntibodies	8.60105	Neg	10.769	Neg	-2.52942	Neg	12.6033	Neg	4.54189	Neg	Neg	NIH 5	NIH	NoLyme	AntinuclearAntibodies	Neg	0.2	#NULL!	#NULL!	#NULL!	#NULL!	#NULL!	#NULL!	#NULL!	#NULL!	#NULL!	#NULL!	#NULL!	#NULL!	#NULL!	#NULL!	#NULL!	0
NIH 53								NIH 53	NoLyme	AntinuclearAntibodies	6.00673	Neg	8.77343	Neg	-1.20334	Neg	6.11088	Neg	6.19478	Neg	Neg	NIH 53	NIH	NoLyme	AntiNuclearAntibodies	Pos	1.02	0	0	0	0	0	0	0	0	0	0	0	0	0	0	0	0
NIH 58								NIH 58	NoLyme	AntinuclearAntibodies	5.67512	Neg	8.38995	Neg	9.59003	Neg	5.02426	Neg	4.24305	Neg	Neg	NIH 58	NIH	NoLyme	AntiNuclearAntibodies	Neg	0.19	#NULL!	#NULL!	#NULL!	#NULL!	#NULL!	#NULL!	#NULL!	#NULL!	#NULL!	#NULL!	#NULL!	#NULL!	#NULL!	#NULL!	#NULL!	0
NIH 59								NIH 59	NoLyme	AntinuclearAntibodies	9.06735	Neg	11.7135	Neg	10.9435	1	28.9298	Neg	8.36886	Neg	Neg	NIH 59	NIH	NoLyme	AntiNuclearAntibodies	Neg	0.4	#NULL!	#NULL!	#NULL!	#NULL!	#NULL!	#NULL!	#NULL!	#NULL!	#NULL!	#NULL!	#NULL!	#NULL!	#NULL!	#NULL!	#NULL!	0
108								108	Lyme	EarlyLymeAcute	8.70399	Neg	11.4312	Neg	5.63283	Neg	441.466	1	-0.989179	Neg	Neg	108	Tufts	Lyme	EarlyLymeAcute	Pos	1.66	0	0	0	0	0	1	1	0	0	0	1	0	0	0	1	0
10a								10a	Lyme	EarlyLymeAcute	16.8932	Neg	18.2952	Neg	3.51945	Neg	544.295	1	2.28327	Neg	Neg	10a	Tufts	Lyme	EarlyLymeAcute	Pos	1.77	0	0	0	0	0	0	0	0	0	0	0	0	0	0	1	0
11a								11a	Lyme	EarlyLymeAcute	16.672	Neg	18.2222	Neg	0.539772	Neg	18.7093	Neg	0.244796	Neg	Neg	11a	Tufts	Lyme	EarlyLymeAcute	Neg	0.01	#NULL!	#NULL!	#NULL!	#NULL!	#NULL!	#NULL!	#NULL!	#NULL!	#NULL!	#NULL!	#NULL!	#NULL!	#NULL!	#NULL!	#NULL!	0
12a								12a	Lyme	EarlyLymeAcute	68.4048	1	68.8266	1	25.3152	1	526.305	1	5.57114	Neg	1	12a	Tufts	Lyme	EarlyLymeAcute	Pos	1.95	0	0	0	0	0	0	0	0	0	0	0	1	1	0	1	1
13a								13a	Lyme	EarlyLymeAcute	22.2943	Neg	23.6258	Neg	2.22274	Neg	26.6147	Neg	0.672219	Neg	1	13a	Tufts	Lyme	EarlyLymeAcute	Pos	4.29	1	1	0	1	1	1	0	0	0	1	0	1	1	0	1	1
14a								14a	Lyme	EarlyLymeAcute	46.3957	1	47.7962	1	0.926026	Neg	539.48	1	20.6625	1	Neg	14a	Tufts	Lyme	EarlyLymeAcute	Pos	1.86	0	0	0	0	0	0	0	0	0	0	0	0	0	0	1	0
17a								17a	Lyme	EarlyLymeAcute	53.7349	1	54.6603	1	5.28518	Neg	214.141	1	8.5631	Neg	1	17a	Tufts	Lyme	EarlyLymeAcute	Pos	3.8	0	0	0	0	0	0	0	0	0	0	0	1	1	0	1	1
18a								18a	Lyme	EarlyLymeAcute	51.3512	1	51.8855	1	40.793	1	5.83757	Neg	19.3473	Neg	Neg	18a	Tufts	Lyme	EarlyLymeAcute	Pos	1.51	0	0	0	0	0	1	0	0	0	0	0	0	0	0	1	0
19a								19a	Lyme	EarlyLymeAcute	92.474	1	92.924	1	95.8894	1	16.9103	Neg	6.22872	Neg	Neg	19a	Tufts	Lyme	EarlyLymeAcute	Pos	2.71	0	0	0	0	1	1	1	0	0	0	0	0	0	0	0	0
1a								1a	Lyme	EarlyLymeAcute	21.0285	Neg	22.1289	Neg	-0.0396098	Neg	1.9862	Neg	2.51343	Neg	Neg	1a	Tufts	Lyme	EarlyLymeAcute	Neg	0.16	#NULL!	#NULL!	#NULL!	#NULL!	#NULL!	#NULL!	#NULL!	#NULL!	#NULL!	#NULL!	#NULL!	#NULL!	#NULL!	#NULL!	#NULL!	0
20a								20a	Lyme	EarlyLymeAcute	185.619	1	191.248	1	68.0515	1	547.335	1	56.7304	1	1	20a	Tufts	Lyme	EarlyLymeAcute	Pos	4.62	0	0	0	0	1	1	1	0	0	1	0	1	1	1	1	1
21a								21a	Lyme	EarlyLymeAcute	199.23	1	204.027	1	139.398	1	541.507	1	60.6429	1	1	21a	Tufts	Lyme	EarlyLymeAcute	Pos	4.38	1	0	1	1	1	1	1	0	0	1	1	1	1	1	1	1
22a								22a	Lyme	EarlyLymeAcute	16.7448	Neg	18.2587	Neg	2.22274	Neg	0.998016	Neg	1.03388	Neg	Neg	22a	Tufts	Lyme	EarlyLymeAcute	Neg	0.26	#NULL!	#NULL!	#NULL!	#NULL!	#NULL!	#NULL!	#NULL!	#NULL!	#NULL!	#NULL!	#NULL!	#NULL!	#NULL!	#NULL!	#NULL!	0
23a								23a	Lyme	EarlyLymeAcute	98.9685	1	100.117	1	30.2814	1	79.7991	1	25.7587	1	Neg	23a	Tufts	Lyme	EarlyLymeAcute	Pos	2.97	0	0	0	0	0	0	0	0	0	0	0	0	0	0	1	0
24a								24a	Lyme	EarlyLymeAcute	28.0098	1	29.139	1	4.29196	Neg	4.01323	Neg	5.86705	Neg	Neg	24a	Tufts	Lyme	EarlyLymeAcute	Neg	0.49	#NULL!	#NULL!	#NULL!	#NULL!	#NULL!	#NULL!	#NULL!	#NULL!	#NULL!	#NULL!	#NULL!	#NULL!	#NULL!	#NULL!	#NULL!	0
25a								25a	Lyme	EarlyLymeAcute	169.115	1	177.666	1	114.402	1	108.152	1	12.1798	Neg	1	25a	Tufts	Lyme	EarlyLymeAcute	Pos	5.19	1	1	1	1	1	1	1	1	1	1	1	1	0	1	1	1
26a								26a	Lyme	EarlyLymeAcute	158.932	1	168.1	1	82.5637	1	177.401	1	26.5149	1	1	26a	Tufts	Lyme	EarlyLymeAcute	Pos	4.55	0	0	0	0	0	1	0	0	0	0	0	1	1	1	1	1
27a								27a	Lyme	EarlyLymeAcute	119.991	1	124.616	1	113.381	1	576.22	1	10.7002	Neg	1	27a	Tufts	Lyme	EarlyLymeAcute	Pos	4.44	1	0	1	0	1	1	1	0	0	1	0	1	1	0	1	1
28a								28a	Lyme	EarlyLymeAcute	141.953	1	147.691	1	140.971	1	239.023	1	17.7691	Neg	1	28a	Tufts	Lyme	EarlyLymeAcute	Pos	4.03	0	0	0	0	0	1	0	0	0	0	0	1	1	1	1	1
29a								29a	Lyme	EarlyLymeAcute	59.9793	1	61.3783	1	40.6275	1	503.754	1	47.1627	1	1	29a	Tufts	Lyme	EarlyLymeAcute	Pos	3.42	1	0	0	1	1	1	1	1	0	1	1	1	1	1	1	1
2a								2a	Lyme	EarlyLymeAcute	17.2505	Neg	18.7699	Neg	-0.453454	Neg	73.5153	1	2.38191	Neg	Neg	2a	Tufts	Lyme	EarlyLymeAcute	Neg	0.32	#NULL!	#NULL!	#NULL!	#NULL!	#NULL!	#NULL!	#NULL!	#NULL!	#NULL!	#NULL!	#NULL!	#NULL!	#NULL!	#NULL!	#NULL!	0
30a								30a	Lyme	EarlyLymeAcute	16.3191	Neg	17.8571	Neg	0.208697	Neg	0.339229	Neg	0.0804029	Neg	Neg	30a	Tufts	Lyme	EarlyLymeAcute	Neg	0.03	#NULL!	#NULL!	#NULL!	#NULL!	#NULL!	#NULL!	#NULL!	#NULL!	#NULL!	#NULL!	#NULL!	#NULL!	#NULL!	#NULL!	#NULL!	0
31a								31a	Lyme	EarlyLymeAcute	17.1253	Neg	18.6968	Neg	5.69903	Neg	9.6636	Neg	7.54386	Neg	Neg	31a	Tufts	Lyme	EarlyLymeAcute	Pos	1.26	0	0	0	0	0	0	0	0	0	0	0	0	1	0	0	0
33a								33a	Lyme	EarlyLymeAcute	277.944	1	281.321	1	28.7915	1	185.433	1	73.0382	1	1	33a	Tufts	Lyme	EarlyLymeAcute	Pos	4.13	0	0	0	0	0	1	0	0	0	1	1	1	1	1	1	1
34a								34a	Lyme	EarlyLymeAcute	24.6351	1	25.926	1	5.72662	Neg	2.3916	Neg	11.7523	Neg	Neg	34a	Tufts	Lyme	EarlyLymeAcute	Pos	3.61	0	0	0	0	0	0	0	0	0	0	0	0	1	0	0	0
35a								35a	Lyme	EarlyLymeAcute	252.138	1	258.064	1	73.5419	1	28.211	Neg	48.1162	1	1	35a	Tufts	Lyme	EarlyLymeAcute	Pos	6.12	1	1	1	1	1	1	1	1	1	1	1	1	1	1	1	1
36a								36a	Lyme	EarlyLymeAcute	31.8326	1	32.8997	1	7.02333	Neg	73.0338	1	3.03948	Neg	1	36a	Tufts	Lyme	EarlyLymeAcute	Pos	4.75	0	0	0	1	0	1	0	0	0	0	0	1	1	0	1	1
37a								37a	Lyme	EarlyLymeAcute	43.6989	1	45.0579	1	19.7973	1	2.1889	Neg	3.6313	Neg	1	37a	Tufts	Lyme	EarlyLymeAcute	Pos	2.19	1	0	0	1	1	1	1	0	0	0	1	0	1	0	0	1
38a								38a	Lyme	EarlyLymeAcute	232.273	1	242.583	1	121.741	1	26.0573	Neg	50.056	1	1	38a	Tufts	Lyme	EarlyLymeAcute	Pos	6.11	1	1	1	1	1	1	1	0	1	1	1	1	1	0	1	1
39a								39a	Lyme	EarlyLymeAcute	211.154	1	219.837	1	102.235	1	571.406	1	10.3714	Neg	1	39a	Tufts	Lyme	EarlyLymeAcute	Pos	5.35	1	1	1	1	1	1	1	1	1	1	1	1	1	0	1	1
3a								3a	Lyme	EarlyLymeAcute	16.1829	Neg	17.638	Neg	2.0572	Neg	6.69906	Neg	0.90237	Neg	Neg	3a	Tufts	Lyme	EarlyLymeAcute	Neg	0.18	#NULL!	#NULL!	#NULL!	#NULL!	#NULL!	#NULL!	#NULL!	#NULL!	#NULL!	#NULL!	#NULL!	#NULL!	#NULL!	#NULL!	#NULL!	0
40a								40a	Lyme	EarlyLymeAcute	129.75	1	136.299	1	72.4107	1	29.7059	Neg	12.5743	Neg	1	40a	Tufts	Lyme	EarlyLymeAcute	Pos	3.82	1	1	0	1	1	1	1	0	0	0	1	1	1	0	1	1
4a								4a	Lyme	EarlyLymeAcute	26.441	1	27.7151	1	0.705309	Neg	115.475	1	12.8045	Neg	Neg	4a	Tufts	Lyme	EarlyLymeAcute	Pos	2.17	0	0	0	0	0	0	0	0	0	0	0	0	0	0	1	0
5a								5a	Lyme	EarlyLymeAcute	18.3378	Neg	20.0112	Neg	1.31228	Neg	5.05209	Neg	0.343432	Neg	Neg	5a	Tufts	Lyme	EarlyLymeAcute	Neg	0.03	#NULL!	#NULL!	#NULL!	#NULL!	#NULL!	#NULL!	#NULL!	#NULL!	#NULL!	#NULL!	#NULL!	#NULL!	#NULL!	#NULL!	#NULL!	0
6a								6a	Lyme	EarlyLymeAcute	169.46	1	172.336	1	6.63707	Neg	129.487	1	10.3714	Neg	1	6a	Tufts	Lyme	EarlyLymeAcute	Pos	2	1	1	0	1	1	1	0	0	0	1	1	1	0	1	1	1
7a								7a	Lyme	EarlyLymeAcute	17.5846	Neg	19.0985	Neg	5.61626	Neg	22.7887	Neg	4.7163	Neg	Neg	7a	Tufts	Lyme	EarlyLymeAcute	Neg	0.09	#NULL!	#NULL!	#NULL!	#NULL!	#NULL!	#NULL!	#NULL!	#NULL!	#NULL!	#NULL!	#NULL!	#NULL!	#NULL!	#NULL!	#NULL!	0
8a								8a	Lyme	EarlyLymeAcute	57.3927	1	57.8733	1	24.4875	1	11.2599	Neg	5.6369	Neg	Neg	8a	Tufts	Lyme	EarlyLymeAcute	Pos	2.57	0	0	0	0	0	1	0	0	0	0	0	0	1	0	0	0
94-0880								94-0880	Lyme	EarlyLymeAcute	107.83	1	114.277	1	70.3575	1	473.396	1	33.1466	1	1	94-0880	CDC	Lyme	EarlyLymeAcute	Pos	6.98	1	0	0	1	1	1	1	0	0	1	1	1	1	1	1	1
9a								9a	Lyme	EarlyLymeAcute	24.6302	1	25.926	1	7.76825	Neg	506.288	1	3.26963	Neg	1	9a	Tufts	Lyme	EarlyLymeAcute	Pos	4.95	0	0	0	0	0	1	0	0	0	1	0	1	1	0	1	1
C101	3.46	23.39.41	1.0	23.39.41.66	.00	1.0	1	C101	Lyme	EarlyLymeAcute	10.6925	Neg	8.61166	Neg	8.5319	Neg	603.667	1	10.5128	Neg	1		NYMC	Lyme	EarlyLymeAcute	Pos	3.46	0	0	1	0	0	1	1	0	0	1	0	1	1	1	1	1
C104	.13					.00	1	C104	Lyme	EarlyLymeAcute	3.9314	Neg	1.77792	Neg	6.57599	Neg	7.54384	Neg	1.20583	Neg	Neg		NYMC	Lyme	EarlyLymeAcute	Neg	0.13	#NULL!	#NULL!	#NULL!	#NULL!	#NULL!	#NULL!	#NULL!	#NULL!	#NULL!	#NULL!	#NULL!	#NULL!	#NULL!	#NULL!	#NULL!	0
C105	.21					.00	1	C105	Lyme	EarlyLymeAcute	6.39703	Neg	4.57044	Neg	9.05979	Neg	194.895	1	7.20423	Neg	Neg		NYMC	Lyme	EarlyLymeAcute	Neg	0.21	#NULL!	#NULL!	#NULL!	#NULL!	#NULL!	#NULL!	#NULL!	#NULL!	#NULL!	#NULL!	#NULL!	#NULL!	#NULL!	#NULL!	#NULL!	0
C107	.07					.00	1	C107	Lyme	EarlyLymeAcute	-4.27707	Neg	-6.71316	Neg	4.24785	Neg	13.0218	Neg	4.64886	Neg	Neg		NYMC	Lyme	EarlyLymeAcute	Neg	0.07	#NULL!	#NULL!	#NULL!	#NULL!	#NULL!	#NULL!	#NULL!	#NULL!	#NULL!	#NULL!	#NULL!	#NULL!	#NULL!	#NULL!	#NULL!	0
C108	.18					.00	1	C108	Lyme	EarlyLymeAcute	-2.78066	Neg	-5.28285	Neg	4.59978	Neg	33.4829	Neg	7.31182	Neg	Neg		NYMC	Lyme	EarlyLymeAcute	Neg	0.18	#NULL!	#NULL!	#NULL!	#NULL!	#NULL!	#NULL!	#NULL!	#NULL!	#NULL!	#NULL!	#NULL!	#NULL!	#NULL!	#NULL!	#NULL!	0
C109	1.31	23.41	1.0	41	.00	1.0	1	C109	Lyme	EarlyLymeAcute	4.68093	Neg	2.61795	Neg	5.51344	Neg	31.0816	Neg	11.8846	Neg	1		NYMC	Lyme	EarlyLymeAcute	Pos	1.31	0	0	0	0	0	1	0	0	0	0	0	1	1	0	1	1
C111	.63					.00	1	C111	Lyme	EarlyLymeAcute	5.70772	Neg	3.66231	Neg	6.84671	Neg	25.7537	Neg	2.55076	Neg	Neg		NYMC	Lyme	EarlyLymeAcute	Neg	0.63	#NULL!	#NULL!	#NULL!	#NULL!	#NULL!	#NULL!	#NULL!	#NULL!	#NULL!	#NULL!	#NULL!	#NULL!	#NULL!	#NULL!	#NULL!	0
C112	2.10	41	.00	41	.00	.00	1	C112	Lyme	EarlyLymeAcute	26.3283	1	25.6619	1	17.2624	1	15.8483	Neg	12.584	Neg	Neg		NYMC	Lyme	EarlyLymeAcute	Pos	2.1	0	0	0	0	0	1	0	0	0	0	0	0	1	0	0	0
C113	2.56		.00	18.28.30.39.41.45.58.60.66.93	1.0	1.0	1	C113	Lyme	EarlyLymeAcute	63.6777	1	69.2071	1	19.1033	1	20.0506	Neg	7.55391	Neg	1		NYMC	Lyme	EarlyLymeAcute	Pos	2.56	1	1	1	1	1	1	1	1	1	0	1	0	0	0	0	1
C114	.21					.00	1	C114	Lyme	EarlyLymeAcute	-0.978602	Neg	-3.35306	Neg	6.35942	Neg	92.1147	1	3.27703	Neg	Neg		NYMC	Lyme	EarlyLymeAcute	Neg	0.21	#NULL!	#NULL!	#NULL!	#NULL!	#NULL!	#NULL!	#NULL!	#NULL!	#NULL!	#NULL!	#NULL!	#NULL!	#NULL!	#NULL!	#NULL!	0
C115	.52					.00	1	C115	Lyme	EarlyLymeAcute	6.24201	Neg	4.04826	Neg	5.43899	Neg	13.7972	Neg	9.51751	Neg	Neg		NYMC	Lyme	EarlyLymeAcute	Neg	0.52	#NULL!	#NULL!	#NULL!	#NULL!	#NULL!	#NULL!	#NULL!	#NULL!	#NULL!	#NULL!	#NULL!	#NULL!	#NULL!	#NULL!	#NULL!	0
C117	1.52	23.41	1.0	23.41	.00	1.0	1	C117	Lyme	EarlyLymeAcute	17.5344	Neg	15.7859	Neg	12.5926	1	19.9756	Neg	2.22798	Neg	1		NYMC	Lyme	EarlyLymeAcute	Pos	1.52	0	0	0	0	0	1	0	0	0	1	0	1	1	0	1	1
C119	.18					.00	1	C119	Lyme	EarlyLymeAcute	9.05184	Neg	7.06782	Neg	5.98719	Neg	13.4971	Neg	7.87669	Neg	Neg		NYMC	Lyme	EarlyLymeAcute	Neg	0.18	#NULL!	#NULL!	#NULL!	#NULL!	#NULL!	#NULL!	#NULL!	#NULL!	#NULL!	#NULL!	#NULL!	#NULL!	#NULL!	#NULL!	#NULL!	0
C120	2.02	23	.00	23.39.41	.00	.00	1	C120	Lyme	EarlyLymeAcute	11.2052	Neg	9.29276	Neg	9.84486	1	120.655	1	22.3751	1	Neg		NYMC	Lyme	EarlyLymeAcute	Pos	2.02	0	0	0	0	0	1	1	0	0	1	0	0	0	0	1	0
C121	2.06	23.41	1.0	23.41.45	.00	1.0	1	C121	Lyme	EarlyLymeAcute	25.6682	1	25.4803	1	18.0069	1	63.9244	1	7.25803	Neg	1		NYMC	Lyme	EarlyLymeAcute	Pos	2.06	0	0	0	0	1	1	0	0	0	1	0	1	1	0	1	1
C123	.34					.00	1	C123	Lyme	EarlyLymeAcute	34.7745	1	35.7423	1	18.4806	1	61.8483	1	4.94474	Neg	Neg		NYMC	Lyme	EarlyLymeAcute	Neg	0.34	#NULL!	#NULL!	#NULL!	#NULL!	#NULL!	#NULL!	#NULL!	#NULL!	#NULL!	#NULL!	#NULL!	#NULL!	#NULL!	#NULL!	#NULL!	0
C124	1.02		.00	18.39.41.45.58	1.0	1.0	1	C124	Lyme	EarlyLymeAcute	42.3268	1	44.3469	1	25.8644	1	17.8994	Neg	10.3514	Neg	1		NYMC	Lyme	EarlyLymeAcute	Pos	1.02	1	0	0	1	1	1	1	0	0	0	1	0	0	0	0	1
C133	.17					.00	1	C133	Lyme	EarlyLymeAcute	-2.02273	Neg	-4.37471	Neg	5.44576	Neg	12.8717	Neg	7.12353	Neg	Neg		NYMC	Lyme	EarlyLymeAcute	Neg	0.17	#NULL!	#NULL!	#NULL!	#NULL!	#NULL!	#NULL!	#NULL!	#NULL!	#NULL!	#NULL!	#NULL!	#NULL!	#NULL!	#NULL!	#NULL!	0
C134	1.24		.00	41	.00	.00	1	C134	Lyme	EarlyLymeAcute	4.04689	Neg	1.95955	Neg	5.54051	Neg	23.8026	Neg	10.7549	Neg	Neg		NYMC	Lyme	EarlyLymeAcute	Pos	1.24	0	0	0	0	0	1	0	0	0	0	0	0	0	0	0	0
C136	.61					0	1	C136	Lyme	EarlyLymeAcute	10.0571	Neg	8.08948	Neg	6.96176	Neg	9.92012	Neg	1.28653	Neg	Neg		NYMC	Lyme	EarlyLymeAcute	Neg	0.61	#NULL!	#NULL!	#NULL!	#NULL!	#NULL!	#NULL!	#NULL!	#NULL!	#NULL!	#NULL!	#NULL!	#NULL!	#NULL!	#NULL!	#NULL!	0
C137	5.78		.00	18.28.30.39.41.45.58.60.66	1.0	1.0	1	C137	Lyme	EarlyLymeAcute	102.151	1	112.548	1	52.7056	1	11.6961	Neg	1.95899	Neg	Neg		NYMC	Lyme	EarlyLymeAcute	Pos	5.78	1	0	1	1	1	1	1	1	1	0	1	0	0	0	0	1
C138	1.84	23.41	1.0	23	.00	1.0	1	C138	Lyme	EarlyLymeAcute	13.0031	Neg	11.2453	Neg	8.68079	Neg	124.182	1	5.34822	Neg	1		NYMC	Lyme	EarlyLymeAcute	Pos	1.84	0	0	0	0	0	0	0	0	0	1	0	1	1	0	1	1
C139	4.90	23.39.41	1.0	18.23.39.41.45.58.60.66	1.0	1.0	1	C139	Lyme	EarlyLymeAcute	20.4543	Neg	19.4866	Neg	11.591	1	26.9293	Neg	35.7437	1	1		NYMC	Lyme	EarlyLymeAcute	Pos	4.9	1	0	1	1	1	1	1	0	0	1	1	1	1	1	1	1
C141	1.68		.00		.00	.00	1	C141	Lyme	EarlyLymeAcute	11.1292	Neg	9.22465	Neg	10.9006	1	38.5356	Neg	7.47322	Neg	Neg		NYMC	Lyme	EarlyLymeAcute	Pos	1.68	0	0	0	0	0	0	0	0	0	0	0	0	0	0	0	0
C142	3.97	23.41	1.0	23.41.58.66	.00	1.0	1	C142	Lyme	EarlyLymeAcute	218.063	1	217.937	1	89.3197	1	204.05	1	211.419	1	1		NYMC	Lyme	EarlyLymeAcute	Pos	3.97	0	0	1	1	0	1	0	0	0	1	0	1	1	0	1	1
C145	.22					.00	1	C145	Lyme	EarlyLymeAcute	-1.43555	Neg	-3.71631	Neg	3.76734	Neg	8.51937	Neg	2.52386	Neg	Neg		NYMC	Lyme	EarlyLymeAcute	Neg	0.22	#NULL!	#NULL!	#NULL!	#NULL!	#NULL!	#NULL!	#NULL!	#NULL!	#NULL!	#NULL!	#NULL!	#NULL!	#NULL!	#NULL!	#NULL!	0
C147	.57					.00	1	C147	Lyme	EarlyLymeAcute	5.70997	Neg	3.79853	Neg	10.8194	1	28.6303	Neg	6.82765	Neg	Neg		NYMC	Lyme	EarlyLymeAcute	Neg	0.57	#NULL!	#NULL!	#NULL!	#NULL!	#NULL!	#NULL!	#NULL!	#NULL!	#NULL!	#NULL!	#NULL!	#NULL!	#NULL!	#NULL!	#NULL!	0
C148	3.64	23.41	1.0	18.23.28.39.41.45.58.66	1.0	1.0	1	C148	Lyme	EarlyLymeAcute	280.434	1	280.962	1	56.0422	1	23.1023	Neg	22.0792	1	1		NYMC	Lyme	EarlyLymeAcute	Pos	3.64	1	0	1	1	1	1	1	0	1	1	1	1	1	0	1	1
C149	.21					.00	1	C149	Lyme	EarlyLymeAcute	-0.198515	Neg	-2.44492	Neg	12.3151	1	13.8973	Neg	3.8419	Neg	Neg		NYMC	Lyme	EarlyLymeAcute	Neg	0.21	#NULL!	#NULL!	#NULL!	#NULL!	#NULL!	#NULL!	#NULL!	#NULL!	#NULL!	#NULL!	#NULL!	#NULL!	#NULL!	#NULL!	#NULL!	0
C150	.68					.00	1	C150	Lyme	EarlyLymeAcute	1.93715	Neg	-0.0383543	Neg	4.85696	Neg	8.31926	Neg	1.98589	Neg	Neg		NYMC	Lyme	EarlyLymeAcute	Neg	0.68	#NULL!	#NULL!	#NULL!	#NULL!	#NULL!	#NULL!	#NULL!	#NULL!	#NULL!	#NULL!	#NULL!	#NULL!	#NULL!	#NULL!	#NULL!	0
C152	.39					.00	1	C152	Lyme	EarlyLymeAcute	2.03453	Neg	-0.0383543	Neg	8.7214	Neg	11.496	Neg	5.91309	Neg	Neg		NYMC	Lyme	EarlyLymeAcute	Neg	0.39	#NULL!	#NULL!	#NULL!	#NULL!	#NULL!	#NULL!	#NULL!	#NULL!	#NULL!	#NULL!	#NULL!	#NULL!	#NULL!	#NULL!	#NULL!	0
C153	1.85			41	.00	.00	1	C153	Lyme	EarlyLymeAcute	2.17396	Neg	-0.129168	Neg	5.39839	Neg	119.279	1	6.66626	Neg	Neg		NYMC	Lyme	EarlyLymeAcute	Pos	1.85	0	0	0	0	0	1	0	0	0	0	0	#NULL!	0	0	0	0
C86	.23					.00	1	C86	Lyme	EarlyLymeAcute	15.1326	Neg	13.4248	Neg	14.8734	1	36.4595	Neg	3.33082	Neg	Neg		NYMC	Lyme	EarlyLymeAcute	Neg	0.23	#NULL!	#NULL!	#NULL!	#NULL!	#NULL!	#NULL!	#NULL!	#NULL!	#NULL!	#NULL!	#NULL!	#NULL!	#NULL!	#NULL!	#NULL!	0
C87	.07					.00	1	C87	Lyme	EarlyLymeAcute	-3.11207	Neg	-5.6234	Neg	3.88916	Neg	17.024	Neg	1.7976	Neg	Neg		NYMC	Lyme	EarlyLymeAcute	Neg	0.07	#NULL!	#NULL!	#NULL!	#NULL!	#NULL!	#NULL!	#NULL!	#NULL!	#NULL!	#NULL!	#NULL!	#NULL!	#NULL!	#NULL!	#NULL!	0
C88	.15					.00	1	C88	Lyme	EarlyLymeAcute	22.1488	Neg	21.2575	Neg	4.85696	Neg	7.06858	Neg	2.25488	Neg	Neg		NYMC	Lyme	EarlyLymeAcute	Neg	0.15	#NULL!	#NULL!	#NULL!	#NULL!	#NULL!	#NULL!	#NULL!	#NULL!	#NULL!	#NULL!	#NULL!	#NULL!	#NULL!	#NULL!	#NULL!	0
C89	.10					.00	1	C89	Lyme	EarlyLymeAcute	0.308002	Neg	-1.94544	Neg	6.08871	Neg	11.596	Neg	7.20423	Neg	Neg		NYMC	Lyme	EarlyLymeAcute	Neg	0.1	#NULL!	#NULL!	#NULL!	#NULL!	#NULL!	#NULL!	#NULL!	#NULL!	#NULL!	#NULL!	#NULL!	#NULL!	#NULL!	#NULL!	#NULL!	0
C91	.23					.00	1	C91	Lyme	EarlyLymeAcute	0.490711	Neg	-1.80922	Neg	4.82989	Neg	9.72002	Neg	2.22798	Neg	Neg		NYMC	Lyme	EarlyLymeAcute	Neg	0.23	#NULL!	#NULL!	#NULL!	#NULL!	#NULL!	#NULL!	#NULL!	#NULL!	#NULL!	#NULL!	#NULL!	#NULL!	#NULL!	#NULL!	#NULL!	0
C92	.85	23	.00	39.41.66	.00	.00	1	C92	Lyme	EarlyLymeAcute	17.9339	Neg	16.24	Neg	23.6377	1	70.9282	1	57.2088	1	Neg		NYMC	Lyme	EarlyLymeAcute	Equiv	0.85	0	0	1	0	0	1	1	0	0	0	0	0	0	0	1	0
C93	.59					.00	1	C93	Lyme	EarlyLymeAcute	20.8327	Neg	19.5093	Neg	14.3929	1	87.0369	1	13.4447	Neg	Neg		NYMC	Lyme	EarlyLymeAcute	Neg	0.59	#NULL!	#NULL!	#NULL!	#NULL!	#NULL!	#NULL!	#NULL!	#NULL!	#NULL!	#NULL!	#NULL!	#NULL!	#NULL!	#NULL!	#NULL!	0
C94	.09					.00	1	C94	Lyme	EarlyLymeAcute	0.825753	Neg	-2.49033	Neg	3.84178	Neg	14.0474	Neg	4.05709	Neg	Neg		NYMC	Lyme	EarlyLymeAcute	Neg	0.09	#NULL!	#NULL!	#NULL!	#NULL!	#NULL!	#NULL!	#NULL!	#NULL!	#NULL!	#NULL!	#NULL!	#NULL!	#NULL!	#NULL!	#NULL!	0
C95	.20					.00	1	C95	Lyme	EarlyLymeAcute	10.0355	Neg	8.06677	Neg	9.01242	Neg	11.7961	Neg	6.28967	Neg	Neg		NYMC	Lyme	EarlyLymeAcute	Neg	0.2	#NULL!	#NULL!	#NULL!	#NULL!	#NULL!	#NULL!	#NULL!	#NULL!	#NULL!	#NULL!	#NULL!	#NULL!	#NULL!	#NULL!	#NULL!	0
10b								10b	Lyme	EarlyLymeConvalescent	11.3362	Neg	12.4595	Neg	23.8484	1	611.762	1	9.46016	Neg	1	10b	Tufts	Lyme	EarlyLymeConvalescent	Pos	4.68	0	0	0	0	0	0	0	0	0	0	0	1	0	1	1	1
11b								11b	Lyme	EarlyLymeConvalescent	3.29538	Neg	5.29706	Neg	0.769419	Neg	9.77399	Neg	3.24184	Neg	Neg	11b	Tufts	Lyme	EarlyLymeConvalescent	Neg	0.32	#NULL!	#NULL!	#NULL!	#NULL!	#NULL!	#NULL!	#NULL!	#NULL!	#NULL!	#NULL!	#NULL!	#NULL!	#NULL!	#NULL!	#NULL!	0
12b								12b	Lyme	EarlyLymeConvalescent	49.153	1	49.2898	1	35.4935	1	167.681	1	8.11235	Neg	1	12b	Tufts	Lyme	EarlyLymeConvalescent	Pos	3.87	1	0	1	1	0	1	0	0	1	1	0	1	1	1	1	1
13b								13b	Lyme	EarlyLymeConvalescent	169.906	1	176.949	1	74.773	1	487.313	1	18.3435	Neg	1	13b	Tufts	Lyme	EarlyLymeConvalescent	Pos	3.58	0	0	0	0	0	0	0	0	0	0	0	1	1	1	1	1
14b								14b	Lyme	EarlyLymeConvalescent	34.942	1	35.632	1	12.5352	1	453.008	1	21.9581	1	1	14b	Tufts	Lyme	EarlyLymeConvalescent	Pos	3.15	0	0	0	0	0	1	1	0	0	1	0	1	0	1	1	1
15b								15b	Lyme	EarlyLymeConvalescent	190.229	1	195.417	1	124.883	1	71.815	1	25.5114	1	1	15b	Tufts	Lyme	EarlyLymeConvalescent	Pos	3.39	0	0	0	0	0	0	0	0	0	0	0	1	1	1	1	1
17b								17b	Lyme	EarlyLymeConvalescent	68.5284	1	68.3895	1	50.8493	1	270.657	1	11.8801	Neg	1	17b	Tufts	Lyme	EarlyLymeConvalescent	Pos	4.11	1	0	0	1	1	1	1	0	0	1	1	1	1	1	1	1
18b								18b	Lyme	EarlyLymeConvalescent	30.5125	1	30.8922	1	19.9566	1	11.0209	Neg	16.4443	Neg	Neg	18b	Tufts	Lyme	EarlyLymeConvalescent	Pos	2	0	0	0	0	0	1	0	0	0	0	0	0	0	0	1	0
19b								19b	Lyme	EarlyLymeConvalescent	82.9529	1	82.7495	1	109.467	1	3.97548	Neg	7.80603	Neg	Neg	19b	Tufts	Lyme	EarlyLymeConvalescent	Pos	3.24	0	0	0	1	1	1	1	0	0	0	0	0	1	0	0	0
1b								1b	Lyme	EarlyLymeConvalescent	26.1756	1	26.5034	1	12.0525	1	133.778	1	14.5757	Neg	1	1b	Tufts	Lyme	EarlyLymeConvalescent	Pos	3.1	0	0	0	0	0	1	0	0	0	1	0	1	1	0	1	1
20b								20b	Lyme	EarlyLymeConvalescent	172.034	1	175.615	1	4.57066	Neg	633.606	1	91.3091	1	1	20b	Tufts	Lyme	EarlyLymeConvalescent	Pos	4.1	0	0	0	0	0	1	1	0	0	1	1	1	1	1	1	1
21b								21b	Lyme	EarlyLymeConvalescent	151.907	1	154.9	1	113.479	1	476.698	1	15.4028	Neg	1	21b	Tufts	Lyme	EarlyLymeConvalescent	Pos	4.42	1	0	1	1	1	1	1	0	0	1	0	1	1	1	1	1
22b								22b	Lyme	EarlyLymeConvalescent	3.82138	Neg	5.4375	Neg	2.15717	Neg	3.66782	Neg	5.84557	Neg	Neg	22b	Tufts	Lyme	EarlyLymeConvalescent	Neg	0.04	#NULL!	#NULL!	#NULL!	#NULL!	#NULL!	#NULL!	#NULL!	#NULL!	#NULL!	#NULL!	#NULL!	#NULL!	#NULL!	#NULL!	#NULL!	0
23b								23b	Lyme	EarlyLymeConvalescent	120.746	1	124.109	1	10.4837	1	468.084	1	55.9291	1	1	23b	Tufts	Lyme	EarlyLymeConvalescent	Pos	3.05	0	0	0	0	0	0	0	0	0	1	0	1	1	1	1	1
24b								24b	Lyme	EarlyLymeConvalescent	47.1989	1	47.4289	1	15.2202	1	2.03721	Neg	14.6064	Neg	Neg	24b	Tufts	Lyme	EarlyLymeConvalescent	Pos	2.38	0	0	0	0	1	1	1	0	0	0	0	0	0	0	0	0
25b								25b	Lyme	EarlyLymeConvalescent	127.001	1	132.535	1	106.752	1	85.3521	1	20.9166	1	1	25b	Tufts	Lyme	EarlyLymeConvalescent	Pos	4.88	1	1	0	1	1	1	1	1	1	1	1	1	0	1	1	1
26b								26b	Lyme	EarlyLymeConvalescent	119.198	1	123.231	1	96.7357	1	50.5863	Neg	13.5955	Neg	1	26b	Tufts	Lyme	EarlyLymeConvalescent	Pos	5.8	1	0	1	1	1	1	1	0	0	1	1	1	1	1	1	1
27b								27b	Lyme	EarlyLymeConvalescent	78.1846	1	79.1683	1	108.019	1	457.316	1	6.67264	Neg	1	27b	Tufts	Lyme	EarlyLymeConvalescent	Pos	3.64	1	0	1	1	1	1	1	0	0	1	0	0	0	0	1	1
28b								28b	Lyme	EarlyLymeConvalescent	90.8758	1	91.527	1	153.422	1	60.1238	1	9.52142	Neg	Neg	28b	Tufts	Lyme	EarlyLymeConvalescent	Pos	2.51	0	0	0	0	0	1	0	0	0	0	0	0	0	0	1	0
29b								29b	Lyme	EarlyLymeConvalescent	26.7686	1	27.5918	1	15.371	1	353.357	1	20.7634	1	Neg	29b	Tufts	Lyme	EarlyLymeConvalescent	Pos	1.25	0	0	0	0	0	0	0	0	0	0	0	0	0	0	1	0
2b								2b	Lyme	EarlyLymeConvalescent	17.8524	Neg	18.8846	Neg	1.34262	Neg	203.31	1	31.7603	1	1	2b	Tufts	Lyme	EarlyLymeConvalescent	Pos	1.85	0	0	0	0	0	0	0	0	0	0	0	1	0	1	1	1
30b								30b	Lyme	EarlyLymeConvalescent	204.572	1	208.162	1	88.6204	1	383.784	1	56.2354	1	1	30b	Tufts	Lyme	EarlyLymeConvalescent	Pos	5.16	1	0	1	1	1	1	1	0	0	1	1	1	1	1	1	1
31b								31b	Lyme	EarlyLymeConvalescent	3.52381	Neg	4.98107	Neg	5.89808	Neg	9.7903	Neg	8.08172	Neg	Neg	31b	Tufts	Lyme	EarlyLymeConvalescent	Pos	1.39	0	0	0	0	0	0	0	0	0	0	0	0	1	0	0	0
32b								32b	Lyme	EarlyLymeConvalescent	136.534	1	139.241	1	89.9478	1	89.6286	1	67.1098	1	1	32b	Tufts	Lyme	EarlyLymeConvalescent	Pos	6.13	1	1	1	1	0	1	1	1	1	1	1	1	1	1	1	1
33b								33b	Lyme	EarlyLymeConvalescent	238.832	1	241.516	1	83.2202	1	74.6455	1	33.3226	1	1	33b	Tufts	Lyme	EarlyLymeConvalescent	Pos	5.41	1	0	0	0	1	1	1	0	0	1	1	1	1	1	1	1
34b								34b	Lyme	EarlyLymeConvalescent	65.308	1	65.1594	1	27.1669	1	22.8352	Neg	49.8333	1	1	34b	Tufts	Lyme	EarlyLymeConvalescent	Pos	7.1	1	1	1	1	1	1	1	1	1	0	1	1	1	1	1	1
35b								35b	Lyme	EarlyLymeConvalescent	276.017	1	276.521	1	97.1882	1	17.8203	Neg	47.1989	1	1	35b	Tufts	Lyme	EarlyLymeConvalescent	Pos	5.67	1	1	1	1	1	1	1	1	1	1	1	1	1	1	1	1
36b								36b	Lyme	EarlyLymeConvalescent	7.65388	Neg	8.9836	Neg	9.03561	Neg	75.8146	1	6.48885	Neg	1	36b	Tufts	Lyme	EarlyLymeConvalescent	Pos	4.41	0	0	0	0	0	1	1	0	0	0	0	1	1	0	1	1
37b								37b	Lyme	EarlyLymeConvalescent	74.3531	1	76.3595	1	65.6319	1	2.40641	Neg	18.5579	Neg	Neg	37b	Tufts	Lyme	EarlyLymeConvalescent	Equiv	0.92	0	0	0	0	0	0	1	0	0	0	1	0	0	0	0	0
38b								38b	Lyme	EarlyLymeConvalescent	240.352	1	246.256	1	54.8315	1	18.4048	Neg	37.366	1	1	38b	Tufts	Lyme	EarlyLymeConvalescent	Pos	2.44	0	0	0	0	0	0	0	0	0	0	1	1	1	0	1	1
39b								39b	Lyme	EarlyLymeConvalescent	119.405	1	122.494	1	131.55	1	500.696	1	7.92855	Neg	1	39b	Tufts	Lyme	EarlyLymeConvalescent	Pos	6.25	1	0	1	1	1	1	1	1	0	1	1	1	1	1	1	1
3b								3b	Lyme	EarlyLymeConvalescent	25.9968	1	26.8545	1	13.7419	1	24.7427	Neg	6.61137	Neg	1	3b	Tufts	Lyme	EarlyLymeConvalescent	Pos	3.06	0	0	0	0	0	0	0	0	0	0	0	1	1	1	1	1
40b								40b	Lyme	EarlyLymeConvalescent	76.5845	1	77.9043	1	77.5787	1	28.9269	Neg	9.27637	Neg	Neg	40b	Tufts	Lyme	EarlyLymeConvalescent	Pos	3.6	0	0	0	0	0	1	1	1	0	0	0	0	0	0	1	0
4b								4b	Lyme	EarlyLymeConvalescent	41.2808	1	41.7411	1	20.0471	1	193.342	1	18.4047	Neg	1	4b	Tufts	Lyme	EarlyLymeConvalescent	Pos	4.43	0	0	0	0	0	1	0	0	0	1	0	1	1	0	1	1
5b								5b	Lyme	EarlyLymeConvalescent	12.9669	Neg	14.0745	Neg	8.7641	Neg	-0.362552	Neg	5.78431	Neg	Neg	5b	Tufts	Lyme	EarlyLymeConvalescent	Equiv	0.88	0	0	0	0	0	0	0	0	0	0	0	0	1	0	0	0
6b								6b	Lyme	EarlyLymeConvalescent	344.06	1	339.052	1	150.406	1	288.409	1	23.2446	1	Neg	6b	Tufts	Lyme	EarlyLymeConvalescent	Neg	0.26	#NULL!	#NULL!	#NULL!	#NULL!	#NULL!	#NULL!	#NULL!	#NULL!	#NULL!	#NULL!	#NULL!	#NULL!	#NULL!	#NULL!	#NULL!	0
7b								7b	Lyme	EarlyLymeConvalescent	48.2632	1	47.9907	1	10.0312	1	664.065	1	115.508	1	Neg	7b	Tufts	Lyme	EarlyLymeConvalescent	Pos	1.81	0	0	0	0	0	0	0	0	0	0	0	0	0	0	1	0
8b								8b	Lyme	EarlyLymeConvalescent	69.9272	1	69.9344	1	55.1634	1	78.1836	1	9.76648	Neg	1	8b	Tufts	Lyme	EarlyLymeConvalescent	Pos	2.94	0	0	0	0	0	0	0	0	0	0	0	1	1	0	1	1
90-2622								90-2622	Lyme	EarlyLymeConvalescent	45.2526	1	45.8207	1	75.5117	1	230.976	1	21.1937	1	1	90-2622	CDC	Lyme	EarlyLymeConvalescent	Pos	5.4	1	0	0	1	1	1	1	0	0	1	0	1	1	1	1	1
90-2631								90-2631	Lyme	EarlyLymeConvalescent	6.93428	Neg	6.62923	Neg	4.16053	Neg	4.85748	Neg	20.0547	1	Neg	90-2631	CDC	Lyme	EarlyLymeConvalescent	Neg	0.18	0	0	0	0	0	0	0	0	0	0	0	0	0	0	0	0
91-1104								91-1104	Lyme	EarlyLymeConvalescent	16.9008	Neg	16.6735	Neg	29.0292	1	206.191	1	19.3112	Neg	1	91-1104	CDC	Lyme	EarlyLymeConvalescent	Pos	3.61	0	0	0	0	0	1	0	0	0	1	0	1	1	1	1	1
91-1222								91-1222	Lyme	EarlyLymeConvalescent	48.9547	1	51.1714	1	49.3011	1	368.662	1	25.3811	1	1	91-1222	CDC	Lyme	EarlyLymeConvalescent	Pos	3.91	0	0	1	0	1	1	0	0	0	0	0	1	1	1	1	1
91-1347								91-1347	Lyme	EarlyLymeConvalescent	25.5039	1	25.7556	1	21.9198	1	102.34	1	46.4721	1	1	91-1347	CDC	Lyme	EarlyLymeConvalescent	Pos	3.49	0	0	0	0	1	1	0	0	0	0	0	1	1	1	1	1
91-1348								91-1348	Lyme	EarlyLymeConvalescent	121.338	1	128.78	1	97.9535	1	94.1484	1	23.3389	1	1	91-1348	CDC	Lyme	EarlyLymeConvalescent	Pos	4.77	1	0	0	1	1	1	1	1	0	1	1	1	1	0	1	1
91-1349								91-1349	Lyme	EarlyLymeConvalescent	22.7469	1	22.9395	Neg	11.4984	1	107.661	1	25.0617	1	1	91-1349	CDC	Lyme	EarlyLymeConvalescent	Pos	2.8	0	0	0	0	0	1	1	0	0	1	1	1	1	1	1	1
91-1350								91-1350	Lyme	EarlyLymeConvalescent	14.8666	Neg	14.6787	Neg	11.8695	1	14.6623	Neg	21.6804	1	1	91-1350	CDC	Lyme	EarlyLymeConvalescent	Pos	1.45	0	0	0	0	0	1	0	0	0	0	1	1	1	1	1	1
91-1351								91-1351	Lyme	EarlyLymeConvalescent	28.0712	1	27.9616	1	15.41	1	102.026	1	23.9291	1	1	91-1351	CDC	Lyme	EarlyLymeConvalescent	Pos	2.27	0	1	0	1	0	1	0	0	0	1	0	1	1	0	1	1
91-1352								91-1352	Lyme	EarlyLymeConvalescent	19.1234	Neg	18.8795	Neg	22.9191	1	2.51103	Neg	26.5273	1	Neg	91-1352	CDC	Lyme	EarlyLymeConvalescent	Neg	0.59	0	0	0	0	0	1	0	0	0	0	0	0	1	0	0	0
91-1353								91-1353	Lyme	EarlyLymeConvalescent	15.6174	Neg	15.4767	Neg	2.96135	Neg	13.0491	Neg	22.2254	1	1	91-1353	CDC	Lyme	EarlyLymeConvalescent	Neg	0.53	0	0	0	0	0	0	0	0	0	1	0	1	1	1	1	1
91-1354								91-1354	Lyme	EarlyLymeConvalescent	11.9295	Neg	11.7218	Neg	9.21421	Neg	1.63111	Neg	19.2428	Neg	Neg	91-1354	CDC	Lyme	EarlyLymeConvalescent	Pos	1.75	0	0	0	0	0	1	0	0	0	0	0	0	1	0	0	0
91-1458								91-1458	Lyme	EarlyLymeConvalescent	7.87966	Neg	7.63835	Neg	3.81791	Neg	3.5376	Neg	19.8004	1	Neg	91-1458	CDC	Lyme	EarlyLymeConvalescent	Neg	0.05	0	0	0	0	0	1	0	0	0	1	0	0	0	0	0	0
91-1841								91-1841	Lyme	EarlyLymeConvalescent	9.10357	Neg	8.90562	Neg	5.84509	Neg	13.3005	Neg	19.3995	Neg	1	91-1841	CDC	Lyme	EarlyLymeConvalescent	Equiv	0.99	0	0	0	0	0	1	0	0	0	0	0	1	1	0	1	1
91-1842								91-1842	Lyme	EarlyLymeConvalescent	24.364	1	23.9955	Neg	18.8647	1	4.89939	Neg	19.2867	Neg	1	91-1842	CDC	Lyme	EarlyLymeConvalescent	Pos	2.58	1	0	0	1	1	1	1	0	0	1	0	0	0	0	1	1
91-1843								91-1843	Lyme	EarlyLymeConvalescent	18.4264	Neg	18.1285	Neg	8.18635	Neg	52.1217	Neg	22.4552	1	1	91-1843	CDC	Lyme	EarlyLymeConvalescent	Equiv	0.95	0	0	0	0	0	1	0	0	0	0	0	1	1	0	1	1
91-1844								91-1844	Lyme	EarlyLymeConvalescent	24.5554	1	24.2302	Neg	106.319	1	174.954	1	22.3445	1	1	91-1844	CDC	Lyme	EarlyLymeConvalescent	Pos	1.89	1	0	1	1	1	1	0	0	0	1	1	1	1	0	1	1
91-1845								91-1845	Lyme	EarlyLymeConvalescent	17.4414	Neg	17.3072	Neg	5.33116	Neg	0.772143	Neg	20.1768	1	Neg	91-1845	CDC	Lyme	EarlyLymeConvalescent	Pos	1.3	0	0	0	0	0	1	0	0	0	0	0	0	1	0	0	0
91-1846								91-1846	Lyme	EarlyLymeConvalescent	10.1456	Neg	9.98515	Neg	5.13129	Neg	1.67301	Neg	19.7252	1	Neg	91-1846	CDC	Lyme	EarlyLymeConvalescent	Neg	0.57	0	0	0	0	0	0	0	0	0	0	0	0	1	0	0	0
91-1847								91-1847	Lyme	EarlyLymeConvalescent	21.705	Neg	22.1784	Neg	27.1162	1	1.27495	Neg	4.6322	Neg	1	91-1847	CDC	Lyme	EarlyLymeConvalescent	Pos	1.58	0	0	0	0	1	1	1	0	0	1	0	1	1	1	1	1
92-1682								92-1682	Lyme	EarlyLymeConvalescent	3.76301	Neg	3.2868	Neg	8.04359	Neg	5.92596	Neg	19.827	1	Neg	92-1682	CDC	Lyme	EarlyLymeConvalescent	Neg	0.58	0	0	0	0	0	0	0	0	0	0	0	0	1	0	0	0
92-1941								92-1941	Lyme	EarlyLymeConvalescent	8.79707	Neg	8.62401	Neg	5.38826	Neg	25.4727	Neg	18.7164	Neg	1	92-1941	CDC	Lyme	EarlyLymeConvalescent	Pos	1.59	0	0	0	0	0	0	0	0	0	0	0	1	1	0	1	1
92-1982								92-1982	Lyme	EarlyLymeConvalescent	13.7206	Neg	13.6931	Neg	8.38621	Neg	21.0731	Neg	19.1448	Neg	Neg	92-1982	CDC	Lyme	EarlyLymeConvalescent	Equiv	0.93	0	0	0	0	1	1	0	0	0	1	0	0	0	0	1	0
93-0208								93-0208	Lyme	EarlyLymeConvalescent	4.68364	Neg	4.07512	Neg	4.16053	Neg	2.99289	Neg	19.2922	Neg	Neg	93-0208	CDC	Lyme	EarlyLymeConvalescent	Pos	1.29	0	0	0	0	0	1	0	0	0	0	0	0	0	0	1	0
93-1414								93-1414	Lyme	EarlyLymeConvalescent	162.871	1	170.741	1	30.9148	1	490.915	1	112.363	1	1	93-1414	CDC	Lyme	EarlyLymeConvalescent	Pos	3.87	1	0	0	0	1	1	1	0	0	1	1	1	1	1	1	1
93-1426								93-1426	Lyme	EarlyLymeConvalescent	30.8741	1	31.0828	1	25.1427	1	66.5701	1	19.596	1	1	93-1426	CDC	Lyme	EarlyLymeConvalescent	Pos	1.85	1	0	0	1	1	1	1	0	0	0	1	0	0	0	1	1
9b								9b	Lyme	EarlyLymeConvalescent	23.1217	1	23.7649	Neg	16.1554	1	674.525	1	6.76454	Neg	Neg	9b	Tufts	Lyme	EarlyLymeConvalescent	Pos	4.3	0	0	0	0	0	0	0	0	0	0	0	0	0	0	1	0
D101	4.56	23.39.41	1.0	23.39.41.45.66	1.0	1.0	2	D101	Lyme	EarlyLymeConvalescent	262.265	1	262.731	1	87.4639	1	517.817	1	59.1655	1	1		NYMC	Lyme	EarlyLymeConvalescent	Pos	4.56	1	0	1	0	1	1	1	0	0	1	0	1	1	1	1	1
D104	.85	39	.00	41	.00	.00	2	D104	Lyme	EarlyLymeConvalescent	52.9097	1	55.4182	1	32.4665	1	-1.93159	Neg	-3.4575	Neg	Neg		NYMC	Lyme	EarlyLymeConvalescent	Equiv	0.85	0	0	0	0	0	1	0	0	0	0	0	0	0	1	0	0
D105	2.34	23.39.41	1.0	23.41	.00	1.0	2	D105	Lyme	EarlyLymeConvalescent	57.7104	1	63.0647	1	23.9303	1	604.608	1	39.8088	1	1		NYMC	Lyme	EarlyLymeConvalescent	Pos	2.34	0	0	0	0	0	1	0	0	0	1	0	1	1	1	1	1
D107	2.31	23.39.41	1.0	41.66	.00	1.0	2	D107	Lyme	EarlyLymeConvalescent	2.35826	Neg	0.178119	Neg	6.90562	Neg	128.03	1	8.10199	Neg	1		NYMC	Lyme	EarlyLymeConvalescent	Pos	2.31	0	0	1	0	0	1	0	0	0	0	0	1	1	1	1	1
D108	2.57	23.39.41	1.0	23.41.58.66	.00	1.0	2	D108	Lyme	EarlyLymeConvalescent	3.1168	Neg	1.10497	Neg	5.09853	Neg	596.604	1	23.3965	1	1		NYMC	Lyme	EarlyLymeConvalescent	Pos	2.57	0	0	1	1	0	1	0	0	0	1	0	1	1	1	1	1
D109	2.69	23.39.41	1.0	41	.00	1.0	2	D109	Lyme	EarlyLymeConvalescent	37.4837	1	38.0398	1	18.2475	1	32.86	Neg	33.5111	1	1		NYMC	Lyme	EarlyLymeConvalescent	Pos	2.69	0	0	0	0	0	1	0	0	0	0	0	1	1	1	1	1
D111	3.28	23.41	1.0		.00	1.0	2	D111	Lyme	EarlyLymeConvalescent	21.4261	Neg	20.2675	Neg	32.2762	1	181.656	1	6.41169	Neg	1		NYMC	Lyme	EarlyLymeConvalescent	Pos	3.28	0	0	0	0	0	0	0	0	0	0	0	1	1	0	1	1
D112	1.49	41	.00	41	.00	.00	2	D112	Lyme	EarlyLymeConvalescent	20.059	Neg	18.6919	Neg	20.2686	1	5.82211	Neg	11.0191	Neg	Neg		NYMC	Lyme	EarlyLymeConvalescent	Pos	1.49	0	0	0	0	0	1	0	0	0	0	0	0	1	0	0	0
D113	2.31		.00	18.28.30.39.41.45.58.60.66.93	1.0	1.0	2	D113	Lyme	EarlyLymeConvalescent	88.2754	1	97.8446	1	32.086	1	14.076	Neg	8.42915	Neg	1		NYMC	Lyme	EarlyLymeConvalescent	Pos	2.31	1	1	1	1	1	1	1	1	1	0	1	0	0	0	0	1
D114	1.96	23.41	1.0	23.41	.00	1.0	2	D114	Lyme	EarlyLymeConvalescent	-0.0697684	Neg	-2.32437	Neg	5.3363	Neg	79.1571	1	2.8675	Neg	1		NYMC	Lyme	EarlyLymeConvalescent	Pos	1.96	0	0	0	0	0	1	0	0	0	1	0	1	1	0	1	1
D115	2.00	23.41	1.0		.00	1.0	2	D115	Lyme	EarlyLymeConvalescent	10.7471	Neg	8.79779	Neg	2.12634	Neg	18.8283	Neg	17.2624	Neg	1		NYMC	Lyme	EarlyLymeConvalescent	Pos	2	0	0	0	0	0	0	0	0	0	0	0	1	1	0	1	1
D117	3.11	23.41	1.0	23.28.39.41	.00	1.0	2	D117	Lyme	EarlyLymeConvalescent	77.3515	1	85.2627	1	48.8967	1	78.0066	1	3.05835	Neg	1		NYMC	Lyme	EarlyLymeConvalescent	Pos	3.11	0	0	0	0	0	1	1	0	1	1	0	1	1	0	1	1
D119	.60					.00	2	D119	Lyme	EarlyLymeConvalescent	25.5705	1	24.8554	1	5.7643	Neg	1.77017	Neg	6.68432	Neg	Neg		NYMC	Lyme	EarlyLymeConvalescent	Neg	0.6	#NULL!	#NULL!	#NULL!	#NULL!	#NULL!	#NULL!	#NULL!	#NULL!	#NULL!	#NULL!	#NULL!	#NULL!	#NULL!	#NULL!	#NULL!	0
D120	1.42	23	.00	41	.00	.00	2	D120	Lyme	EarlyLymeConvalescent	18.0604	Neg	16.5138	Neg	13.2542	1	20.8793	Neg	20.9701	1	Neg		NYMC	Lyme	EarlyLymeConvalescent	Pos	1.42	0	0	0	0	0	1	0	0	0	0	0	0	0	0	1	0
D121	1.42	23.41	1.0	23.41.45	.00	1.0	2	D121	Lyme	EarlyLymeConvalescent	36.2344	1	37.8081	1	21.0532	1	40.5887	Neg	4.83044	Neg	1		NYMC	Lyme	EarlyLymeConvalescent	Pos	1.42	0	0	0	0	1	1	0	0	0	1	0	1	1	0	1	1
D123	1.82	23.39	1.0	23.39.41.58	.00	1.0	2	D123	Lyme	EarlyLymeConvalescent	59.2953	1	65.0111	1	42.0964	1	56.3712	1	12.3823	Neg	1		NYMC	Lyme	EarlyLymeConvalescent	Pos	1.82	0	0	0	1	0	1	1	0	0	1	0	1	0	1	1	1
D124	6.52	23	.00	18.23.28.30.39.41.45.58.60.93	1.0	1.0	2	D124	Lyme	EarlyLymeConvalescent	71.9409	1	81.7406	1	51.536	1	14.4512	Neg	11.1009	Neg	1		NYMC	Lyme	EarlyLymeConvalescent	Pos	6.52	1	1	0	1	1	1	1	1	1	1	1	0	0	0	1	1
D133	.93	23	.00	41	.00	.00	2	D133	Lyme	EarlyLymeConvalescent	1.57997	Neg	-0.563359	Neg	6.59651	Neg	17.5277	Neg	10.6647	Neg	Neg		NYMC	Lyme	EarlyLymeConvalescent	Equiv	0.93	0	0	0	0	0	1	0	0	0	0	0	0	0	0	1	0
D134	3.65	23	.00	41	.00	.00	2	D134	Lyme	EarlyLymeConvalescent	10.6957	Neg	8.86731	Neg	12.8024	1	21.7797	Neg	9.92861	Neg	Neg		NYMC	Lyme	EarlyLymeConvalescent	Pos	3.65	0	0	0	0	0	1	0	0	0	0	0	0	0	0	1	0
D136	3.83	23.41	1.0	41	.00	1.0	2	D136	Lyme	EarlyLymeConvalescent	10.4036	Neg	8.54291	Neg	7.07206	Neg	281.053	1	16.09	Neg	1		NYMC	Lyme	EarlyLymeConvalescent	Pos	3.83	0	0	0	0	0	1	0	0	0	0	0	1	1	0	1	1
D137	6.20		.00	18.28.30.39.41.45.58.60.66	1.0	1.0	2	D137	Lyme	EarlyLymeConvalescent	114.159	1	123.565	1	65.3508	1	12.9255	Neg	3.79445	Neg	1		NYMC	Lyme	EarlyLymeConvalescent	Pos	6.2	1	0	1	1	1	1	1	1	1	0	1	0	0	0	0	1
D138	1.76	23.39	1.0	23.41.45	.00	1.0	2	D138	Lyme	EarlyLymeConvalescent	8.01148	Neg	6.10994	Neg	18.8657	1	122.203	1	4.47602	Neg	1		NYMC	Lyme	EarlyLymeConvalescent	Pos	1.76	0	0	0	0	1	1	0	0	0	1	0	1	0	1	1	1
D139	5.05	23.41	1.0	18.23.39.41.45.58.60.66	1.0	1.0	2	D139	Lyme	EarlyLymeConvalescent	30.8344	1	30.3933	1	23.7877	1	10.8745	Neg	28.0312	1	1		NYMC	Lyme	EarlyLymeConvalescent	Pos	5.05	1	0	1	1	1	1	1	0	0	1	1	1	1	0	1	1
D141	2.41		.00		.00	.00	2	D141	Lyme	EarlyLymeConvalescent	19.621	Neg	18.2053	Neg	19.151	1	36.3867	Neg	6.22085	Neg	Neg		NYMC	Lyme	EarlyLymeConvalescent	Pos	2.41	0	0	0	0	0	0	0	0	0	0	0	0	0	0	0	0
D142	3.96	23.41	1.0	18.39.41.58.66	1.0	1.0	2	D142	Lyme	EarlyLymeConvalescent	210.833	1	210.758	1	76.2647	1	96.3903	1	110.474	1	1		NYMC	Lyme	EarlyLymeConvalescent	Pos	3.96	1	0	1	1	0	1	1	0	0	0	1	1	1	0	1	1
D145	5.19	23.41	1.0	18.23.39.41.45.58	1.0	1.0	2	D145	Lyme	EarlyLymeConvalescent	109.133	1	117.193	1	61.4275	1	441.78	1	26.4772	1	1		NYMC	Lyme	EarlyLymeConvalescent	Pos	5.19	1	0	0	1	1	1	1	0	0	1	1	1	1	0	1	1
D147	3.55	23.41	1.0	23.41	.00	1.0	2	D147	Lyme	EarlyLymeConvalescent	182.711	1	189.139	1	51.7738	1	278.952	1	39.1	1	1		NYMC	Lyme	EarlyLymeConvalescent	Pos	3.55	0	0	0	0	0	1	0	0	0	1	0	1	1	0	1	1
D148	3.23	23.41	1.0	18.23.28.39.41.45.58.66	1.0	1.0	2	D148	Lyme	EarlyLymeConvalescent	275.335	1	275.938	1	70.2014	1	11.95	Neg	20.4249	1	1		NYMC	Lyme	EarlyLymeConvalescent	Pos	3.23	1	0	1	1	1	1	1	0	1	1	1	1	1	0	1	1
D149	1.51	23.39	1.0	41	.00	1.0	2	D149	Lyme	EarlyLymeConvalescent	38.3463	1	40.1252	1	28.4718	1	373.748	1	9.24704	Neg	1		NYMC	Lyme	EarlyLymeConvalescent	Pos	1.51	0	0	0	0	0	1	0	0	0	0	0	1	0	1	1	1
D150	1.13	23	.00		.00	.00	2	D150	Lyme	EarlyLymeConvalescent	22.9643	1	22.7468	Neg	4.71809	Neg	59.5227	1	11.9188	Neg	Neg		NYMC	Lyme	EarlyLymeConvalescent	Pos	1.13	0	0	0	0	0	0	0	0	0	0	0	0	0	0	1	0
D152	1.76	41	.00	41	.00	.00	2	D152	Lyme	EarlyLymeConvalescent	33.2186	1	34.0775	1	22.0043	1	8.9486	Neg	20.6157	1	Neg		NYMC	Lyme	EarlyLymeConvalescent	Pos	1.76	0	0	0	0	0	1	0	0	0	0	0	0	1	0	0	0
D153	7.17	23.41	1.0	18.23.41.45.66	1.0	1.0	2	D153	Lyme	EarlyLymeConvalescent	164.22	1	175.538	1	60.7142	1	525.82	1	13.0366	Neg	1		NYMC	Lyme	EarlyLymeConvalescent	Pos	7.17	1	0	1	0	1	1	0	0	0	1	1	1	1	0	1	1
D86	2.40	23	.00	23.39.41.66	.00	.00	2	D86	Lyme	EarlyLymeConvalescent	28.9889	1	29.0262	1	4.97964	Neg	205.142	1	4.23065	Neg	Neg		NYMC	Lyme	EarlyLymeConvalescent	Pos	2.4	0	0	1	0	0	1	1	0	0	1	0	0	0	0	1	0
D87	2.15	23.41	1.0	23.41	.00	1.0	2	D87	Lyme	EarlyLymeConvalescent	1.157	Neg	-1.07312	Neg	1.41301	Neg	175.078	1	2.67666	Neg	1		NYMC	Lyme	EarlyLymeConvalescent	Pos	2.15	0	0	0	0	0	1	0	0	0	1	0	1	1	0	1	1
D88	2.87		.00	41	.00	.00	2	D88	Lyme	EarlyLymeConvalescent	187.861	1	194.7	1	3.55299	Neg	-2.65694	Neg	2.62214	Neg	Neg		NYMC	Lyme	EarlyLymeConvalescent	Pos	2.87	0	0	0	0	0	1	0	0	0	0	0	0	0	0	0	0
D89	.17					.00	2	D89	Lyme	EarlyLymeConvalescent	10.82	Neg	8.89048	Neg	4.19498	Neg	3.52101	Neg	7.61126	Neg	Neg		NYMC	Lyme	EarlyLymeConvalescent	Neg	0.17	#NULL!	#NULL!	#NULL!	#NULL!	#NULL!	#NULL!	#NULL!	#NULL!	#NULL!	#NULL!	#NULL!	#NULL!	#NULL!	#NULL!	#NULL!	0
D91	3.41	23.41	1.0	18.23.39.41.45	1.0	1.0	2	D91	Lyme	EarlyLymeConvalescent	123.877	1	132.346	1	53.8187	1	40.0384	Neg	7.31137	Neg	1		NYMC	Lyme	EarlyLymeConvalescent	Pos	3.41	1	0	0	0	1	1	1	0	0	1	1	1	1	0	1	1
D92	3.67	23.39.41	1.0	39.41	.00	1.0	2	D92	Lyme	EarlyLymeConvalescent	49.5326	1	51.5023	1	64.6374	1	301.813	1	143.572	1	1		NYMC	Lyme	EarlyLymeConvalescent	Pos	3.67	0	0	0	0	0	1	1	0	0	0	0	1	1	1	1	1
D93	4.99	23.41	1.0	39.41.66	.00	1.0	2	D93	Lyme	EarlyLymeConvalescent	43.7606	1	44.4351	1	40.2893	1	115.074	1	12.0006	Neg	1		NYMC	Lyme	EarlyLymeConvalescent	Pos	4.99	0	0	1	0	0	1	1	0	0	0	0	1	1	0	1	1
D94	2.84	23.41	1.0	23.39.41.45.58.60.66	1.0	1.0	2	D94	Lyme	EarlyLymeConvalescent	8.54392	Neg	6.45751	Neg	5.47897	Neg	124.129	1	8.72904	Neg	1		NYMC	Lyme	EarlyLymeConvalescent	Pos	2.84	1	0	1	1	1	1	1	0	0	1	0	1	1	0	1	1
D95	1.75	23.41	1	41	0	1.0	2	D95	Lyme	EarlyLymeConvalescent	54.4286	1	57.3182	1	26.641	1	13.4257	Neg	29.4216	1	1		NYMC	Lyme	EarlyLymeConvalescent	Pos	1.75	0	0	0	0	0	1	0	0	0	0	0	1	1	0	1	1
42								42	Lyme	EarlyNeurological	31.3546	1	31.4193	1	5.83476	Neg	8.50947	Neg	5.10693	Neg	1	42	Tufts	Lyme	EarlyNeurological	Pos	2.73	1	1	1	1	1	1	1	0	1	0	1	0	1	0	0	1
44								44	Lyme	EarlyNeurological	300.112	1	302.954	1	16.08	1	41.3114	Neg	27.846	1	1	44	Tufts	Lyme	EarlyNeurological	Pos	2.61	1	1	0	1	0	1	1	1	0	0	0	1	1	1	1	1
45								45	Lyme	EarlyNeurological	324.59	1	324.446	1	9.48206	Neg	102.579	1	29.4488	1	Neg	45	Tufts	Lyme	EarlyNeurological	Pos	4.72	0	0	0	1	1	1	1	0	0	0	0	0	1	0	0	0
46								46	Lyme	EarlyNeurological	59.3831	1	59.4542	1	5.34299	Neg	580.971	1	17.0942	Neg	1	46	Tufts	Lyme	EarlyNeurological	Pos	5.32	0	0	0	0	0	1	0	0	0	1	0	1	1	0	1	1
47								47	Lyme	EarlyNeurological	212.877	1	217.077	1	46.078	1	47.9314	Neg	28.614	1	1	47	Tufts	Lyme	EarlyNeurological	Pos	5.98	1	1	1	1	0	1	1	1	1	1	1	1	1	0	1	1
48								48	Lyme	EarlyNeurological	190.626	1	193.54	1	39.7669	1	262.716	1	19.4315	Neg	1	48	Tufts	Lyme	EarlyNeurological	Pos	2.58	1	0	1	0	1	1	1	0	0	1	1	1	1	0	1	1
49								49	Lyme	EarlyNeurological	336.395	1	334.124	1	39.644	1	30.7525	Neg	48.5148	1	1	49	Tufts	Lyme	EarlyNeurological	Pos	7.24	1	1	1	1	1	1	1	1	1	1	1	1	1	1	1	1
50								50	Lyme	EarlyNeurological	218.842	1	221.848	1	8.58048	Neg	576.337	1	46.0773	1	1	50	Tufts	Lyme	EarlyNeurological	Pos	5.98	1	1	1	1	1	1	1	1	1	1	1	1	1	1	1	1
51								51	Lyme	EarlyNeurological	168.835	1	173.003	1	22.7599	1	700.792	1	27.1448	1	1	51	Tufts	Lyme	EarlyNeurological	Pos	2.64	1	0	0	1	1	1	1	0	0	1	1	1	1	1	1	1
54								54	Lyme	EarlyNeurological	143.419	1	147.921	1	18.8667	1	11.3892	Neg	23.9059	1	1	54	Tufts	Lyme	EarlyNeurological	Pos	3.95	1	1	1	1	1	1	1	1	0	1	1	1	1	1	1	1
56								56	Lyme	EarlyNeurological	172.987	1	177.683	1	44.8076	1	11.7202	Neg	22.4367	1	1	56	Tufts	Lyme	EarlyNeurological	Pos	5.45	1	0	1	1	1	1	1	0	1	0	1	1	1	1	1	1
57								57	Lyme	EarlyNeurological	93.9928	1	94.1231	1	17.5143	1	661.403	1	21.5018	1	1	57	Tufts	Lyme	EarlyNeurological	Pos	4.51	0	0	0	0	0	1	1	1	0	0	1	1	1	1	1	1
58								58	Lyme	EarlyNeurological	176.805	1	180.045	1	10.9574	1	12.9448	Neg	16.9606	Neg	Neg	58	Tufts	Lyme	EarlyNeurological	Pos	3.93	0	0	0	1	1	1	1	0	0	0	0	0	1	0	0	0
59								59	Lyme	EarlyNeurological	121.687	1	121.295	1	7.80184	Neg	59.8142	1	55.193	1	1	59	Tufts	Lyme	EarlyNeurological	Pos	3.02	1	0	1	1	1	0	1	1	0	0	1	1	1	1	0	1
60								60	Lyme	EarlyNeurological	220.553	1	221.575	1	5.50691	Neg	715.687	1	48.0474	1	1	60	Tufts	Lyme	EarlyNeurological	Pos	3.83	0	0	0	0	0	0	0	0	0	0	0	1	1	1	1	1
41								41	Lyme	EarlyNeurologicalConvalescent	31.8429	1	33.0092	1	13.2113	1	3.3128	Neg	5.74136	Neg	Neg	41	Tufts	Lyme	EarlyNeurologicalConvalescent	Pos	2.22	0	0	1	0	0	1	0	0	0	0	0	0	0	0	0	0
43								43	Lyme	EarlyNeurologicalConvalescent	7.27623	Neg	8.88228	Neg	8.29361	Neg	10.2307	Neg	6.70969	Neg	Neg	43	Tufts	Lyme	EarlyNeurologicalConvalescent	Pos	1.2	0	0	0	0	0	0	0	0	0	0	0	0	0	0	1	0
52								52	Lyme	EarlyNeurologicalConvalescent	8.20448	Neg	9.65472	Neg	5.67084	Neg	85.1025	1	6.77647	Neg	1	52	Tufts	Lyme	EarlyNeurologicalConvalescent	Pos	2.54	0	0	0	0	0	1	0	0	0	0	1	1	1	1	1	1
53								53	Lyme	EarlyNeurologicalConvalescent	86.4219	1	86.1261	1	18.4569	1	239.91	1	16.3596	Neg	1	53	Tufts	Lyme	EarlyNeurologicalConvalescent	Pos	4.23	1	1	1	1	1	1	1	0	0	1	1	1	1	1	1	1
55								55	Lyme	EarlyNeurologicalConvalescent	298.637	1	299.137	1	5.0971	Neg	42.5692	Neg	38.4642	1	1	55	Tufts	Lyme	EarlyNeurologicalConvalescent	Pos	2.72	1	0	0	1	1	1	1	0	1	1	1	1	1	1	1	1
90-2436								90-2436	Lyme	EarlyNeurologicalConvalescent	8.33068	Neg	7.91997	Neg	5.64523	Neg	7.8534	Neg	18.6999	Neg	1	90-2436	CDC	Lyme	EarlyNeurologicalConvalescent	Pos	1.93	1	1	1	1	1	0	0	0	1	0	1	0	0	0	1	1
90-2668								90-2668	Lyme	EarlyNeurologicalConvalescent	140.32	1	146.85	1	23.5758	1	64.7339	1	27.3083	1	1	90-2668	CDC	Lyme	EarlyNeurologicalConvalescent	Pos	4.41	1	0	0	0	1	1	1	0	0	1	1	1	1	0	1	1
91-0533								91-0533	Lyme	EarlyNeurologicalConvalescent	169.795	1	176.584	1	28.9721	1	2.97194	Neg	20.2461	1	1	91-0533	CDC	Lyme	EarlyNeurologicalConvalescent	Pos	4.33	1	1	1	1	0	1	1	1	1	1	1	1	1	0	1	1
91-0865								91-0865	Lyme	EarlyNeurologicalConvalescent	335.345	1	338.396	1	116.141	1	62.5551	1	30.7197	1	1	91-0865	CDC	Lyme	EarlyNeurologicalConvalescent	Pos	5.98	1	1	1	1	1	1	1	1	1	1	1	1	1	0	1	1
92-0057								92-0057	Lyme	EarlyNeurologicalConvalescent	184.636	1	191.392	1	36.5384	1	-0.861993	Neg	20.4916	1	1	92-0057	CDC	Lyme	EarlyNeurologicalConvalescent	Pos	5.82	1	1	0	1	1	1	1	1	1	0	1	1	1	0	1	1
94-0357								94-0357	Lyme	EarlyNeurologicalConvalescent	12.7157	Neg	12.6136	Neg	11.8849	1	3.8737	Neg	20.5963	1	1	94-0357	CDC	Lyme	EarlyNeurologicalConvalescent	Pos	1.24	1	0	0	1	1	1	1	0	0	0	1	0	1	0	0	1
358								358	NoLyme	HealthyEndemic	7.7481	Neg	8.43603	Neg	-1.35796	Neg	10.4432	Neg	3.7726	Neg	Neg	358	CDC	NoLyme	HealthyEndemic	Neg	0.27	#NULL!	#NULL!	#NULL!	#NULL!	#NULL!	#NULL!	#NULL!	#NULL!	#NULL!	#NULL!	#NULL!	#NULL!	#NULL!	#NULL!	#NULL!	0
359								359	NoLyme	HealthyEndemic	7.71294	Neg	8.37336	Neg	-0.616538	Neg	11.575	Neg	4.07863	Neg	Neg	359	CDC	NoLyme	HealthyEndemic	Neg	0.21	#NULL!	#NULL!	#NULL!	#NULL!	#NULL!	#NULL!	#NULL!	#NULL!	#NULL!	#NULL!	#NULL!	#NULL!	#NULL!	#NULL!	#NULL!	0
360								360	NoLyme	HealthyEndemic	5.99144	Neg	6.61864	Neg	-1.38762	Neg	11.399	Neg	3.37915	Neg	Neg	360	CDC	NoLyme	HealthyEndemic	Neg	0.15	#NULL!	#NULL!	#NULL!	#NULL!	#NULL!	#NULL!	#NULL!	#NULL!	#NULL!	#NULL!	#NULL!	#NULL!	#NULL!	#NULL!	#NULL!	0
361								361	NoLyme	HealthyEndemic	10.7155	Neg	11.4441	Neg	-1.5359	Neg	8.12911	Neg	4.60323	Neg	Neg	361	CDC	NoLyme	HealthyEndemic	Neg	0.11	#NULL!	#NULL!	#NULL!	#NULL!	#NULL!	#NULL!	#NULL!	#NULL!	#NULL!	#NULL!	#NULL!	#NULL!	#NULL!	#NULL!	#NULL!	0
362								362	NoLyme	HealthyEndemic	6.70773	Neg	7.496	Neg	-1.62487	Neg	7.19845	Neg	3.72889	Neg	Neg	362	CDC	NoLyme	HealthyEndemic	Neg	0.24	#NULL!	#NULL!	#NULL!	#NULL!	#NULL!	#NULL!	#NULL!	#NULL!	#NULL!	#NULL!	#NULL!	#NULL!	#NULL!	#NULL!	#NULL!	0
363								363	NoLyme	HealthyEndemic	6.21421	Neg	6.99465	Neg	-1.89178	Neg	8.33033	Neg	2.85454	Neg	Neg	363	CDC	NoLyme	HealthyEndemic	Neg	0.13	#NULL!	#NULL!	#NULL!	#NULL!	#NULL!	#NULL!	#NULL!	#NULL!	#NULL!	#NULL!	#NULL!	#NULL!	#NULL!	#NULL!	#NULL!	0
364								364	NoLyme	HealthyEndemic	7.05949	Neg	7.684	Neg	-1.65453	Neg	5.94081	Neg	3.26986	Neg	Neg	364	CDC	NoLyme	HealthyEndemic	Neg	0.04	#NULL!	#NULL!	#NULL!	#NULL!	#NULL!	#NULL!	#NULL!	#NULL!	#NULL!	#NULL!	#NULL!	#NULL!	#NULL!	#NULL!	#NULL!	0
365								365	NoLyme	HealthyEndemic	8.80262	Neg	9.37606	Neg	-0.497911	Neg	7.80212	Neg	3.22614	Neg	Neg	365	CDC	NoLyme	HealthyEndemic	Neg	0.07	#NULL!	#NULL!	#NULL!	#NULL!	#NULL!	#NULL!	#NULL!	#NULL!	#NULL!	#NULL!	#NULL!	#NULL!	#NULL!	#NULL!	#NULL!	0
366								366	NoLyme	HealthyEndemic	21.7129	Neg	22.1605	Neg	0.540079	Neg	23.4975	Neg	3.26986	Neg	Neg	366	CDC	NoLyme	HealthyEndemic	Neg	0.74	#NULL!	#NULL!	#NULL!	#NULL!	#NULL!	#NULL!	#NULL!	#NULL!	#NULL!	#NULL!	#NULL!	#NULL!	#NULL!	#NULL!	#NULL!	0
367								367	NoLyme	HealthyEndemic	7.78006	Neg	8.4987	Neg	-0.735166	Neg	8.95915	Neg	4.62509	Neg	Neg	367	CDC	NoLyme	HealthyEndemic	Neg	0.07	#NULL!	#NULL!	#NULL!	#NULL!	#NULL!	#NULL!	#NULL!	#NULL!	#NULL!	#NULL!	#NULL!	#NULL!	#NULL!	#NULL!	#NULL!	0
368								368	NoLyme	HealthyEndemic	5.90742	Neg	6.77531	Neg	-1.59521	Neg	9.91496	Neg	3.18242	Neg	Neg	368	CDC	NoLyme	HealthyEndemic	Equiv	0.93	0	0	0	0	0	0	0	0	0	0	0	0	0	0	0	0
369								369	NoLyme	HealthyEndemic	8.26509	Neg	8.90604	Neg	-1.47659	Neg	6.34326	Neg	2.43922	Neg	Neg	369	CDC	NoLyme	HealthyEndemic	Neg	0.08	#NULL!	#NULL!	#NULL!	#NULL!	#NULL!	#NULL!	#NULL!	#NULL!	#NULL!	#NULL!	#NULL!	#NULL!	#NULL!	#NULL!	#NULL!	0
370								370	NoLyme	HealthyEndemic	5.89626	Neg	6.64997	Neg	-1.71384	Neg	5.4126	Neg	1.71789	Neg	Neg	370	CDC	NoLyme	HealthyEndemic	Neg	0.03	#NULL!	#NULL!	#NULL!	#NULL!	#NULL!	#NULL!	#NULL!	#NULL!	#NULL!	#NULL!	#NULL!	#NULL!	#NULL!	#NULL!	#NULL!	0
371								371	NoLyme	HealthyEndemic	54.3546	1	55.5942	1	-0.735166	Neg	15.1468	Neg	14.3522	Neg	Neg	371	CDC	NoLyme	HealthyEndemic	Equiv	0.77	0	0	0	0	1	0	0	0	0	0	0	0	0	0	0	0
1041								1041	NoLyme	HealthyNonendemic	11.7039	Neg	11.6579	Neg	8.97876	Neg	10.3209	Neg	2.36364	Neg	Neg	1041	CDC	NoLyme	HealthyNonendemic	Neg	0.61	#NULL!	#NULL!	#NULL!	#NULL!	#NULL!	#NULL!	#NULL!	#NULL!	#NULL!	#NULL!	#NULL!	#NULL!	#NULL!	#NULL!	#NULL!	0
1043								1043	NoLyme	HealthyNonendemic	9.16004	Neg	8.87396	Neg	5.96244	Neg	4.31753	Neg	-0.055817	Neg	Neg	1043	CDC	NoLyme	HealthyNonendemic	Neg	0.05	#NULL!	#NULL!	#NULL!	#NULL!	#NULL!	#NULL!	#NULL!	#NULL!	#NULL!	#NULL!	#NULL!	#NULL!	#NULL!	#NULL!	#NULL!	0
1044								1044	NoLyme	HealthyNonendemic	11.8192	Neg	11.6671	Neg	5.9925	Neg	5.32198	Neg	1.36794	Neg	Neg	1044	CDC	NoLyme	HealthyNonendemic	Neg	0.33	#NULL!	#NULL!	#NULL!	#NULL!	#NULL!	#NULL!	#NULL!	#NULL!	#NULL!	#NULL!	#NULL!	#NULL!	#NULL!	#NULL!	#NULL!	0
1047								1047	NoLyme	HealthyNonendemic	10.2174	Neg	10.0217	Neg	6.36829	Neg	40.2441	Neg	3.21045	Neg	Neg	1047	CDC	NoLyme	HealthyNonendemic	Neg	0.32	#NULL!	#NULL!	#NULL!	#NULL!	#NULL!	#NULL!	#NULL!	#NULL!	#NULL!	#NULL!	#NULL!	#NULL!	#NULL!	#NULL!	#NULL!	0
1050								1050	NoLyme	HealthyNonendemic	9.93787	Neg	9.64831	Neg	6.29313	Neg	8.91931	Neg	1.36794	Neg	Neg	1050	CDC	NoLyme	HealthyNonendemic	Neg	0.19	#NULL!	#NULL!	#NULL!	#NULL!	#NULL!	#NULL!	#NULL!	#NULL!	#NULL!	#NULL!	#NULL!	#NULL!	#NULL!	#NULL!	#NULL!	0
1051								1051	NoLyme	HealthyNonendemic	9.4079	Neg	9.20582	Neg	6.20294	Neg	2.89261	Neg	0.921272	Neg	Neg	1051	CDC	NoLyme	HealthyNonendemic	Neg	0.11	#NULL!	#NULL!	#NULL!	#NULL!	#NULL!	#NULL!	#NULL!	#NULL!	#NULL!	#NULL!	#NULL!	#NULL!	#NULL!	#NULL!	#NULL!	0
1052								1052	NoLyme	HealthyNonendemic	12.0252	Neg	11.8607	Neg	5.60168	Neg	3.85034	Neg	0.809604	Neg	Neg	1052	CDC	NoLyme	HealthyNonendemic	Neg	0.11	#NULL!	#NULL!	#NULL!	#NULL!	#NULL!	#NULL!	#NULL!	#NULL!	#NULL!	#NULL!	#NULL!	#NULL!	#NULL!	#NULL!	#NULL!	0
1053								1053	NoLyme	HealthyNonendemic	9.8129	Neg	9.70362	Neg	6.02256	Neg	3.49996	Neg	0.949188	Neg	Neg	1053	CDC	NoLyme	HealthyNonendemic	Neg	0.29	#NULL!	#NULL!	#NULL!	#NULL!	#NULL!	#NULL!	#NULL!	#NULL!	#NULL!	#NULL!	#NULL!	#NULL!	#NULL!	#NULL!	#NULL!	0
1054								1054	NoLyme	HealthyNonendemic	12.0216	Neg	11.6395	Neg	6.59376	Neg	6.02276	Neg	1.42377	Neg	Neg	1054	CDC	NoLyme	HealthyNonendemic	Neg	0.53	#NULL!	#NULL!	#NULL!	#NULL!	#NULL!	#NULL!	#NULL!	#NULL!	#NULL!	#NULL!	#NULL!	#NULL!	#NULL!	#NULL!	#NULL!	0
1055								1055	NoLyme	HealthyNonendemic	10.1467	Neg	10.0078	Neg	6.83426	Neg	4.76136	Neg	1.31211	Neg	Neg	1055	CDC	NoLyme	HealthyNonendemic	Neg	0.15	#NULL!	#NULL!	#NULL!	#NULL!	#NULL!	#NULL!	#NULL!	#NULL!	#NULL!	#NULL!	#NULL!	#NULL!	#NULL!	#NULL!	#NULL!	0
1056								1056	NoLyme	HealthyNonendemic	12.3617	Neg	12.1373	Neg	6.98458	Neg	5.46214	Neg	0.865438	Neg	Neg	1056	CDC	NoLyme	HealthyNonendemic	Neg	0.41	#NULL!	#NULL!	#NULL!	#NULL!	#NULL!	#NULL!	#NULL!	#NULL!	#NULL!	#NULL!	#NULL!	#NULL!	#NULL!	#NULL!	#NULL!	0
1057								1057	NoLyme	HealthyNonendemic	9.67911	Neg	9.64831	Neg	6.233	Neg	6.04612	Neg	1.17252	Neg	Neg	1057	CDC	NoLyme	HealthyNonendemic	Neg	0.25	#NULL!	#NULL!	#NULL!	#NULL!	#NULL!	#NULL!	#NULL!	#NULL!	#NULL!	#NULL!	#NULL!	#NULL!	#NULL!	#NULL!	#NULL!	0
1058								1058	NoLyme	HealthyNonendemic	10.8612	Neg	10.8651	Neg	6.29313	Neg	5.43878	Neg	1.70294	Neg	Neg	1058	CDC	NoLyme	HealthyNonendemic	Neg	0.46	#NULL!	#NULL!	#NULL!	#NULL!	#NULL!	#NULL!	#NULL!	#NULL!	#NULL!	#NULL!	#NULL!	#NULL!	#NULL!	#NULL!	#NULL!	0
1059								1059	NoLyme	HealthyNonendemic	10.357	Neg	10.3397	Neg	6.89439	Neg	4.38761	Neg	0.809604	Neg	Neg	1059	CDC	NoLyme	HealthyNonendemic	Neg	0.27	#NULL!	#NULL!	#NULL!	#NULL!	#NULL!	#NULL!	#NULL!	#NULL!	#NULL!	#NULL!	#NULL!	#NULL!	#NULL!	#NULL!	#NULL!	0
1062								1062	NoLyme	HealthyNonendemic	17.3113	Neg	17.0599	Neg	7.13489	Neg	4.29417	Neg	1.36794	Neg	Neg	1062	CDC	NoLyme	HealthyNonendemic	Neg	0.26	#NULL!	#NULL!	#NULL!	#NULL!	#NULL!	#NULL!	#NULL!	#NULL!	#NULL!	#NULL!	#NULL!	#NULL!	#NULL!	#NULL!	#NULL!	0
1063								1063	NoLyme	HealthyNonendemic	9.02821	Neg	9.01224	Neg	5.90231	Neg	2.91597	Neg	0.251268	Neg	Neg	1063	CDC	NoLyme	HealthyNonendemic	Neg	0.07	#NULL!	#NULL!	#NULL!	#NULL!	#NULL!	#NULL!	#NULL!	#NULL!	#NULL!	#NULL!	#NULL!	#NULL!	#NULL!	#NULL!	#NULL!	0
1064								1064	NoLyme	HealthyNonendemic	9.68957	Neg	9.67596	Neg	6.02256	Neg	5.50885	Neg	0.781688	Neg	Neg	1064	CDC	NoLyme	HealthyNonendemic	Neg	0.54	#NULL!	#NULL!	#NULL!	#NULL!	#NULL!	#NULL!	#NULL!	#NULL!	#NULL!	#NULL!	#NULL!	#NULL!	#NULL!	#NULL!	#NULL!	0
1066								1066	NoLyme	HealthyNonendemic	13.6844	Neg	13.4647	Neg	5.90231	Neg	4.31753	Neg	2.84753	Neg	Neg	1066	CDC	NoLyme	HealthyNonendemic	Neg	0.22	#NULL!	#NULL!	#NULL!	#NULL!	#NULL!	#NULL!	#NULL!	#NULL!	#NULL!	#NULL!	#NULL!	#NULL!	#NULL!	#NULL!	#NULL!	0
1068								1068	NoLyme	HealthyNonendemic	10.7354	Neg	10.5886	Neg	5.9925	Neg	4.50441	Neg	1.25627	Neg	Neg	1068	CDC	NoLyme	HealthyNonendemic	Neg	0.04	#NULL!	#NULL!	#NULL!	#NULL!	#NULL!	#NULL!	#NULL!	#NULL!	#NULL!	#NULL!	#NULL!	#NULL!	#NULL!	#NULL!	#NULL!	0
1069								1069	NoLyme	HealthyNonendemic	12.2114	Neg	12.1096	Neg	8.30735	Neg	3.49996	Neg	3.15462	Neg	Neg	1069	CDC	NoLyme	HealthyNonendemic	Neg	0.19	#NULL!	#NULL!	#NULL!	#NULL!	#NULL!	#NULL!	#NULL!	#NULL!	#NULL!	#NULL!	#NULL!	#NULL!	#NULL!	#NULL!	#NULL!	0
1073								1073	NoLyme	HealthyNonendemic	10.6158	Neg	10.478	Neg	6.47351	Neg	6.44323	Neg	2.14961	Neg	Neg	1073	CDC	NoLyme	HealthyNonendemic	Neg	0.68	#NULL!	#NULL!	#NULL!	#NULL!	#NULL!	#NULL!	#NULL!	#NULL!	#NULL!	#NULL!	#NULL!	#NULL!	#NULL!	#NULL!	#NULL!	0
1074								1074	NoLyme	HealthyNonendemic	10.7161	Neg	10.5609	Neg	7.19502	Neg	3.66347	Neg	1.89836	Neg	Neg	1074	CDC	NoLyme	HealthyNonendemic	Neg	0.13	#NULL!	#NULL!	#NULL!	#NULL!	#NULL!	#NULL!	#NULL!	#NULL!	#NULL!	#NULL!	#NULL!	#NULL!	#NULL!	#NULL!	#NULL!	0
1077								1077	NoLyme	HealthyNonendemic	12.1437	Neg	12.215	Neg	5.8195	Neg	8.68404	Neg	-4.08789	Neg	Neg	1077	CDC	NoLyme	HealthyNonendemic	Neg	0.13	#NULL!	#NULL!	#NULL!	#NULL!	#NULL!	#NULL!	#NULL!	#NULL!	#NULL!	#NULL!	#NULL!	#NULL!	#NULL!	#NULL!	#NULL!	0
1082								1082	NoLyme	HealthyNonendemic	16.3843	Neg	16.2303	Neg	7.16496	Neg	16.8148	Neg	5.2763	Neg	Neg	1082	CDC	NoLyme	HealthyNonendemic	Neg	0.34	#NULL!	#NULL!	#NULL!	#NULL!	#NULL!	#NULL!	#NULL!	#NULL!	#NULL!	#NULL!	#NULL!	#NULL!	#NULL!	#NULL!	#NULL!	0
1083								1083	NoLyme	HealthyNonendemic	11.4295	Neg	11.4459	Neg	8.30735	Neg	3.42988	Neg	1.11669	Neg	Neg	1083	CDC	NoLyme	HealthyNonendemic	Neg	0.06	#NULL!	#NULL!	#NULL!	#NULL!	#NULL!	#NULL!	#NULL!	#NULL!	#NULL!	#NULL!	#NULL!	#NULL!	#NULL!	#NULL!	#NULL!	0
1103								1103	NoLyme	HealthyNonendemic	6.83326	Neg	7.01819	Neg	1.70687	Neg	3.13116	Neg	1.26862	Neg	Neg	1103	CDC	NoLyme	HealthyNonendemic	Neg	0.04	#NULL!	#NULL!	#NULL!	#NULL!	#NULL!	#NULL!	#NULL!	#NULL!	#NULL!	#NULL!	#NULL!	#NULL!	#NULL!	#NULL!	#NULL!	0
1109								1109	NoLyme	HealthyNonendemic	10.9203	Neg	10.9042	Neg	4.23205	Neg	5.0242	Neg	-1.65646	Neg	Neg	1109	CDC	NoLyme	HealthyNonendemic	Neg	0.62	#NULL!	#NULL!	#NULL!	#NULL!	#NULL!	#NULL!	#NULL!	#NULL!	#NULL!	#NULL!	#NULL!	#NULL!	#NULL!	#NULL!	#NULL!	0
1113								1113	NoLyme	HealthyNonendemic	12.2969	Neg	12.5033	Neg	2.91467	Neg	5.91696	Neg	2.58227	Neg	Neg	1113	CDC	NoLyme	HealthyNonendemic	Neg	0.28	#NULL!	#NULL!	#NULL!	#NULL!	#NULL!	#NULL!	#NULL!	#NULL!	#NULL!	#NULL!	#NULL!	#NULL!	#NULL!	#NULL!	#NULL!	0
1114								1114	NoLyme	HealthyNonendemic	17.0223	Neg	16.9493	Neg	6.95452	Neg	4.20073	Neg	2.09378	Neg	Neg	1114	CDC	NoLyme	HealthyNonendemic	Neg	0.31	#NULL!	#NULL!	#NULL!	#NULL!	#NULL!	#NULL!	#NULL!	#NULL!	#NULL!	#NULL!	#NULL!	#NULL!	#NULL!	#NULL!	#NULL!	0
1117								1117	NoLyme	HealthyNonendemic	16.9868	Neg	17.0366	Neg	4.77876	Neg	5.37325	Neg	-0.589085	Neg	Neg	1117	CDC	NoLyme	HealthyNonendemic	Neg	0.23	#NULL!	#NULL!	#NULL!	#NULL!	#NULL!	#NULL!	#NULL!	#NULL!	#NULL!	#NULL!	#NULL!	#NULL!	#NULL!	#NULL!	#NULL!	0
1118								1118	NoLyme	HealthyNonendemic	9.7317	Neg	9.57917	Neg	6.35325	Neg	6.5717	Neg	1.39586	Neg	Neg	1118	CDC	NoLyme	HealthyNonendemic	Neg	0.27	#NULL!	#NULL!	#NULL!	#NULL!	#NULL!	#NULL!	#NULL!	#NULL!	#NULL!	#NULL!	#NULL!	#NULL!	#NULL!	#NULL!	#NULL!	0
1119								1119	NoLyme	HealthyNonendemic	11.2385	Neg	11.1417	Neg	6.8042	Neg	14.3153	Neg	3.90837	Neg	Neg	1119	CDC	NoLyme	HealthyNonendemic	Neg	0.11	#NULL!	#NULL!	#NULL!	#NULL!	#NULL!	#NULL!	#NULL!	#NULL!	#NULL!	#NULL!	#NULL!	#NULL!	#NULL!	#NULL!	#NULL!	0
1120								1120	NoLyme	HealthyNonendemic	7.83565	Neg	7.76775	Neg	6.20294	Neg	3.59339	Neg	1.28419	Neg	Neg	1120	CDC	NoLyme	HealthyNonendemic	Neg	0.24	#NULL!	#NULL!	#NULL!	#NULL!	#NULL!	#NULL!	#NULL!	#NULL!	#NULL!	#NULL!	#NULL!	#NULL!	#NULL!	#NULL!	#NULL!	0
1126								1126	NoLyme	HealthyNonendemic	11.1804	Neg	10.8926	Neg	2.46184	Neg	7.23081	Neg	-3.96952	Neg	Neg	1126	CDC	NoLyme	HealthyNonendemic	Neg	0.1	#NULL!	#NULL!	#NULL!	#NULL!	#NULL!	#NULL!	#NULL!	#NULL!	#NULL!	#NULL!	#NULL!	#NULL!	#NULL!	#NULL!	#NULL!	0
1127								1127	NoLyme	HealthyNonendemic	11.1393	Neg	11.0864	Neg	7.28521	Neg	3.4766	Neg	0.697937	Neg	Neg	1127	CDC	NoLyme	HealthyNonendemic	Neg	0.5	#NULL!	#NULL!	#NULL!	#NULL!	#NULL!	#NULL!	#NULL!	#NULL!	#NULL!	#NULL!	#NULL!	#NULL!	#NULL!	#NULL!	#NULL!	0
1128								1128	NoLyme	HealthyNonendemic	14.9874	Neg	15.0134	Neg	8.27729	Neg	9.36314	Neg	3.93629	Neg	Neg	1128	CDC	NoLyme	HealthyNonendemic	Neg	0.51	#NULL!	#NULL!	#NULL!	#NULL!	#NULL!	#NULL!	#NULL!	#NULL!	#NULL!	#NULL!	#NULL!	#NULL!	#NULL!	#NULL!	#NULL!	0
1132								1132	NoLyme	HealthyNonendemic	8.75598	Neg	9.03868	Neg	0.405283	Neg	6.84694	Neg	2.32721	Neg	Neg	1132	CDC	NoLyme	HealthyNonendemic	Neg	0.31	#NULL!	#NULL!	#NULL!	#NULL!	#NULL!	#NULL!	#NULL!	#NULL!	#NULL!	#NULL!	#NULL!	#NULL!	#NULL!	#NULL!	#NULL!	0
1134								1134	NoLyme	HealthyNonendemic	7.71516	Neg	8.05418	Neg	-0.142656	Neg	9.36422	Neg	2.92095	Neg	Neg	1134	CDC	NoLyme	HealthyNonendemic	Neg	0.36	#NULL!	#NULL!	#NULL!	#NULL!	#NULL!	#NULL!	#NULL!	#NULL!	#NULL!	#NULL!	#NULL!	#NULL!	#NULL!	#NULL!	#NULL!	0
1135								1135	NoLyme	HealthyNonendemic	9.34705	Neg	9.37175	Neg	2.69746	Neg	8.16503	Neg	-4.16681	Neg	Neg	1135	CDC	NoLyme	HealthyNonendemic	Equiv	0.85	0	0	0	0	0	0	0	0	0	0	0	0	0	0	0	0
1136								1136	NoLyme	HealthyNonendemic	10.1234	Neg	9.96089	Neg	2.6091	Neg	7.07511	Neg	-4.18654	Neg	Neg	1136	CDC	NoLyme	HealthyNonendemic	Neg	0.22	#NULL!	#NULL!	#NULL!	#NULL!	#NULL!	#NULL!	#NULL!	#NULL!	#NULL!	#NULL!	#NULL!	#NULL!	#NULL!	#NULL!	#NULL!	0
1137								1137	NoLyme	HealthyNonendemic	10.8691	Neg	10.8024	Neg	2.72691	Neg	7.93148	Neg	-3.49604	Neg	Neg	1137	CDC	NoLyme	HealthyNonendemic	Neg	0.09	#NULL!	#NULL!	#NULL!	#NULL!	#NULL!	#NULL!	#NULL!	#NULL!	#NULL!	#NULL!	#NULL!	#NULL!	#NULL!	#NULL!	#NULL!	0
1138								1138	NoLyme	HealthyNonendemic	9.39449	Neg	9.41991	Neg	2.34402	Neg	5.69973	Neg	-5.05459	Neg	Neg	1138	CDC	NoLyme	HealthyNonendemic	Neg	0.45	#NULL!	#NULL!	#NULL!	#NULL!	#NULL!	#NULL!	#NULL!	#NULL!	#NULL!	#NULL!	#NULL!	#NULL!	#NULL!	#NULL!	#NULL!	0
1139								1139	NoLyme	HealthyNonendemic	9.98611	Neg	10.2614	Neg	2.34402	Neg	6.63395	Neg	-3.77224	Neg	Neg	1139	CDC	NoLyme	HealthyNonendemic	Neg	0.38	#NULL!	#NULL!	#NULL!	#NULL!	#NULL!	#NULL!	#NULL!	#NULL!	#NULL!	#NULL!	#NULL!	#NULL!	#NULL!	#NULL!	#NULL!	0
1141								1141	NoLyme	HealthyNonendemic	11.382	Neg	11.4937	Neg	2.93309	Neg	11.6165	Neg	-2.58854	Neg	Neg	1141	CDC	NoLyme	HealthyNonendemic	Neg	0.11	#NULL!	#NULL!	#NULL!	#NULL!	#NULL!	#NULL!	#NULL!	#NULL!	#NULL!	#NULL!	#NULL!	#NULL!	#NULL!	#NULL!	#NULL!	0
1142								1142	NoLyme	HealthyNonendemic	11.6127	Neg	11.5237	Neg	3.0509	Neg	6.73775	Neg	-3.9498	Neg	Neg	1142	CDC	NoLyme	HealthyNonendemic	Neg	0.08	#NULL!	#NULL!	#NULL!	#NULL!	#NULL!	#NULL!	#NULL!	#NULL!	#NULL!	#NULL!	#NULL!	#NULL!	#NULL!	#NULL!	#NULL!	0
3219								3219	NoLyme	HealthyNonendemic	11.2525	Neg	11.4035	Neg	2.5502	Neg	16.9363	Neg	-0.832712	Neg	Neg	3219	CDC	NoLyme	HealthyNonendemic	Neg	0.57	#NULL!	#NULL!	#NULL!	#NULL!	#NULL!	#NULL!	#NULL!	#NULL!	#NULL!	#NULL!	#NULL!	#NULL!	#NULL!	#NULL!	#NULL!	0
3220								3220	NoLyme	HealthyNonendemic	9.54103	Neg	9.26964	Neg	2.31457	Neg	10.3708	Neg	-2.58854	Neg	Neg	3220	CDC	NoLyme	HealthyNonendemic	Neg	0.64	#NULL!	#NULL!	#NULL!	#NULL!	#NULL!	#NULL!	#NULL!	#NULL!	#NULL!	#NULL!	#NULL!	#NULL!	#NULL!	#NULL!	#NULL!	0
3223								3223	NoLyme	HealthyNonendemic	21.6999	Neg	21.8124	Neg	4.22903	Neg	8.18233	Neg	-1.635	Neg	Neg	3223	CDC	NoLyme	HealthyNonendemic	Neg	0.33	#NULL!	#NULL!	#NULL!	#NULL!	#NULL!	#NULL!	#NULL!	#NULL!	#NULL!	#NULL!	#NULL!	#NULL!	#NULL!	#NULL!	#NULL!	0
3226								3226	NoLyme	HealthyNonendemic	9.91661	Neg	9.96089	Neg	2.57965	Neg	8.94355	Neg	-1.10891	Neg	Neg	3226	CDC	NoLyme	HealthyNonendemic	Neg	0.21	#NULL!	#NULL!	#NULL!	#NULL!	#NULL!	#NULL!	#NULL!	#NULL!	#NULL!	#NULL!	#NULL!	#NULL!	#NULL!	#NULL!	#NULL!	0
3229								3229	NoLyme	HealthyNonendemic	8.59727	Neg	9.05329	Neg	0.743384	Neg	13.2924	Neg	1.71173	Neg	Neg	3229	CDC	NoLyme	HealthyNonendemic	Neg	0.45	#NULL!	#NULL!	#NULL!	#NULL!	#NULL!	#NULL!	#NULL!	#NULL!	#NULL!	#NULL!	#NULL!	#NULL!	#NULL!	#NULL!	#NULL!	0
3231								3231	NoLyme	HealthyNonendemic	11.2296	Neg	11.3735	Neg	2.49129	Neg	10.1632	Neg	3.05378	Neg	Neg	3231	CDC	NoLyme	HealthyNonendemic	Neg	0.37	#NULL!	#NULL!	#NULL!	#NULL!	#NULL!	#NULL!	#NULL!	#NULL!	#NULL!	#NULL!	#NULL!	#NULL!	#NULL!	#NULL!	#NULL!	0
3232								3232	NoLyme	HealthyNonendemic	11.4294	Neg	11.7341	Neg	3.69887	Neg	7.64602	Neg	-2.29261	Neg	Neg	3232	CDC	NoLyme	HealthyNonendemic	Neg	0.27	#NULL!	#NULL!	#NULL!	#NULL!	#NULL!	#NULL!	#NULL!	#NULL!	#NULL!	#NULL!	#NULL!	#NULL!	#NULL!	#NULL!	#NULL!	0
3233								3233	NoLyme	HealthyNonendemic	16.1085	Neg	16.1822	Neg	2.90363	Neg	12.8361	Neg	-1.34565	Neg	Neg	3233	CDC	NoLyme	HealthyNonendemic	Neg	0.27	#NULL!	#NULL!	#NULL!	#NULL!	#NULL!	#NULL!	#NULL!	#NULL!	#NULL!	#NULL!	#NULL!	#NULL!	#NULL!	#NULL!	#NULL!	0
3235								3235	NoLyme	HealthyNonendemic	12.8483	Neg	12.9964	Neg	2.69746	Neg	9.38471	Neg	-2.96338	Neg	Neg	3235	CDC	NoLyme	HealthyNonendemic	Neg	0.07	#NULL!	#NULL!	#NULL!	#NULL!	#NULL!	#NULL!	#NULL!	#NULL!	#NULL!	#NULL!	#NULL!	#NULL!	#NULL!	#NULL!	#NULL!	0
3237								3237	NoLyme	HealthyNonendemic	10.2129	Neg	10.1713	Neg	2.69746	Neg	16.1059	Neg	-4.34436	Neg	Neg	3237	CDC	NoLyme	HealthyNonendemic	Neg	0.04	#NULL!	#NULL!	#NULL!	#NULL!	#NULL!	#NULL!	#NULL!	#NULL!	#NULL!	#NULL!	#NULL!	#NULL!	#NULL!	#NULL!	#NULL!	0
3238								3238	NoLyme	HealthyNonendemic	10.971	Neg	11.0128	Neg	2.19676	Neg	15.7166	Neg	-0.221132	Neg	Neg	3238	CDC	NoLyme	HealthyNonendemic	Neg	0.1	#NULL!	#NULL!	#NULL!	#NULL!	#NULL!	#NULL!	#NULL!	#NULL!	#NULL!	#NULL!	#NULL!	#NULL!	#NULL!	#NULL!	#NULL!	0
3240								3240	NoLyme	HealthyNonendemic	12.4771	Neg	12.6959	Neg	2.69746	Neg	12.0057	Neg	-2.84501	Neg	Neg	3240	CDC	NoLyme	HealthyNonendemic	Neg	0.07	#NULL!	#NULL!	#NULL!	#NULL!	#NULL!	#NULL!	#NULL!	#NULL!	#NULL!	#NULL!	#NULL!	#NULL!	#NULL!	#NULL!	#NULL!	0
3241								3241	NoLyme	HealthyNonendemic	12.9116	Neg	12.8461	Neg	3.08035	Neg	16.2616	Neg	6.46679	Neg	Neg	3241	CDC	NoLyme	HealthyNonendemic	Neg	0.32	#NULL!	#NULL!	#NULL!	#NULL!	#NULL!	#NULL!	#NULL!	#NULL!	#NULL!	#NULL!	#NULL!	#NULL!	#NULL!	#NULL!	#NULL!	0
3242								3242	NoLyme	HealthyNonendemic	10.8828	Neg	10.8625	Neg	3.31598	Neg	7.93148	Neg	-2.64772	Neg	Neg	3242	CDC	NoLyme	HealthyNonendemic	Neg	0.38	#NULL!	#NULL!	#NULL!	#NULL!	#NULL!	#NULL!	#NULL!	#NULL!	#NULL!	#NULL!	#NULL!	#NULL!	#NULL!	#NULL!	#NULL!	0
3245								3245	NoLyme	HealthyNonendemic	10.3337	Neg	10.7123	Neg	1.63715	Neg	6.8675	Neg	-4.56138	Neg	Neg	3245	CDC	NoLyme	HealthyNonendemic	Equiv	0.78	0	0	0	0	0	0	0	0	0	0	0	0	0	0	0	0
3246								3246	NoLyme	HealthyNonendemic	10.1522	Neg	10.2915	Neg	4.49411	Neg	9.04735	Neg	-2.56881	Neg	Neg	3246	CDC	NoLyme	HealthyNonendemic	Neg	0.31	#NULL!	#NULL!	#NULL!	#NULL!	#NULL!	#NULL!	#NULL!	#NULL!	#NULL!	#NULL!	#NULL!	#NULL!	#NULL!	#NULL!	#NULL!	0
3247								3247	NoLyme	HealthyNonendemic	9.82982	Neg	9.93084	Neg	2.34402	Neg	7.12701	Neg	-3.33822	Neg	Neg	3247	CDC	NoLyme	HealthyNonendemic	Neg	0.11	#NULL!	#NULL!	#NULL!	#NULL!	#NULL!	#NULL!	#NULL!	#NULL!	#NULL!	#NULL!	#NULL!	#NULL!	#NULL!	#NULL!	#NULL!	0
3248								3248	NoLyme	HealthyNonendemic	10.7651	Neg	11.0429	Neg	2.75637	Neg	7.67197	Neg	-2.70691	Neg	Neg	3248	CDC	NoLyme	HealthyNonendemic	Neg	0.22	#NULL!	#NULL!	#NULL!	#NULL!	#NULL!	#NULL!	#NULL!	#NULL!	#NULL!	#NULL!	#NULL!	#NULL!	#NULL!	#NULL!	#NULL!	0
3249								3249	NoLyme	HealthyNonendemic	12.7721	Neg	13.5374	Neg	5.25989	Neg	9.33281	Neg	-1.48375	Neg	Neg	3249	CDC	NoLyme	HealthyNonendemic	Neg	0.12	#NULL!	#NULL!	#NULL!	#NULL!	#NULL!	#NULL!	#NULL!	#NULL!	#NULL!	#NULL!	#NULL!	#NULL!	#NULL!	#NULL!	#NULL!	0
3250								3250	NoLyme	HealthyNonendemic	10.3488	Neg	10.6521	Neg	2.57965	Neg	12.3431	Neg	-0.990539	Neg	Neg	3250	CDC	NoLyme	HealthyNonendemic	Pos	1.03	0	0	0	0	0	0	0	0	0	0	0	0	0	0	0	0
3251								3251	NoLyme	HealthyNonendemic	13.4762	Neg	13.6275	Neg	2.87418	Neg	9.09925	Neg	-0.674885	Neg	Neg	3251	CDC	NoLyme	HealthyNonendemic	Neg	0.12	#NULL!	#NULL!	#NULL!	#NULL!	#NULL!	#NULL!	#NULL!	#NULL!	#NULL!	#NULL!	#NULL!	#NULL!	#NULL!	#NULL!	#NULL!	0
3254								3254	NoLyme	HealthyNonendemic	9.78634	Neg	10.021	Neg	1.93168	Neg	6.40039	Neg	-3.59469	Neg	Neg	3254	CDC	NoLyme	HealthyNonendemic	Neg	0.73	#NULL!	#NULL!	#NULL!	#NULL!	#NULL!	#NULL!	#NULL!	#NULL!	#NULL!	#NULL!	#NULL!	#NULL!	#NULL!	#NULL!	#NULL!	0
3255								3255	NoLyme	HealthyNonendemic	9.47821	Neg	9.66035	Neg	2.46184	Neg	7.95743	Neg	-1.77967	Neg	Neg	3255	CDC	NoLyme	HealthyNonendemic	Neg	0.23	#NULL!	#NULL!	#NULL!	#NULL!	#NULL!	#NULL!	#NULL!	#NULL!	#NULL!	#NULL!	#NULL!	#NULL!	#NULL!	#NULL!	#NULL!	0
3256								3256	NoLyme	HealthyNonendemic	12.036	Neg	12.215	Neg	3.0509	Neg	6.19279	Neg	-4.67975	Neg	Neg	3256	CDC	NoLyme	HealthyNonendemic	Neg	0.63	#NULL!	#NULL!	#NULL!	#NULL!	#NULL!	#NULL!	#NULL!	#NULL!	#NULL!	#NULL!	#NULL!	#NULL!	#NULL!	#NULL!	#NULL!	0
3258								3258	NoLyme	HealthyNonendemic	9.73851	Neg	10.2915	Neg	2.49129	Neg	8.39859	Neg	-4.36409	Neg	Neg	3258	CDC	NoLyme	HealthyNonendemic	Neg	0.03	#NULL!	#NULL!	#NULL!	#NULL!	#NULL!	#NULL!	#NULL!	#NULL!	#NULL!	#NULL!	#NULL!	#NULL!	#NULL!	#NULL!	#NULL!	0
3260								3260	NoLyme	HealthyNonendemic	12.3372	Neg	12.3953	Neg	3.78723	Neg	7.10106	Neg	-3.69333	Neg	Neg	3260	CDC	NoLyme	HealthyNonendemic	Neg	0.11	#NULL!	#NULL!	#NULL!	#NULL!	#NULL!	#NULL!	#NULL!	#NULL!	#NULL!	#NULL!	#NULL!	#NULL!	#NULL!	#NULL!	#NULL!	0
3261								3261	NoLyme	HealthyNonendemic	15.3292	Neg	15.6111	Neg	0.836647	Neg	6.16719	Neg	2.39551	Neg	Neg	3261	CDC	NoLyme	HealthyNonendemic	Neg	0.06	#NULL!	#NULL!	#NULL!	#NULL!	#NULL!	#NULL!	#NULL!	#NULL!	#NULL!	#NULL!	#NULL!	#NULL!	#NULL!	#NULL!	#NULL!	0
3262								3262	NoLyme	HealthyNonendemic	10.2784	Neg	10.4418	Neg	-2.27732	Neg	7.62605	Neg	1.95833	Neg	Neg	3262	CDC	NoLyme	HealthyNonendemic	Neg	0.07	#NULL!	#NULL!	#NULL!	#NULL!	#NULL!	#NULL!	#NULL!	#NULL!	#NULL!	#NULL!	#NULL!	#NULL!	#NULL!	#NULL!	#NULL!	0
3263								3263	NoLyme	HealthyNonendemic	5.90934	Neg	6.52463	Neg	-1.44693	Neg	5.96596	Neg	1.89276	Neg	Neg	3263	CDC	NoLyme	HealthyNonendemic	Neg	0.37	#NULL!	#NULL!	#NULL!	#NULL!	#NULL!	#NULL!	#NULL!	#NULL!	#NULL!	#NULL!	#NULL!	#NULL!	#NULL!	#NULL!	#NULL!	0
3271								3271	NoLyme	HealthyNonendemic	10.0035	Neg	10.5668	Neg	-0.853793	Neg	13.3106	Neg	6.48308	Neg	Neg	3271	CDC	NoLyme	HealthyNonendemic	Neg	0.65	#NULL!	#NULL!	#NULL!	#NULL!	#NULL!	#NULL!	#NULL!	#NULL!	#NULL!	#NULL!	#NULL!	#NULL!	#NULL!	#NULL!	#NULL!	0
3272								3272	NoLyme	HealthyNonendemic	6.94033	Neg	7.62133	Neg	-1.65453	Neg	9.38675	Neg	2.43922	Neg	Neg	3272	CDC	NoLyme	HealthyNonendemic	Neg	0.2	#NULL!	#NULL!	#NULL!	#NULL!	#NULL!	#NULL!	#NULL!	#NULL!	#NULL!	#NULL!	#NULL!	#NULL!	#NULL!	#NULL!	#NULL!	0
3273								3273	NoLyme	HealthyNonendemic	6.013	Neg	6.6813	Neg	-0.735166	Neg	5.08561	Neg	1.58674	Neg	Neg	3273	CDC	NoLyme	HealthyNonendemic	Neg	0.01	#NULL!	#NULL!	#NULL!	#NULL!	#NULL!	#NULL!	#NULL!	#NULL!	#NULL!	#NULL!	#NULL!	#NULL!	#NULL!	#NULL!	#NULL!	0
3274								3274	NoLyme	HealthyNonendemic	6.8794	Neg	7.55867	Neg	-0.171685	Neg	5.81505	Neg	2.39551	Neg	Neg	3274	CDC	NoLyme	HealthyNonendemic	Neg	0.23	#NULL!	#NULL!	#NULL!	#NULL!	#NULL!	#NULL!	#NULL!	#NULL!	#NULL!	#NULL!	#NULL!	#NULL!	#NULL!	#NULL!	#NULL!	0
3276								3276	NoLyme	HealthyNonendemic	8.39453	Neg	9.00005	Neg	-1.20968	Neg	8.98431	Neg	2.43922	Neg	Neg	3276	CDC	NoLyme	HealthyNonendemic	Neg	0.21	#NULL!	#NULL!	#NULL!	#NULL!	#NULL!	#NULL!	#NULL!	#NULL!	#NULL!	#NULL!	#NULL!	#NULL!	#NULL!	#NULL!	#NULL!	0
3277								3277	NoLyme	HealthyNonendemic	7.31933	Neg	7.96601	Neg	-0.88345	Neg	6.67024	Neg	3.00755	Neg	Neg	3277	CDC	NoLyme	HealthyNonendemic	Neg	0.34	#NULL!	#NULL!	#NULL!	#NULL!	#NULL!	#NULL!	#NULL!	#NULL!	#NULL!	#NULL!	#NULL!	#NULL!	#NULL!	#NULL!	#NULL!	0
3279								3279	NoLyme	HealthyNonendemic	9.72248	Neg	10.3474	Neg	-0.497911	Neg	5.94081	Neg	2.41737	Neg	Neg	3279	CDC	NoLyme	HealthyNonendemic	Neg	0.03	#NULL!	#NULL!	#NULL!	#NULL!	#NULL!	#NULL!	#NULL!	#NULL!	#NULL!	#NULL!	#NULL!	#NULL!	#NULL!	#NULL!	#NULL!	0
3280								3280	NoLyme	HealthyNonendemic	7.5525	Neg	8.12268	Neg	-1.83247	Neg	18.1148	Neg	8.69081	Neg	Neg	3280	CDC	NoLyme	HealthyNonendemic	Neg	0.33	#NULL!	#NULL!	#NULL!	#NULL!	#NULL!	#NULL!	#NULL!	#NULL!	#NULL!	#NULL!	#NULL!	#NULL!	#NULL!	#NULL!	#NULL!	0
3281								3281	NoLyme	HealthyNonendemic	7.85508	Neg	8.6867	Neg	-0.112372	Neg	8.4561	Neg	3.94747	Neg	Neg	3281	CDC	NoLyme	HealthyNonendemic	Neg	0.29	#NULL!	#NULL!	#NULL!	#NULL!	#NULL!	#NULL!	#NULL!	#NULL!	#NULL!	#NULL!	#NULL!	#NULL!	#NULL!	#NULL!	#NULL!	0
3288								3288	NoLyme	HealthyNonendemic	7.62567	Neg	8.31069	Neg	-1.29865	Neg	12.5812	Neg	7.94761	Neg	Neg	3288	CDC	NoLyme	HealthyNonendemic	Neg	0.31	#NULL!	#NULL!	#NULL!	#NULL!	#NULL!	#NULL!	#NULL!	#NULL!	#NULL!	#NULL!	#NULL!	#NULL!	#NULL!	#NULL!	#NULL!	0
3289								3289	NoLyme	HealthyNonendemic	7.60928	Neg	8.27936	Neg	0.124883	Neg	7.47513	Neg	2.72339	Neg	Neg	3289	CDC	NoLyme	HealthyNonendemic	Neg	0.38	#NULL!	#NULL!	#NULL!	#NULL!	#NULL!	#NULL!	#NULL!	#NULL!	#NULL!	#NULL!	#NULL!	#NULL!	#NULL!	#NULL!	#NULL!	0
3291								3291	NoLyme	HealthyNonendemic	12.4685	Neg	12.9482	Neg	2.97194	Neg	9.99042	Neg	3.79446	Neg	Neg	3291	CDC	NoLyme	HealthyNonendemic	Neg	0.59	#NULL!	#NULL!	#NULL!	#NULL!	#NULL!	#NULL!	#NULL!	#NULL!	#NULL!	#NULL!	#NULL!	#NULL!	#NULL!	#NULL!	#NULL!	0
3292								3292	NoLyme	HealthyNonendemic	6.94128	Neg	7.55867	Neg	-0.31997	Neg	24.4533	Neg	8.77824	Neg	Neg	3292	CDC	NoLyme	HealthyNonendemic	Neg	0.6	#NULL!	#NULL!	#NULL!	#NULL!	#NULL!	#NULL!	#NULL!	#NULL!	#NULL!	#NULL!	#NULL!	#NULL!	#NULL!	#NULL!	#NULL!	0
3296								3296	NoLyme	HealthyNonendemic	12.3184	Neg	12.7915	Neg	0.955275	Neg	21.7368	Neg	5.91476	Neg	Neg	3296	CDC	NoLyme	HealthyNonendemic	Neg	0.05	#NULL!	#NULL!	#NULL!	#NULL!	#NULL!	#NULL!	#NULL!	#NULL!	#NULL!	#NULL!	#NULL!	#NULL!	#NULL!	#NULL!	#NULL!	0
3298								3298	NoLyme	HealthyNonendemic	11.7982	Neg	12.3215	Neg	1.40013	Neg	8.88369	Neg	5.73989	Neg	Neg	3298	CDC	NoLyme	HealthyNonendemic	Neg	0.09	#NULL!	#NULL!	#NULL!	#NULL!	#NULL!	#NULL!	#NULL!	#NULL!	#NULL!	#NULL!	#NULL!	#NULL!	#NULL!	#NULL!	#NULL!	0
3299								3299	NoLyme	HealthyNonendemic	8.93908	Neg	9.56407	Neg	0.332481	Neg	7.75182	Neg	2.59224	Neg	Neg	3299	CDC	NoLyme	HealthyNonendemic	Neg	0.35	#NULL!	#NULL!	#NULL!	#NULL!	#NULL!	#NULL!	#NULL!	#NULL!	#NULL!	#NULL!	#NULL!	#NULL!	#NULL!	#NULL!	#NULL!	0
3300								3300	NoLyme	HealthyNonendemic	8.33545	Neg	9.09405	Neg	-0.824136	Neg	16.6308	Neg	3.42287	Neg	Neg	3300	CDC	NoLyme	HealthyNonendemic	Neg	0.42	#NULL!	#NULL!	#NULL!	#NULL!	#NULL!	#NULL!	#NULL!	#NULL!	#NULL!	#NULL!	#NULL!	#NULL!	#NULL!	#NULL!	#NULL!	0
3301								3301	NoLyme	HealthyNonendemic	8.82042	Neg	9.47006	Neg	0.332481	Neg	6.82116	Neg	2.41737	Neg	Neg	3301	CDC	NoLyme	HealthyNonendemic	Neg	0.04	#NULL!	#NULL!	#NULL!	#NULL!	#NULL!	#NULL!	#NULL!	#NULL!	#NULL!	#NULL!	#NULL!	#NULL!	#NULL!	#NULL!	#NULL!	0
401								401	NoLyme	HealthyNonendemic	1.10637	Neg	0.471135	Neg	-1.03608	Neg	3.71486	Neg	-4.59965	Neg	Neg	401	CDC	NoLyme	HealthyNonendemic	Neg	0.52	#NULL!	#NULL!	#NULL!	#NULL!	#NULL!	#NULL!	#NULL!	#NULL!	#NULL!	#NULL!	#NULL!	#NULL!	#NULL!	#NULL!	#NULL!	0
402								402	NoLyme	HealthyNonendemic	0.160927	Neg	-0.3693	Neg	-1.48614	Neg	1.16858	Neg	-4.71623	Neg	Neg	402	CDC	NoLyme	HealthyNonendemic	Neg	0.32	#NULL!	#NULL!	#NULL!	#NULL!	#NULL!	#NULL!	#NULL!	#NULL!	#NULL!	#NULL!	#NULL!	#NULL!	#NULL!	#NULL!	#NULL!	0
403								403	NoLyme	HealthyNonendemic	0.35587	Neg	-0.154721	Neg	-1.41113	Neg	1.46679	Neg	-3.69612	Neg	Neg	403	CDC	NoLyme	HealthyNonendemic	Neg	0.14	#NULL!	#NULL!	#NULL!	#NULL!	#NULL!	#NULL!	#NULL!	#NULL!	#NULL!	#NULL!	#NULL!	#NULL!	#NULL!	#NULL!	#NULL!	0
404								404	NoLyme	HealthyNonendemic	0.585144	Neg	0.202911	Neg	-1.61741	Neg	3.48547	Neg	-3.4338	Neg	Neg	404	CDC	NoLyme	HealthyNonendemic	Neg	0.12	#NULL!	#NULL!	#NULL!	#NULL!	#NULL!	#NULL!	#NULL!	#NULL!	#NULL!	#NULL!	#NULL!	#NULL!	#NULL!	#NULL!	#NULL!	0
405								405	NoLyme	HealthyNonendemic	0.732661	Neg	0.328083	Neg	-1.39238	Neg	7.5687	Neg	-4.77453	Neg	Neg	405	CDC	NoLyme	HealthyNonendemic	Neg	0.17	#NULL!	#NULL!	#NULL!	#NULL!	#NULL!	#NULL!	#NULL!	#NULL!	#NULL!	#NULL!	#NULL!	#NULL!	#NULL!	#NULL!	#NULL!	0
406								406	NoLyme	HealthyNonendemic	1.14127	Neg	0.614188	Neg	-1.11109	Neg	3.76074	Neg	-4.45392	Neg	Neg	406	CDC	NoLyme	HealthyNonendemic	Neg	0.08	#NULL!	#NULL!	#NULL!	#NULL!	#NULL!	#NULL!	#NULL!	#NULL!	#NULL!	#NULL!	#NULL!	#NULL!	#NULL!	#NULL!	#NULL!	0
407								407	NoLyme	HealthyNonendemic	1.51261	Neg	1.13275	Neg	-0.0421993	Neg	6.65112	Neg	-2.73429	Neg	Neg	407	CDC	NoLyme	HealthyNonendemic	Neg	0.38	#NULL!	#NULL!	#NULL!	#NULL!	#NULL!	#NULL!	#NULL!	#NULL!	#NULL!	#NULL!	#NULL!	#NULL!	#NULL!	#NULL!	#NULL!	0
408								408	NoLyme	HealthyNonendemic	3.26041	Neg	2.92091	Neg	-0.511012	Neg	14.1982	Neg	-3.55038	Neg	Neg	408	CDC	NoLyme	HealthyNonendemic	Neg	0.36	#NULL!	#NULL!	#NULL!	#NULL!	#NULL!	#NULL!	#NULL!	#NULL!	#NULL!	#NULL!	#NULL!	#NULL!	#NULL!	#NULL!	#NULL!	0
409								409	NoLyme	HealthyNonendemic	-1.00937	Neg	-1.40643	Neg	-1.35488	Neg	4.58656	Neg	-3.84185	Neg	Neg	409	CDC	NoLyme	HealthyNonendemic	Equiv	0.79	0	0	0	0	0	1	0	0	0	0	0	0	0	0	0	0
410								410	NoLyme	HealthyNonendemic	-0.925307	Neg	-1.4422	Neg	-0.86731	Neg	5.20593	Neg	-4.54136	Neg	Neg	410	CDC	NoLyme	HealthyNonendemic	Neg	0.1	#NULL!	#NULL!	#NULL!	#NULL!	#NULL!	#NULL!	#NULL!	#NULL!	#NULL!	#NULL!	#NULL!	#NULL!	#NULL!	#NULL!	#NULL!	0
411								411	NoLyme	HealthyNonendemic	-0.928447	Neg	-1.5316	Neg	1.25172	Neg	5.55002	Neg	-2.96746	Neg	Neg	411	CDC	NoLyme	HealthyNonendemic	Neg	0.15	#NULL!	#NULL!	#NULL!	#NULL!	#NULL!	#NULL!	#NULL!	#NULL!	#NULL!	#NULL!	#NULL!	#NULL!	#NULL!	#NULL!	#NULL!	0
412								412	NoLyme	HealthyNonendemic	3.43942	Neg	3.76135	Neg	-0.529765	Neg	2.54495	Neg	-5.47404	Neg	Neg	412	CDC	NoLyme	HealthyNonendemic	Neg	0.07	#NULL!	#NULL!	#NULL!	#NULL!	#NULL!	#NULL!	#NULL!	#NULL!	#NULL!	#NULL!	#NULL!	#NULL!	#NULL!	#NULL!	#NULL!	0
413								413	NoLyme	HealthyNonendemic	1.35699	Neg	0.721478	Neg	-1.12985	Neg	3.43959	Neg	-4.16246	Neg	Neg	413	CDC	NoLyme	HealthyNonendemic	Neg	0.14	#NULL!	#NULL!	#NULL!	#NULL!	#NULL!	#NULL!	#NULL!	#NULL!	#NULL!	#NULL!	#NULL!	#NULL!	#NULL!	#NULL!	#NULL!	0
414								414	NoLyme	HealthyNonendemic	0.638198	Neg	0.0956217	Neg	-0.923568	Neg	6.03175	Neg	-5.67806	Neg	Neg	414	CDC	NoLyme	HealthyNonendemic	Neg	0.05	#NULL!	#NULL!	#NULL!	#NULL!	#NULL!	#NULL!	#NULL!	#NULL!	#NULL!	#NULL!	#NULL!	#NULL!	#NULL!	#NULL!	#NULL!	0
415								415	NoLyme	HealthyNonendemic	0.724627	Neg	0.292319	Neg	-1.26111	Neg	6.32997	Neg	-1.21868	Neg	Neg	415	CDC	NoLyme	HealthyNonendemic	Neg	0.2	#NULL!	#NULL!	#NULL!	#NULL!	#NULL!	#NULL!	#NULL!	#NULL!	#NULL!	#NULL!	#NULL!	#NULL!	#NULL!	#NULL!	#NULL!	0
416								416	NoLyme	HealthyNonendemic	3.09123	Neg	2.75998	Neg	1.94557	Neg	2.70552	Neg	-6.08611	Neg	Neg	416	CDC	NoLyme	HealthyNonendemic	Neg	0.02	#NULL!	#NULL!	#NULL!	#NULL!	#NULL!	#NULL!	#NULL!	#NULL!	#NULL!	#NULL!	#NULL!	#NULL!	#NULL!	#NULL!	#NULL!	0
417								417	NoLyme	HealthyNonendemic	1.15582	Neg	0.649951	Neg	3.12698	Neg	6.5823	Neg	-3.95843	Neg	Neg	417	CDC	NoLyme	HealthyNonendemic	Neg	0.51	#NULL!	#NULL!	#NULL!	#NULL!	#NULL!	#NULL!	#NULL!	#NULL!	#NULL!	#NULL!	#NULL!	#NULL!	#NULL!	#NULL!	#NULL!	0
418								418	NoLyme	HealthyNonendemic	2.65403	Neg	2.24141	Neg	4.85221	Neg	4.01308	Neg	-5.21172	Neg	Neg	418	CDC	NoLyme	HealthyNonendemic	Neg	0.11	#NULL!	#NULL!	#NULL!	#NULL!	#NULL!	#NULL!	#NULL!	#NULL!	#NULL!	#NULL!	#NULL!	#NULL!	#NULL!	#NULL!	#NULL!	0
419								419	NoLyme	HealthyNonendemic	1.39266	Neg	1.00758	Neg	-0.848558	Neg	0.59509	Neg	-6.1444	Neg	Neg	419	CDC	NoLyme	HealthyNonendemic	Neg	0.03	#NULL!	#NULL!	#NULL!	#NULL!	#NULL!	#NULL!	#NULL!	#NULL!	#NULL!	#NULL!	#NULL!	#NULL!	#NULL!	#NULL!	#NULL!	0
420								420	NoLyme	HealthyNonendemic	3.76943	Neg	3.15338	Neg	-0.454755	Neg	11.4225	Neg	-6.20269	Neg	Neg	420	CDC	NoLyme	HealthyNonendemic	Neg	0.23	#NULL!	#NULL!	#NULL!	#NULL!	#NULL!	#NULL!	#NULL!	#NULL!	#NULL!	#NULL!	#NULL!	#NULL!	#NULL!	#NULL!	#NULL!	0
421								421	NoLyme	HealthyNonendemic	2.6691	Neg	2.18777	Neg	-0.848558	Neg	4.90772	Neg	-5.44489	Neg	Neg	421	CDC	NoLyme	HealthyNonendemic	Neg	0.07	#NULL!	#NULL!	#NULL!	#NULL!	#NULL!	#NULL!	#NULL!	#NULL!	#NULL!	#NULL!	#NULL!	#NULL!	#NULL!	#NULL!	#NULL!	0
422								422	NoLyme	HealthyNonendemic	2.55255	Neg	2.13412	Neg	-1.05484	Neg	3.46253	Neg	-3.60868	Neg	Neg	422	CDC	NoLyme	HealthyNonendemic	Neg	0.17	#NULL!	#NULL!	#NULL!	#NULL!	#NULL!	#NULL!	#NULL!	#NULL!	#NULL!	#NULL!	#NULL!	#NULL!	#NULL!	#NULL!	#NULL!	0
423								423	NoLyme	HealthyNonendemic	2.33393	Neg	1.75861	Neg	-0.49226	Neg	13.3495	Neg	-0.781488	Neg	Neg	423	CDC	NoLyme	HealthyNonendemic	Neg	0.28	#NULL!	#NULL!	#NULL!	#NULL!	#NULL!	#NULL!	#NULL!	#NULL!	#NULL!	#NULL!	#NULL!	#NULL!	#NULL!	#NULL!	#NULL!	0
424								424	NoLyme	HealthyNonendemic	2.23505	Neg	1.81226	Neg	-0.773548	Neg	6.21527	Neg	-2.44283	Neg	Neg	424	CDC	NoLyme	HealthyNonendemic	Neg	0.24	#NULL!	#NULL!	#NULL!	#NULL!	#NULL!	#NULL!	#NULL!	#NULL!	#NULL!	#NULL!	#NULL!	#NULL!	#NULL!	#NULL!	#NULL!	0
425								425	NoLyme	HealthyNonendemic	3.17943	Neg	2.56328	Neg	-0.923568	Neg	1.35209	Neg	-5.88209	Neg	Neg	425	CDC	NoLyme	HealthyNonendemic	Neg	0.08	#NULL!	#NULL!	#NULL!	#NULL!	#NULL!	#NULL!	#NULL!	#NULL!	#NULL!	#NULL!	#NULL!	#NULL!	#NULL!	#NULL!	#NULL!	0
426								426	NoLyme	HealthyNonendemic	0.360542	Neg	-0.136839	Neg	-1.63616	Neg	0.15924	Neg	0.267777	Neg	Neg	426	CDC	NoLyme	HealthyNonendemic	Neg	0.05	#NULL!	#NULL!	#NULL!	#NULL!	#NULL!	#NULL!	#NULL!	#NULL!	#NULL!	#NULL!	#NULL!	#NULL!	#NULL!	#NULL!	#NULL!	0
427								427	NoLyme	HealthyNonendemic	1.03481	Neg	0.596307	Neg	-0.998578	Neg	13.7394	Neg	-4.24989	Neg	Neg	427	CDC	NoLyme	HealthyNonendemic	Neg	0.09	#NULL!	#NULL!	#NULL!	#NULL!	#NULL!	#NULL!	#NULL!	#NULL!	#NULL!	#NULL!	#NULL!	#NULL!	#NULL!	#NULL!	#NULL!	0
428								428	NoLyme	HealthyNonendemic	1.16909	Neg	0.846649	Neg	-0.679785	Neg	8.34864	Neg	0.646679	Neg	Neg	428	CDC	NoLyme	HealthyNonendemic	Neg	0.31	#NULL!	#NULL!	#NULL!	#NULL!	#NULL!	#NULL!	#NULL!	#NULL!	#NULL!	#NULL!	#NULL!	#NULL!	#NULL!	#NULL!	#NULL!	0
429								429	NoLyme	HealthyNonendemic	0.718645	Neg	0.274438	Neg	-0.923568	Neg	9.24328	Neg	-3.52124	Neg	Neg	429	CDC	NoLyme	HealthyNonendemic	Neg	0.22	#NULL!	#NULL!	#NULL!	#NULL!	#NULL!	#NULL!	#NULL!	#NULL!	#NULL!	#NULL!	#NULL!	#NULL!	#NULL!	#NULL!	#NULL!	0
430								430	NoLyme	HealthyNonendemic	1.77249	Neg	1.17478	Neg	1.99252	Neg	1.44183	Neg	-2.20966	Neg	Neg	430	CDC	NoLyme	HealthyNonendemic	Pos	1.11	0	0	1	1	1	1	0	0	0	0	0	0	1	0	0	0
431								431	NoLyme	HealthyNonendemic	2.72177	Neg	2.09165	Neg	1.03644	Neg	0.149647	Neg	-4.80367	Neg	Neg	431	CDC	NoLyme	HealthyNonendemic	Neg	0.1	#NULL!	#NULL!	#NULL!	#NULL!	#NULL!	#NULL!	#NULL!	#NULL!	#NULL!	#NULL!	#NULL!	#NULL!	#NULL!	#NULL!	#NULL!	0
432								432	NoLyme	HealthyNonendemic	1.61344	Neg	1.02552	Neg	1.83317	Neg	6.87425	Neg	-0.606611	Neg	Neg	432	CDC	NoLyme	HealthyNonendemic	Neg	0.18	#NULL!	#NULL!	#NULL!	#NULL!	#NULL!	#NULL!	#NULL!	#NULL!	#NULL!	#NULL!	#NULL!	#NULL!	#NULL!	#NULL!	#NULL!	0
433								433	NoLyme	HealthyNonendemic	1.019	Neg	0.407167	Neg	1.3779	Neg	6.53143	Neg	-0.490026	Neg	Neg	433	CDC	NoLyme	HealthyNonendemic	Neg	0.55	#NULL!	#NULL!	#NULL!	#NULL!	#NULL!	#NULL!	#NULL!	#NULL!	#NULL!	#NULL!	#NULL!	#NULL!	#NULL!	#NULL!	#NULL!	0
434								434	NoLyme	HealthyNonendemic	3.0567	Neg	2.43282	Neg	1.78764	Neg	5.42385	Neg	-5.27001	Neg	Neg	434	CDC	NoLyme	HealthyNonendemic	Neg	0.1	#NULL!	#NULL!	#NULL!	#NULL!	#NULL!	#NULL!	#NULL!	#NULL!	#NULL!	#NULL!	#NULL!	#NULL!	#NULL!	#NULL!	#NULL!	0
435								435	NoLyme	HealthyNonendemic	-0.00976301	Neg	-0.70161	Neg	1.08197	Neg	6.29409	Neg	-1.21868	Neg	Neg	435	CDC	NoLyme	HealthyNonendemic	Neg	0.46	#NULL!	#NULL!	#NULL!	#NULL!	#NULL!	#NULL!	#NULL!	#NULL!	#NULL!	#NULL!	#NULL!	#NULL!	#NULL!	#NULL!	#NULL!	0
436								436	NoLyme	HealthyNonendemic	-1.11002	Neg	-1.76774	Neg	0.990916	Neg	2.49667	Neg	-5.41574	Neg	Neg	436	CDC	NoLyme	HealthyNonendemic	Neg	0.08	#NULL!	#NULL!	#NULL!	#NULL!	#NULL!	#NULL!	#NULL!	#NULL!	#NULL!	#NULL!	#NULL!	#NULL!	#NULL!	#NULL!	#NULL!	0
437								437	NoLyme	HealthyNonendemic	-0.331682	Neg	-0.872191	Neg	0.808807	Neg	2.49667	Neg	-5.15343	Neg	Neg	437	CDC	NoLyme	HealthyNonendemic	Neg	0.2	#NULL!	#NULL!	#NULL!	#NULL!	#NULL!	#NULL!	#NULL!	#NULL!	#NULL!	#NULL!	#NULL!	#NULL!	#NULL!	#NULL!	#NULL!	0
438								438	NoLyme	HealthyNonendemic	1.57769	Neg	1.0042	Neg	2.10633	Neg	47.7757	Neg	-2.8397	Neg	Neg	438	CDC	NoLyme	HealthyNonendemic	Neg	0.22	#NULL!	#NULL!	#NULL!	#NULL!	#NULL!	#NULL!	#NULL!	#NULL!	#NULL!	#NULL!	#NULL!	#NULL!	#NULL!	#NULL!	#NULL!	0
439								439	NoLyme	HealthyNonendemic	0.369288	Neg	-0.403093	Neg	1.35513	Neg	4.65909	Neg	-7.1188	Neg	Neg	439	CDC	NoLyme	HealthyNonendemic	Neg	0.31	#NULL!	#NULL!	#NULL!	#NULL!	#NULL!	#NULL!	#NULL!	#NULL!	#NULL!	#NULL!	#NULL!	#NULL!	#NULL!	#NULL!	#NULL!	0
440								440	NoLyme	HealthyNonendemic	0.115742	Neg	-0.509706	Neg	2.56161	Neg	11.4892	Neg	-5.97956	Neg	Neg	440	CDC	NoLyme	HealthyNonendemic	Neg	0.2	#NULL!	#NULL!	#NULL!	#NULL!	#NULL!	#NULL!	#NULL!	#NULL!	#NULL!	#NULL!	#NULL!	#NULL!	#NULL!	#NULL!	#NULL!	0
441								441	NoLyme	HealthyNonendemic	0.480214	Neg	-0.253835	Neg	4.67863	Neg	3.57788	Neg	-5.47941	Neg	Neg	441	CDC	NoLyme	HealthyNonendemic	Neg	0.2	#NULL!	#NULL!	#NULL!	#NULL!	#NULL!	#NULL!	#NULL!	#NULL!	#NULL!	#NULL!	#NULL!	#NULL!	#NULL!	#NULL!	#NULL!	0
442								442	NoLyme	HealthyNonendemic	-0.664756	Neg	-1.23468	Neg	0.899861	Neg	-0.456886	Neg	-5.95178	Neg	Neg	442	CDC	NoLyme	HealthyNonendemic	Neg	0.1	#NULL!	#NULL!	#NULL!	#NULL!	#NULL!	#NULL!	#NULL!	#NULL!	#NULL!	#NULL!	#NULL!	#NULL!	#NULL!	#NULL!	#NULL!	0
443								443	NoLyme	HealthyNonendemic	0.546685	Neg	-0.125899	Neg	1.15026	Neg	-1.45898	Neg	-4.28459	Neg	Neg	443	CDC	NoLyme	HealthyNonendemic	Equiv	0.9	0	0	0	0	0	1	0	0	1	0	0	0	0	0	0	0
444								444	NoLyme	HealthyNonendemic	-0.0349063	Neg	-0.680287	Neg	1.10473	Neg	8.24554	Neg	-3.17314	Neg	Neg	444	CDC	NoLyme	HealthyNonendemic	Neg	0.14	#NULL!	#NULL!	#NULL!	#NULL!	#NULL!	#NULL!	#NULL!	#NULL!	#NULL!	#NULL!	#NULL!	#NULL!	#NULL!	#NULL!	#NULL!	0
445								445	NoLyme	HealthyNonendemic	0.0119574	Neg	-0.531029	Neg	1.78764	Neg	2.52304	Neg	-5.61834	Neg	Neg	445	CDC	NoLyme	HealthyNonendemic	Neg	0.61	#NULL!	#NULL!	#NULL!	#NULL!	#NULL!	#NULL!	#NULL!	#NULL!	#NULL!	#NULL!	#NULL!	#NULL!	#NULL!	#NULL!	#NULL!	0
446								446	NoLyme	HealthyNonendemic	0.248431	Neg	-0.317802	Neg	1.65106	Neg	9.69595	Neg	5.38506	Neg	Neg	446	CDC	NoLyme	HealthyNonendemic	Neg	0.29	#NULL!	#NULL!	#NULL!	#NULL!	#NULL!	#NULL!	#NULL!	#NULL!	#NULL!	#NULL!	#NULL!	#NULL!	#NULL!	#NULL!	#NULL!	0
447								447	NoLyme	HealthyNonendemic	0.671007	Neg	0.0233595	Neg	0.922625	Neg	-1.30076	Neg	-7.20216	Neg	Neg	447	CDC	NoLyme	HealthyNonendemic	Neg	0.09	#NULL!	#NULL!	#NULL!	#NULL!	#NULL!	#NULL!	#NULL!	#NULL!	#NULL!	#NULL!	#NULL!	#NULL!	#NULL!	#NULL!	#NULL!	0
448								448	NoLyme	HealthyNonendemic	0.643962	Neg	0.00203686	Neg	1.21855	Neg	9.77506	Neg	-4.64582	Neg	Neg	448	CDC	NoLyme	HealthyNonendemic	Neg	0.17	#NULL!	#NULL!	#NULL!	#NULL!	#NULL!	#NULL!	#NULL!	#NULL!	#NULL!	#NULL!	#NULL!	#NULL!	#NULL!	#NULL!	#NULL!	0
449								449	NoLyme	HealthyNonendemic	0.42304	Neg	-0.232512	Neg	1.26408	Neg	-0.351402	Neg	-6.34079	Neg	Neg	449	CDC	NoLyme	HealthyNonendemic	Neg	0.14	#NULL!	#NULL!	#NULL!	#NULL!	#NULL!	#NULL!	#NULL!	#NULL!	#NULL!	#NULL!	#NULL!	#NULL!	#NULL!	#NULL!	#NULL!	0
450								450	NoLyme	HealthyNonendemic	2.84199	Neg	1.98504	Neg	1.51448	Neg	1.83739	Neg	-6.42414	Neg	Neg	450	CDC	NoLyme	HealthyNonendemic	Neg	0.37	#NULL!	#NULL!	#NULL!	#NULL!	#NULL!	#NULL!	#NULL!	#NULL!	#NULL!	#NULL!	#NULL!	#NULL!	#NULL!	#NULL!	#NULL!	0
451								451	NoLyme	HealthyNonendemic	-0.633993	Neg	-1.40526	Neg	1.05921	Neg	5.39747	Neg	-6.53529	Neg	Neg	451	CDC	NoLyme	HealthyNonendemic	Neg	0.16	#NULL!	#NULL!	#NULL!	#NULL!	#NULL!	#NULL!	#NULL!	#NULL!	#NULL!	#NULL!	#NULL!	#NULL!	#NULL!	#NULL!	#NULL!	0
452								452	NoLyme	HealthyNonendemic	1.66005	Neg	1.06817	Neg	2.19739	Neg	1.04626	Neg	-3.89558	Neg	Neg	452	CDC	NoLyme	HealthyNonendemic	Neg	0.32	#NULL!	#NULL!	#NULL!	#NULL!	#NULL!	#NULL!	#NULL!	#NULL!	#NULL!	#NULL!	#NULL!	#NULL!	#NULL!	#NULL!	#NULL!	0
453								453	NoLyme	HealthyNonendemic	2.60924	Neg	1.96372	Neg	2.78924	Neg	3.31417	Neg	-6.53529	Neg	Neg	453	CDC	NoLyme	HealthyNonendemic	Neg	0.32	#NULL!	#NULL!	#NULL!	#NULL!	#NULL!	#NULL!	#NULL!	#NULL!	#NULL!	#NULL!	#NULL!	#NULL!	#NULL!	#NULL!	#NULL!	0
454								454	NoLyme	HealthyNonendemic	1.10077	Neg	0.556425	Neg	1.96975	Neg	20.0334	Neg	-4.22902	Neg	Neg	454	CDC	NoLyme	HealthyNonendemic	Neg	0.11	#NULL!	#NULL!	#NULL!	#NULL!	#NULL!	#NULL!	#NULL!	#NULL!	#NULL!	#NULL!	#NULL!	#NULL!	#NULL!	#NULL!	#NULL!	0
455								455	NoLyme	HealthyNonendemic	1.4136	Neg	0.812297	Neg	2.6299	Neg	8.29828	Neg	-4.17345	Neg	Neg	455	CDC	NoLyme	HealthyNonendemic	Neg	0.5	#NULL!	#NULL!	#NULL!	#NULL!	#NULL!	#NULL!	#NULL!	#NULL!	#NULL!	#NULL!	#NULL!	#NULL!	#NULL!	#NULL!	#NULL!	0
456								456	NoLyme	HealthyNonendemic	-0.0193977	Neg	-0.616319	Neg	1.44619	Neg	16.9216	Neg	-3.33986	Neg	Neg	456	CDC	NoLyme	HealthyNonendemic	Neg	0.16	#NULL!	#NULL!	#NULL!	#NULL!	#NULL!	#NULL!	#NULL!	#NULL!	#NULL!	#NULL!	#NULL!	#NULL!	#NULL!	#NULL!	#NULL!	0
457								457	NoLyme	HealthyNonendemic	0.727548	Neg	0.151295	Neg	1.49172	Neg	8.72022	Neg	-2.11726	Neg	Neg	457	CDC	NoLyme	HealthyNonendemic	Neg	0.12	#NULL!	#NULL!	#NULL!	#NULL!	#NULL!	#NULL!	#NULL!	#NULL!	#NULL!	#NULL!	#NULL!	#NULL!	#NULL!	#NULL!	#NULL!	0
458								458	NoLyme	HealthyNonendemic	0.782567	Neg	0.215263	Neg	1.71935	Neg	1.65279	Neg	-4.42353	Neg	Neg	458	CDC	NoLyme	HealthyNonendemic	Neg	0.32	#NULL!	#NULL!	#NULL!	#NULL!	#NULL!	#NULL!	#NULL!	#NULL!	#NULL!	#NULL!	#NULL!	#NULL!	#NULL!	#NULL!	#NULL!	0
459								459	NoLyme	HealthyNonendemic	1.76379	Neg	1.06817	Neg	1.49172	Neg	15.7349	Neg	-0.338929	Neg	Neg	459	CDC	NoLyme	HealthyNonendemic	Neg	0.26	#NULL!	#NULL!	#NULL!	#NULL!	#NULL!	#NULL!	#NULL!	#NULL!	#NULL!	#NULL!	#NULL!	#NULL!	#NULL!	#NULL!	#NULL!	0
460								460	NoLyme	HealthyNonendemic	-0.436734	Neg	-1.08542	Neg	1.26408	Neg	0.677067	Neg	-3.2565	Neg	Neg	460	CDC	NoLyme	HealthyNonendemic	Neg	0.09	#NULL!	#NULL!	#NULL!	#NULL!	#NULL!	#NULL!	#NULL!	#NULL!	#NULL!	#NULL!	#NULL!	#NULL!	#NULL!	#NULL!	#NULL!	0
461								461	NoLyme	HealthyNonendemic	1.0684	Neg	0.428489	Neg	3.01688	Neg	7.79724	Neg	-3.56215	Neg	Neg	461	CDC	NoLyme	HealthyNonendemic	Neg	0.18	#NULL!	#NULL!	#NULL!	#NULL!	#NULL!	#NULL!	#NULL!	#NULL!	#NULL!	#NULL!	#NULL!	#NULL!	#NULL!	#NULL!	#NULL!	0
462								462	NoLyme	HealthyNonendemic	0.753325	Neg	0.129973	Neg	6.56801	Neg	5.23925	Neg	-3.56215	Neg	Neg	462	CDC	NoLyme	HealthyNonendemic	Neg	0.09	#NULL!	#NULL!	#NULL!	#NULL!	#NULL!	#NULL!	#NULL!	#NULL!	#NULL!	#NULL!	#NULL!	#NULL!	#NULL!	#NULL!	#NULL!	0
463								463	NoLyme	HealthyNonendemic	-0.710775	Neg	-1.34129	Neg	1.08197	Neg	12.0693	Neg	-4.45131	Neg	Neg	463	CDC	NoLyme	HealthyNonendemic	Neg	0.09	#NULL!	#NULL!	#NULL!	#NULL!	#NULL!	#NULL!	#NULL!	#NULL!	#NULL!	#NULL!	#NULL!	#NULL!	#NULL!	#NULL!	#NULL!	0
464								464	NoLyme	HealthyNonendemic	1.43722	Neg	0.684361	Neg	1.33237	Neg	2.44392	Neg	-5.53498	Neg	Neg	464	CDC	NoLyme	HealthyNonendemic	Neg	0.25	#NULL!	#NULL!	#NULL!	#NULL!	#NULL!	#NULL!	#NULL!	#NULL!	#NULL!	#NULL!	#NULL!	#NULL!	#NULL!	#NULL!	#NULL!	0
465								465	NoLyme	HealthyNonendemic	0.484609	Neg	-0.317802	Neg	1.33237	Neg	10.8563	Neg	-2.97863	Neg	Neg	465	CDC	NoLyme	HealthyNonendemic	Neg	0.11	#NULL!	#NULL!	#NULL!	#NULL!	#NULL!	#NULL!	#NULL!	#NULL!	#NULL!	#NULL!	#NULL!	#NULL!	#NULL!	#NULL!	#NULL!	0
466								466	NoLyme	HealthyNonendemic	2.06729	Neg	1.75558	Neg	-5.07288	Neg	20.0538	Neg	-0.755724	Neg	Neg	466	CDC	NoLyme	HealthyNonendemic	Neg	0.1	#NULL!	#NULL!	#NULL!	#NULL!	#NULL!	#NULL!	#NULL!	#NULL!	#NULL!	#NULL!	#NULL!	#NULL!	#NULL!	#NULL!	#NULL!	0
467								467	NoLyme	HealthyNonendemic	0.622876	Neg	-0.104576	Neg	3.40386	Neg	10.197	Neg	1.96734	Neg	Neg	467	CDC	NoLyme	HealthyNonendemic	Neg	0.72	#NULL!	#NULL!	#NULL!	#NULL!	#NULL!	#NULL!	#NULL!	#NULL!	#NULL!	#NULL!	#NULL!	#NULL!	#NULL!	#NULL!	#NULL!	0
468								468	NoLyme	HealthyNonendemic	0.194088	Neg	-0.531029	Neg	1.6283	Neg	8.43014	Neg	-0.839083	Neg	Neg	468	CDC	NoLyme	HealthyNonendemic	Neg	0.34	#NULL!	#NULL!	#NULL!	#NULL!	#NULL!	#NULL!	#NULL!	#NULL!	#NULL!	#NULL!	#NULL!	#NULL!	#NULL!	#NULL!	#NULL!	0
469								469	NoLyme	HealthyNonendemic	0.136237	Neg	-0.594997	Neg	1.51448	Neg	11.5419	Neg	-5.31269	Neg	Neg	469	CDC	NoLyme	HealthyNonendemic	Neg	0.13	#NULL!	#NULL!	#NULL!	#NULL!	#NULL!	#NULL!	#NULL!	#NULL!	#NULL!	#NULL!	#NULL!	#NULL!	#NULL!	#NULL!	#NULL!	0
470								470	NoLyme	HealthyNonendemic	2.51097	Neg	2.24344	Neg	-4.90626	Neg	7.07223	Neg	1.49497	Neg	Neg	470	CDC	NoLyme	HealthyNonendemic	Neg	0.42	#NULL!	#NULL!	#NULL!	#NULL!	#NULL!	#NULL!	#NULL!	#NULL!	#NULL!	#NULL!	#NULL!	#NULL!	#NULL!	#NULL!	#NULL!	0
471								471	NoLyme	HealthyNonendemic	3.78646	Neg	3.49021	Neg	-4.78725	Neg	5.42482	Neg	-3.11757	Neg	Neg	471	CDC	NoLyme	HealthyNonendemic	Equiv	0.93	0	0	0	0	0	1	0	0	1	0	0	0	0	0	0	0
472								472	NoLyme	HealthyNonendemic	6.11541	Neg	5.8934	Neg	-4.69204	Neg	7.64333	Neg	-4.72918	Neg	Neg	472	CDC	NoLyme	HealthyNonendemic	Neg	0.09	#NULL!	#NULL!	#NULL!	#NULL!	#NULL!	#NULL!	#NULL!	#NULL!	#NULL!	#NULL!	#NULL!	#NULL!	#NULL!	#NULL!	#NULL!	0
473								473	NoLyme	HealthyNonendemic	3.77009	Neg	3.49021	Neg	-4.335	Neg	11.3775	Neg	-3.22871	Neg	Neg	473	CDC	NoLyme	HealthyNonendemic	Neg	0.16	#NULL!	#NULL!	#NULL!	#NULL!	#NULL!	#NULL!	#NULL!	#NULL!	#NULL!	#NULL!	#NULL!	#NULL!	#NULL!	#NULL!	#NULL!	0
474								474	NoLyme	HealthyNonendemic	3.01285	Neg	2.6771	Neg	-4.73964	Neg	6.12771	Neg	-4.17345	Neg	Neg	474	CDC	NoLyme	HealthyNonendemic	Neg	0.15	#NULL!	#NULL!	#NULL!	#NULL!	#NULL!	#NULL!	#NULL!	#NULL!	#NULL!	#NULL!	#NULL!	#NULL!	#NULL!	#NULL!	#NULL!	0
475								475	NoLyme	HealthyNonendemic	2.89858	Neg	2.60482	Neg	-4.73964	Neg	14.0133	Neg	-0.394501	Neg	Neg	475	CDC	NoLyme	HealthyNonendemic	Neg	0.48	#NULL!	#NULL!	#NULL!	#NULL!	#NULL!	#NULL!	#NULL!	#NULL!	#NULL!	#NULL!	#NULL!	#NULL!	#NULL!	#NULL!	#NULL!	0
476								476	NoLyme	HealthyNonendemic	2.85905	Neg	2.38799	Neg	-5.04908	Neg	11.1578	Neg	-3.451	Neg	Neg	476	CDC	NoLyme	HealthyNonendemic	Neg	0.17	#NULL!	#NULL!	#NULL!	#NULL!	#NULL!	#NULL!	#NULL!	#NULL!	#NULL!	#NULL!	#NULL!	#NULL!	#NULL!	#NULL!	#NULL!	0
477								477	NoLyme	HealthyNonendemic	2.23713	Neg	2.00854	Neg	-4.57303	Neg	8.82946	Neg	-4.56246	Neg	Neg	477	CDC	NoLyme	HealthyNonendemic	Neg	0.02	#NULL!	#NULL!	#NULL!	#NULL!	#NULL!	#NULL!	#NULL!	#NULL!	#NULL!	#NULL!	#NULL!	#NULL!	#NULL!	#NULL!	#NULL!	0
478								478	NoLyme	HealthyNonendemic	2.84512	Neg	2.56869	Neg	-4.3588	Neg	8.54391	Neg	-4.22902	Neg	Neg	478	CDC	NoLyme	HealthyNonendemic	Neg	0.15	#NULL!	#NULL!	#NULL!	#NULL!	#NULL!	#NULL!	#NULL!	#NULL!	#NULL!	#NULL!	#NULL!	#NULL!	#NULL!	#NULL!	#NULL!	0
479								479	NoLyme	HealthyNonendemic	2.843	Neg	2.47834	Neg	-4.66824	Neg	15.8364	Neg	-0.505647	Neg	Neg	479	CDC	NoLyme	HealthyNonendemic	Neg	0.51	#NULL!	#NULL!	#NULL!	#NULL!	#NULL!	#NULL!	#NULL!	#NULL!	#NULL!	#NULL!	#NULL!	#NULL!	#NULL!	#NULL!	#NULL!	0
480								480	NoLyme	HealthyNonendemic	3.37486	Neg	2.87586	Neg	-3.69233	Neg	9.75201	Neg	-2.00611	Neg	Neg	480	CDC	NoLyme	HealthyNonendemic	Neg	0.16	#NULL!	#NULL!	#NULL!	#NULL!	#NULL!	#NULL!	#NULL!	#NULL!	#NULL!	#NULL!	#NULL!	#NULL!	#NULL!	#NULL!	#NULL!	0
481								481	NoLyme	HealthyNonendemic	1.89694	Neg	1.61102	Neg	-5.14429	Neg	6.41326	Neg	4.33326	Neg	Neg	481	CDC	NoLyme	HealthyNonendemic	Neg	0.13	#NULL!	#NULL!	#NULL!	#NULL!	#NULL!	#NULL!	#NULL!	#NULL!	#NULL!	#NULL!	#NULL!	#NULL!	#NULL!	#NULL!	#NULL!	0
482								482	NoLyme	HealthyNonendemic	2.90882	Neg	2.6771	Neg	-4.76345	Neg	5.46875	Neg	3.57454	Neg	Neg	482	CDC	NoLyme	HealthyNonendemic	Neg	0.17	#NULL!	#NULL!	#NULL!	#NULL!	#NULL!	#NULL!	#NULL!	#NULL!	#NULL!	#NULL!	#NULL!	#NULL!	#NULL!	#NULL!	#NULL!	0
483								483	NoLyme	HealthyNonendemic	2.33246	Neg	2.09889	Neg	-4.26359	Neg	11.8827	Neg	2.0571	Neg	Neg	483	CDC	NoLyme	HealthyNonendemic	Neg	0.25	#NULL!	#NULL!	#NULL!	#NULL!	#NULL!	#NULL!	#NULL!	#NULL!	#NULL!	#NULL!	#NULL!	#NULL!	#NULL!	#NULL!	#NULL!	0
484								484	NoLyme	HealthyNonendemic	3.72802	Neg	3.50828	Neg	-4.73964	Neg	6.36933	Neg	0.98077	Neg	Neg	484	CDC	NoLyme	HealthyNonendemic	Neg	0.47	#NULL!	#NULL!	#NULL!	#NULL!	#NULL!	#NULL!	#NULL!	#NULL!	#NULL!	#NULL!	#NULL!	#NULL!	#NULL!	#NULL!	#NULL!	0
485								485	NoLyme	HealthyNonendemic	2.91119	Neg	2.62289	Neg	-4.21599	Neg	13.7937	Neg	3.41574	Neg	Neg	485	CDC	NoLyme	HealthyNonendemic	Neg	0.21	#NULL!	#NULL!	#NULL!	#NULL!	#NULL!	#NULL!	#NULL!	#NULL!	#NULL!	#NULL!	#NULL!	#NULL!	#NULL!	#NULL!	#NULL!	0
486								486	NoLyme	HealthyNonendemic	2.58546	Neg	2.31572	Neg	-4.335	Neg	18.4284	Neg	5.12727	Neg	Neg	486	CDC	NoLyme	HealthyNonendemic	Neg	0.47	#NULL!	#NULL!	#NULL!	#NULL!	#NULL!	#NULL!	#NULL!	#NULL!	#NULL!	#NULL!	#NULL!	#NULL!	#NULL!	#NULL!	#NULL!	0
487								487	NoLyme	HealthyNonendemic	3.84938	Neg	3.63476	Neg	-5.2871	Neg	3.64562	Neg	0.169115	Neg	Neg	487	CDC	NoLyme	HealthyNonendemic	Neg	0.31	#NULL!	#NULL!	#NULL!	#NULL!	#NULL!	#NULL!	#NULL!	#NULL!	#NULL!	#NULL!	#NULL!	#NULL!	#NULL!	#NULL!	#NULL!	0
488								488	NoLyme	HealthyNonendemic	2.38403	Neg	2.06275	Neg	-4.3112	Neg	8.12657	Neg	4.66851	Neg	Neg	488	CDC	NoLyme	HealthyNonendemic	Neg	0.22	#NULL!	#NULL!	#NULL!	#NULL!	#NULL!	#NULL!	#NULL!	#NULL!	#NULL!	#NULL!	#NULL!	#NULL!	#NULL!	#NULL!	#NULL!	0
489								489	NoLyme	HealthyNonendemic	5.36418	Neg	5.06222	Neg	-4.02557	Neg	18.8018	Neg	3.25693	Neg	Neg	489	CDC	NoLyme	HealthyNonendemic	Neg	0.08	#NULL!	#NULL!	#NULL!	#NULL!	#NULL!	#NULL!	#NULL!	#NULL!	#NULL!	#NULL!	#NULL!	#NULL!	#NULL!	#NULL!	#NULL!	0
490								490	NoLyme	HealthyNonendemic	7.85603	Neg	7.68223	Neg	-4.57303	Neg	11.5312	Neg	3.15107	Neg	Neg	490	CDC	NoLyme	HealthyNonendemic	Neg	0.31	#NULL!	#NULL!	#NULL!	#NULL!	#NULL!	#NULL!	#NULL!	#NULL!	#NULL!	#NULL!	#NULL!	#NULL!	#NULL!	#NULL!	#NULL!	0
491								491	NoLyme	HealthyNonendemic	3.33171	Neg	3.03848	Neg	-3.62092	Neg	7.81905	Neg	1.7042	Neg	Neg	491	CDC	NoLyme	HealthyNonendemic	Neg	0.43	#NULL!	#NULL!	#NULL!	#NULL!	#NULL!	#NULL!	#NULL!	#NULL!	#NULL!	#NULL!	#NULL!	#NULL!	#NULL!	#NULL!	#NULL!	0
492								492	NoLyme	HealthyNonendemic	2.52573	Neg	2.26151	Neg	-4.07317	Neg	7.05026	Neg	1.35131	Neg	Neg	492	CDC	NoLyme	HealthyNonendemic	Neg	0.09	#NULL!	#NULL!	#NULL!	#NULL!	#NULL!	#NULL!	#NULL!	#NULL!	#NULL!	#NULL!	#NULL!	#NULL!	#NULL!	#NULL!	#NULL!	0
493								493	NoLyme	HealthyNonendemic	2.62761	Neg	2.24344	Neg	-4.85866	Neg	6.28147	Neg	0.045602	Neg	Neg	493	CDC	NoLyme	HealthyNonendemic	Neg	0.08	#NULL!	#NULL!	#NULL!	#NULL!	#NULL!	#NULL!	#NULL!	#NULL!	#NULL!	#NULL!	#NULL!	#NULL!	#NULL!	#NULL!	#NULL!	0
494								494	NoLyme	HealthyNonendemic	2.5436	Neg	2.18923	Neg	-4.78725	Neg	10.411	Neg	4.40384	Neg	Neg	494	CDC	NoLyme	HealthyNonendemic	Neg	0.21	#NULL!	#NULL!	#NULL!	#NULL!	#NULL!	#NULL!	#NULL!	#NULL!	#NULL!	#NULL!	#NULL!	#NULL!	#NULL!	#NULL!	#NULL!	0
495								495	NoLyme	HealthyNonendemic	4.54001	Neg	4.21297	Neg	-5.00147	Neg	6.14968	Neg	1.88065	Neg	Neg	495	CDC	NoLyme	HealthyNonendemic	Neg	0.28	#NULL!	#NULL!	#NULL!	#NULL!	#NULL!	#NULL!	#NULL!	#NULL!	#NULL!	#NULL!	#NULL!	#NULL!	#NULL!	#NULL!	#NULL!	0
496								496	NoLyme	HealthyNonendemic	7.45915	Neg	7.19437	Neg	-4.81105	Neg	8.78553	Neg	4.29797	Neg	Neg	496	CDC	NoLyme	HealthyNonendemic	Neg	0.34	#NULL!	#NULL!	#NULL!	#NULL!	#NULL!	#NULL!	#NULL!	#NULL!	#NULL!	#NULL!	#NULL!	#NULL!	#NULL!	#NULL!	#NULL!	0
498								498	NoLyme	HealthyNonendemic	2.65343	Neg	2.49641	Neg	-3.95416	Neg	12.3	Neg	1.61598	Neg	Neg	498	CDC	NoLyme	HealthyNonendemic	Neg	0.3	#NULL!	#NULL!	#NULL!	#NULL!	#NULL!	#NULL!	#NULL!	#NULL!	#NULL!	#NULL!	#NULL!	#NULL!	#NULL!	#NULL!	#NULL!	0
90-0874								90-0874	NoLyme	HealthyNonendemic	6.97229	Neg	7.80934	Neg	3.04701	Neg	7.26679	Neg	19.7949	1	Neg	90-0874	CDC	NoLyme	HealthyNonendemic	Neg	0.26	0	0	0	0	0	1	0	0	0	0	0	0	1	0	0	0
90-0875								90-0875	NoLyme	HealthyNonendemic	8.61449	Neg	9.40739	Neg	3.44673	Neg	3.2024	Neg	19.6783	1	Neg	90-0875	CDC	NoLyme	HealthyNonendemic	Neg	0.08	0	0	0	0	0	1	0	0	0	0	0	0	0	0	0	0
90-0876								90-0876	NoLyme	HealthyNonendemic	4.70099	Neg	5.42793	Neg	4.10343	Neg	1.14925	Neg	19.729	1	Neg	90-0876	CDC	NoLyme	HealthyNonendemic	Neg	0.06	0	0	0	0	0	0	0	0	0	0	0	0	0	0	0	0
90-0877								90-0877	NoLyme	HealthyNonendemic	7.0504	Neg	6.74657	Neg	3.93212	Neg	2.36438	Neg	19.4764	Neg	Neg	90-0877	CDC	NoLyme	HealthyNonendemic	Neg	0.05	0	0	0	0	0	0	0	0	0	0	0	0	0	0	0	0
90-0878								90-0878	NoLyme	HealthyNonendemic	9.17974	Neg	9.0699	Neg	4.07487	Neg	20.1094	Neg	20.2635	1	Neg	90-0878	CDC	NoLyme	HealthyNonendemic	Neg	0.11	0	0	0	0	0	0	0	0	0	0	0	0	0	0	0	0
92-1199								92-1199	NoLyme	HealthyNonendemic	0.0831984	Neg	0.076707	Neg	-0.0369481	Neg	21.4979	Neg	12.7319	Neg	Neg	92-1199	CDC	NoLyme	HealthyNonendemic	Pos	1.24	0	0	1	0	0	1	0	0	0	0	0	0	0	0	1	0
92-1202								92-1202	NoLyme	HealthyNonendemic	-0.372444	Neg	1.85359	Neg	0.892743	Neg	6.1674	Neg	0.461389	Neg	Neg	92-1202	CDC	NoLyme	HealthyNonendemic	Pos	1.23	0	0	0	0	0	1	0	0	0	0	0	0	0	0	1	0
92-1204								92-1204	NoLyme	HealthyNonendemic	-1.0324	Neg	-1.01814	Neg	0.301121	Neg	-0.9884	Neg	8.81878	Neg	Neg	92-1204	CDC	NoLyme	HealthyNonendemic	Neg	0.17	#NULL!	#NULL!	#NULL!	#NULL!	#NULL!	#NULL!	#NULL!	#NULL!	#NULL!	#NULL!	#NULL!	#NULL!	#NULL!	#NULL!	#NULL!	0
92-1207								92-1207	NoLyme	HealthyNonendemic	1.68369	Neg	1.56641	Neg	0.956131	Neg	-2.93136	Neg	2.86519	Neg	Neg	92-1207	CDC	NoLyme	HealthyNonendemic	Neg	0.44	#NULL!	#NULL!	#NULL!	#NULL!	#NULL!	#NULL!	#NULL!	#NULL!	#NULL!	#NULL!	#NULL!	#NULL!	#NULL!	#NULL!	#NULL!	0
92-1209								92-1209	NoLyme	HealthyNonendemic	2.02004	Neg	1.87153	Neg	1.31533	Neg	15.3135	Neg	9.266	Neg	Neg	92-1209	CDC	NoLyme	HealthyNonendemic	Neg	0.24	#NULL!	#NULL!	#NULL!	#NULL!	#NULL!	#NULL!	#NULL!	#NULL!	#NULL!	#NULL!	#NULL!	#NULL!	#NULL!	#NULL!	#NULL!	0
92-1216								92-1216	NoLyme	HealthyNonendemic	4.35972	Neg	4.09712	Neg	1.33646	Neg	2.44733	Neg	4.59816	Neg	Neg	92-1216	CDC	NoLyme	HealthyNonendemic	Neg	0.43	#NULL!	#NULL!	#NULL!	#NULL!	#NULL!	#NULL!	#NULL!	#NULL!	#NULL!	#NULL!	#NULL!	#NULL!	#NULL!	#NULL!	#NULL!	0
92-1218								92-1218	NoLyme	HealthyNonendemic	1.55953	Neg	1.36898	Neg	1.23081	Neg	1.02565	Neg	0.852705	Neg	Neg	92-1218	CDC	NoLyme	HealthyNonendemic	Neg	0.68	#NULL!	#NULL!	#NULL!	#NULL!	#NULL!	#NULL!	#NULL!	#NULL!	#NULL!	#NULL!	#NULL!	#NULL!	#NULL!	#NULL!	#NULL!	0
92-1222								92-1222	NoLyme	HealthyNonendemic	0.83896	Neg	0.615155	Neg	2.8789	Neg	20.8107	Neg	3.3124	Neg	Neg	92-1222	CDC	NoLyme	HealthyNonendemic	Neg	0.12	#NULL!	#NULL!	#NULL!	#NULL!	#NULL!	#NULL!	#NULL!	#NULL!	#NULL!	#NULL!	#NULL!	#NULL!	#NULL!	#NULL!	#NULL!	0
92-1223								92-1223	NoLyme	HealthyNonendemic	-2.11764	Neg	-2.16683	Neg	-0.205983	Neg	3.11078	Neg	14.3252	Neg	Neg	92-1223	CDC	NoLyme	HealthyNonendemic	Neg	0.08	#NULL!	#NULL!	#NULL!	#NULL!	#NULL!	#NULL!	#NULL!	#NULL!	#NULL!	#NULL!	#NULL!	#NULL!	#NULL!	#NULL!	#NULL!	0
92-1224								92-1224	NoLyme	HealthyNonendemic	1.38841	Neg	1.2254	Neg	0.681449	Neg	-0.704064	Neg	2.92109	Neg	Neg	92-1224	CDC	NoLyme	HealthyNonendemic	Neg	0.09	#NULL!	#NULL!	#NULL!	#NULL!	#NULL!	#NULL!	#NULL!	#NULL!	#NULL!	#NULL!	#NULL!	#NULL!	#NULL!	#NULL!	#NULL!	0
92-1225								92-1225	NoLyme	HealthyNonendemic	-0.289309	Neg	-0.407896	Neg	0.322251	Neg	10.5272	Neg	14.8283	Neg	Neg	92-1225	CDC	NoLyme	HealthyNonendemic	Neg	0.18	#NULL!	#NULL!	#NULL!	#NULL!	#NULL!	#NULL!	#NULL!	#NULL!	#NULL!	#NULL!	#NULL!	#NULL!	#NULL!	#NULL!	#NULL!	0
92-1226								92-1226	NoLyme	HealthyNonendemic	-0.00381606	Neg	-0.282258	Neg	0.66032	Neg	17.4224	Neg	27.3783	1	Neg	92-1226	CDC	NoLyme	HealthyNonendemic	Neg	0.19	#NULL!	#NULL!	#NULL!	#NULL!	#NULL!	#NULL!	#NULL!	#NULL!	#NULL!	#NULL!	#NULL!	#NULL!	#NULL!	#NULL!	#NULL!	0
92-1227								92-1227	NoLyme	HealthyNonendemic	-0.361696	Neg	-0.300207	Neg	0.871614	Neg	-0.396033	Neg	5.80006	Neg	Neg	92-1227	CDC	NoLyme	HealthyNonendemic	Neg	0.48	#NULL!	#NULL!	#NULL!	#NULL!	#NULL!	#NULL!	#NULL!	#NULL!	#NULL!	#NULL!	#NULL!	#NULL!	#NULL!	#NULL!	#NULL!	0
92-1228								92-1228	NoLyme	HealthyNonendemic	-0.666691	Neg	-0.730965	Neg	0.808225	Neg	-1.69924	Neg	2.61363	Neg	Neg	92-1228	CDC	NoLyme	HealthyNonendemic	Neg	0.17	#NULL!	#NULL!	#NULL!	#NULL!	#NULL!	#NULL!	#NULL!	#NULL!	#NULL!	#NULL!	#NULL!	#NULL!	#NULL!	#NULL!	#NULL!	0
92-1229								92-1229	NoLyme	HealthyNonendemic	-0.184713	Neg	-0.318155	Neg	0.681449	Neg	2.42364	Neg	-0.153536	Neg	Neg	92-1229	CDC	NoLyme	HealthyNonendemic	Neg	0.25	#NULL!	#NULL!	#NULL!	#NULL!	#NULL!	#NULL!	#NULL!	#NULL!	#NULL!	#NULL!	#NULL!	#NULL!	#NULL!	#NULL!	#NULL!	0
92-1233								92-1233	NoLyme	HealthyNonendemic	0.954339	Neg	0.920276	Neg	1.71679	Neg	6.52282	Neg	5.7162	Neg	Neg	92-1233	CDC	NoLyme	HealthyNonendemic	Neg	0.12	#NULL!	#NULL!	#NULL!	#NULL!	#NULL!	#NULL!	#NULL!	#NULL!	#NULL!	#NULL!	#NULL!	#NULL!	#NULL!	#NULL!	#NULL!	0
92-1234								92-1234	NoLyme	HealthyNonendemic	32.8602	1	33.4246	1	0.575803	Neg	-2.7892	Neg	-3.17226	Neg	Neg	92-1234	CDC	NoLyme	HealthyNonendemic	Neg	0.23	#NULL!	#NULL!	#NULL!	#NULL!	#NULL!	#NULL!	#NULL!	#NULL!	#NULL!	#NULL!	#NULL!	#NULL!	#NULL!	#NULL!	#NULL!	0
92-1235								92-1235	NoLyme	HealthyNonendemic	0.804724	Neg	0.56131	Neg	0.871614	Neg	-0.253865	Neg	8.1759	Neg	Neg	92-1235	CDC	NoLyme	HealthyNonendemic	Neg	0.24	#NULL!	#NULL!	#NULL!	#NULL!	#NULL!	#NULL!	#NULL!	#NULL!	#NULL!	#NULL!	#NULL!	#NULL!	#NULL!	#NULL!	#NULL!	0
92-1236								92-1236	NoLyme	HealthyNonendemic	0.810632	Neg	0.633103	Neg	0.385639	Neg	5.12483	Neg	2.69748	Neg	Neg	92-1236	CDC	NoLyme	HealthyNonendemic	Neg	0.69	#NULL!	#NULL!	#NULL!	#NULL!	#NULL!	#NULL!	#NULL!	#NULL!	#NULL!	#NULL!	#NULL!	#NULL!	#NULL!	#NULL!	#NULL!	0
92-1237								92-1237	NoLyme	HealthyNonendemic	13.4562	Neg	12.9097	Neg	0.681449	Neg	-0.0169179	Neg	4.54225	Neg	Neg	92-1237	CDC	NoLyme	HealthyNonendemic	Neg	0.19	#NULL!	#NULL!	#NULL!	#NULL!	#NULL!	#NULL!	#NULL!	#NULL!	#NULL!	#NULL!	#NULL!	#NULL!	#NULL!	#NULL!	#NULL!	0
92-1238								92-1238	NoLyme	HealthyNonendemic	1.18997	Neg	1.01002	Neg	0.596932	Neg	4.39029	Neg	10.2443	Neg	Neg	92-1238	CDC	NoLyme	HealthyNonendemic	Neg	0.18	#NULL!	#NULL!	#NULL!	#NULL!	#NULL!	#NULL!	#NULL!	#NULL!	#NULL!	#NULL!	#NULL!	#NULL!	#NULL!	#NULL!	#NULL!	0
92-1239								92-1239	NoLyme	HealthyNonendemic	-0.597293	Neg	-0.730965	Neg	0.491285	Neg	27.232	Neg	5.35284	Neg	Neg	92-1239	CDC	NoLyme	HealthyNonendemic	Neg	0.32	#NULL!	#NULL!	#NULL!	#NULL!	#NULL!	#NULL!	#NULL!	#NULL!	#NULL!	#NULL!	#NULL!	#NULL!	#NULL!	#NULL!	#NULL!	0
92-1240								92-1240	NoLyme	HealthyNonendemic	-0.768404	Neg	-1.01814	Neg	0.216604	Neg	0.93087	Neg	-1.74675	Neg	Neg	92-1240	CDC	NoLyme	HealthyNonendemic	Neg	0.29	#NULL!	#NULL!	#NULL!	#NULL!	#NULL!	#NULL!	#NULL!	#NULL!	#NULL!	#NULL!	#NULL!	#NULL!	#NULL!	#NULL!	#NULL!	0
92-1241								92-1241	NoLyme	HealthyNonendemic	-1.21622	Neg	-1.3771	Neg	-0.100336	Neg	1.99713	Neg	10.8592	Neg	Neg	92-1241	CDC	NoLyme	HealthyNonendemic	Neg	0.34	#NULL!	#NULL!	#NULL!	#NULL!	#NULL!	#NULL!	#NULL!	#NULL!	#NULL!	#NULL!	#NULL!	#NULL!	#NULL!	#NULL!	#NULL!	0
92-1242								92-1242	NoLyme	HealthyNonendemic	-0.337247	Neg	-0.246362	Neg	5.07635	Neg	3.98748	Neg	2.50182	Neg	Neg	92-1242	CDC	NoLyme	HealthyNonendemic	Neg	0.21	#NULL!	#NULL!	#NULL!	#NULL!	#NULL!	#NULL!	#NULL!	#NULL!	#NULL!	#NULL!	#NULL!	#NULL!	#NULL!	#NULL!	#NULL!	0
92-1243								92-1243	NoLyme	HealthyNonendemic	0.136973	Neg	0.112604	Neg	0.618061	Neg	-0.656675	Neg	-0.377145	Neg	Neg	92-1243	CDC	NoLyme	HealthyNonendemic	Neg	0.25	#NULL!	#NULL!	#NULL!	#NULL!	#NULL!	#NULL!	#NULL!	#NULL!	#NULL!	#NULL!	#NULL!	#NULL!	#NULL!	#NULL!	#NULL!	0
92-1244								92-1244	NoLyme	HealthyNonendemic	-0.781109	Neg	-0.838655	Neg	0.596932	Neg	18.228	Neg	0.0980243	Neg	Neg	92-1244	CDC	NoLyme	HealthyNonendemic	Neg	0.18	#NULL!	#NULL!	#NULL!	#NULL!	#NULL!	#NULL!	#NULL!	#NULL!	#NULL!	#NULL!	#NULL!	#NULL!	#NULL!	#NULL!	#NULL!	0
92-1246								92-1246	NoLyme	HealthyNonendemic	0.576921	Neg	0.489517	Neg	0.829355	Neg	7.99189	Neg	1.91485	Neg	Neg	92-1246	CDC	NoLyme	HealthyNonendemic	Neg	0.2	#NULL!	#NULL!	#NULL!	#NULL!	#NULL!	#NULL!	#NULL!	#NULL!	#NULL!	#NULL!	#NULL!	#NULL!	#NULL!	#NULL!	#NULL!	0
92-1247								92-1247	NoLyme	HealthyNonendemic	0.340327	Neg	0.166448	Neg	0.575803	Neg	12.8967	Neg	0.153927	Neg	Neg	92-1247	CDC	NoLyme	HealthyNonendemic	Neg	0.1	#NULL!	#NULL!	#NULL!	#NULL!	#NULL!	#NULL!	#NULL!	#NULL!	#NULL!	#NULL!	#NULL!	#NULL!	#NULL!	#NULL!	#NULL!	0
92-1248								92-1248	NoLyme	HealthyNonendemic	3.83553	Neg	3.2715	Neg	0.935002	Neg	13.3706	Neg	13.1233	Neg	Neg	92-1248	CDC	NoLyme	HealthyNonendemic	Neg	0.22	#NULL!	#NULL!	#NULL!	#NULL!	#NULL!	#NULL!	#NULL!	#NULL!	#NULL!	#NULL!	#NULL!	#NULL!	#NULL!	#NULL!	#NULL!	0
92-1249								92-1249	NoLyme	HealthyNonendemic	0.93868	Neg	0.669	Neg	0.744837	Neg	1.64171	Neg	9.99273	Neg	Neg	92-1249	CDC	NoLyme	HealthyNonendemic	Neg	0.42	#NULL!	#NULL!	#NULL!	#NULL!	#NULL!	#NULL!	#NULL!	#NULL!	#NULL!	#NULL!	#NULL!	#NULL!	#NULL!	#NULL!	#NULL!	0
92-1251								92-1251	NoLyme	HealthyNonendemic	0.279719	Neg	-0.0309826	Neg	0.258863	Neg	2.1156	Neg	-0.26534	Neg	Neg	92-1251	CDC	NoLyme	HealthyNonendemic	Neg	0.08	#NULL!	#NULL!	#NULL!	#NULL!	#NULL!	#NULL!	#NULL!	#NULL!	#NULL!	#NULL!	#NULL!	#NULL!	#NULL!	#NULL!	#NULL!	0
92-1275								92-1275	NoLyme	HealthyNonendemic	0.23865	Neg	0.130552	Neg	0.406768	Neg	-0.964706	Neg	-0.908216	Neg	Neg	92-1275	CDC	NoLyme	HealthyNonendemic	Neg	0.33	#NULL!	#NULL!	#NULL!	#NULL!	#NULL!	#NULL!	#NULL!	#NULL!	#NULL!	#NULL!	#NULL!	#NULL!	#NULL!	#NULL!	#NULL!	0
92-1280								92-1280	NoLyme	HealthyNonendemic	0.0685358	Neg	-0.120724	Neg	0.406768	Neg	-4.32935	Neg	-3.33996	Neg	Neg	92-1280	CDC	NoLyme	HealthyNonendemic	Neg	0.25	#NULL!	#NULL!	#NULL!	#NULL!	#NULL!	#NULL!	#NULL!	#NULL!	#NULL!	#NULL!	#NULL!	#NULL!	#NULL!	#NULL!	#NULL!	0
92-1282								92-1282	NoLyme	HealthyNonendemic	-0.00381606	Neg	-0.300207	Neg	0.575803	Neg	-0.656675	Neg	6.49883	Neg	Neg	92-1282	CDC	NoLyme	HealthyNonendemic	Neg	0.07	#NULL!	#NULL!	#NULL!	#NULL!	#NULL!	#NULL!	#NULL!	#NULL!	#NULL!	#NULL!	#NULL!	#NULL!	#NULL!	#NULL!	#NULL!	0
92-1283								92-1283	NoLyme	HealthyNonendemic	-0.871077	Neg	-1.10788	Neg	0.301121	Neg	-1.27274	Neg	-0.684607	Neg	Neg	92-1283	CDC	NoLyme	HealthyNonendemic	Neg	0.1	#NULL!	#NULL!	#NULL!	#NULL!	#NULL!	#NULL!	#NULL!	#NULL!	#NULL!	#NULL!	#NULL!	#NULL!	#NULL!	#NULL!	#NULL!	0
92-1286								92-1286	NoLyme	HealthyNonendemic	-0.14852	Neg	0.0587587	Neg	0.99839	Neg	-3.00245	Neg	-3.47972	Neg	Neg	92-1286	CDC	NoLyme	HealthyNonendemic	Neg	0.24	#NULL!	#NULL!	#NULL!	#NULL!	#NULL!	#NULL!	#NULL!	#NULL!	#NULL!	#NULL!	#NULL!	#NULL!	#NULL!	#NULL!	#NULL!	0
92-1290								92-1290	NoLyme	HealthyNonendemic	-0.95222	Neg	-0.982241	Neg	1.56888	Neg	5.66981	Neg	1.32787	Neg	Neg	92-1290	CDC	NoLyme	HealthyNonendemic	Neg	0.15	#NULL!	#NULL!	#NULL!	#NULL!	#NULL!	#NULL!	#NULL!	#NULL!	#NULL!	#NULL!	#NULL!	#NULL!	#NULL!	#NULL!	#NULL!	0
92-1292								92-1292	NoLyme	HealthyNonendemic	1.49109	Neg	1.49462	Neg	0.956131	Neg	8.32361	Neg	0.992461	Neg	Neg	92-1292	CDC	NoLyme	HealthyNonendemic	Neg	0.11	#NULL!	#NULL!	#NULL!	#NULL!	#NULL!	#NULL!	#NULL!	#NULL!	#NULL!	#NULL!	#NULL!	#NULL!	#NULL!	#NULL!	#NULL!	0
92-1294								92-1294	NoLyme	HealthyNonendemic	1.58789	Neg	1.47667	Neg	1.54775	Neg	-0.0169179	Neg	0.0141709	Neg	Neg	92-1294	CDC	NoLyme	HealthyNonendemic	Neg	0.08	#NULL!	#NULL!	#NULL!	#NULL!	#NULL!	#NULL!	#NULL!	#NULL!	#NULL!	#NULL!	#NULL!	#NULL!	#NULL!	#NULL!	#NULL!	0
92-1296								92-1296	NoLyme	HealthyNonendemic	1.53448	Neg	1.20428	Neg	-1.01733	Neg	1.28328	Neg	0.629096	Neg	Neg	92-1296	CDC	NoLyme	HealthyNonendemic	Neg	0.09	#NULL!	#NULL!	#NULL!	#NULL!	#NULL!	#NULL!	#NULL!	#NULL!	#NULL!	#NULL!	#NULL!	#NULL!	#NULL!	#NULL!	#NULL!	0
92-1300								92-1300	NoLyme	HealthyNonendemic	2.93872	Neg	2.52752	Neg	-0.7923	Neg	0.113361	Neg	-3.0884	Neg	Neg	92-1300	CDC	NoLyme	HealthyNonendemic	Neg	0.31	#NULL!	#NULL!	#NULL!	#NULL!	#NULL!	#NULL!	#NULL!	#NULL!	#NULL!	#NULL!	#NULL!	#NULL!	#NULL!	#NULL!	#NULL!	0
92-1303								92-1303	NoLyme	HealthyNonendemic	0.601	Neg	0.18503	Neg	-1.5049	Neg	-1.37771	Neg	-2.13807	Neg	Neg	92-1303	CDC	NoLyme	HealthyNonendemic	Neg	0.32	#NULL!	#NULL!	#NULL!	#NULL!	#NULL!	#NULL!	#NULL!	#NULL!	#NULL!	#NULL!	#NULL!	#NULL!	#NULL!	#NULL!	#NULL!	0
92-1306								92-1306	NoLyme	HealthyNonendemic	2.42242	Neg	1.99107	Neg	-1.11109	Neg	5.13711	Neg	-5.18257	Neg	Neg	92-1306	CDC	NoLyme	HealthyNonendemic	Neg	0.2	#NULL!	#NULL!	#NULL!	#NULL!	#NULL!	#NULL!	#NULL!	#NULL!	#NULL!	#NULL!	#NULL!	#NULL!	#NULL!	#NULL!	#NULL!	0
92-1317								92-1317	NoLyme	HealthyNonendemic	2.44248	Neg	1.84802	Neg	-1.05484	Neg	5.13711	Neg	-4.89111	Neg	Neg	92-1317	CDC	NoLyme	HealthyNonendemic	Neg	0.07	#NULL!	#NULL!	#NULL!	#NULL!	#NULL!	#NULL!	#NULL!	#NULL!	#NULL!	#NULL!	#NULL!	#NULL!	#NULL!	#NULL!	#NULL!	0
92-1319								92-1319	NoLyme	HealthyNonendemic	2.51819	Neg	1.99107	Neg	-0.848558	Neg	0.916243	Neg	-2.12222	Neg	Neg	92-1319	CDC	NoLyme	HealthyNonendemic	Neg	0.1	#NULL!	#NULL!	#NULL!	#NULL!	#NULL!	#NULL!	#NULL!	#NULL!	#NULL!	#NULL!	#NULL!	#NULL!	#NULL!	#NULL!	#NULL!	0
92-1320								92-1320	NoLyme	HealthyNonendemic	4.81847	Neg	4.13686	Neg	-0.529765	Neg	-0.230732	Neg	-6.69818	Neg	Neg	92-1320	CDC	NoLyme	HealthyNonendemic	Neg	0.05	#NULL!	#NULL!	#NULL!	#NULL!	#NULL!	#NULL!	#NULL!	#NULL!	#NULL!	#NULL!	#NULL!	#NULL!	#NULL!	#NULL!	#NULL!	0
92-1322								92-1322	NoLyme	HealthyNonendemic	3.55604	Neg	2.9388	Neg	-1.29862	Neg	6.697	Neg	-2.676	Neg	Neg	92-1322	CDC	NoLyme	HealthyNonendemic	Neg	0.06	#NULL!	#NULL!	#NULL!	#NULL!	#NULL!	#NULL!	#NULL!	#NULL!	#NULL!	#NULL!	#NULL!	#NULL!	#NULL!	#NULL!	#NULL!	0
92-1323								92-1323	NoLyme	HealthyNonendemic	7.03377	Neg	6.24689	Neg	-0.886063	Neg	1.008	Neg	-6.5816	Neg	Neg	92-1323	CDC	NoLyme	HealthyNonendemic	Neg	0.13	#NULL!	#NULL!	#NULL!	#NULL!	#NULL!	#NULL!	#NULL!	#NULL!	#NULL!	#NULL!	#NULL!	#NULL!	#NULL!	#NULL!	#NULL!	0
111								111	Lyme	LateNeurological	96.748	1	95.6913	1	4.32553	Neg	71.2056	1	2.58458	Neg	1	111	Tufts	Lyme	LateNeurological	Pos	3.67	1	1	1	1	1	1	1	0	1	1	1	0	0	0	1	1
112								112	Lyme	LateNeurological	573.005	1	543.965	1	44.6412	1	16.6832	Neg	14.4453	Neg	1	112	Tufts	Lyme	LateNeurological	Pos	4.48	1	1	1	1	0	1	1	1	1	0	1	0	0	0	0	1
114								114	Lyme	LateNeurological	217.874	1	218.613	1	100.729	1	42.5743	Neg	22.1107	1	1	114	Tufts	Lyme	LateNeurological	Pos	3.84	1	1	1	1	1	1	1	1	1	0	1	0	0	0	1	1
115								115	Lyme	LateNeurological	52.7514	1	53.1117	1	22.9652	1	23.9307	Neg	-0.859695	Neg	1	115	Tufts	Lyme	LateNeurological	Pos	3.2	1	1	0	1	1	1	1	0	1	0	1	0	0	0	0	1
116								116	Lyme	LateNeurological	107.817	1	106.288	1	38.5686	1	21.5746	Neg	-2.18043	Neg	1	116	Tufts	Lyme	LateNeurological	Pos	2.91	1	0	0	1	0	1	1	0	1	0	1	0	0	0	0	1
117								117	Lyme	LateNeurological	135.811	1	133.904	1	7.82574	Neg	21.8307	Neg	1.6005	Neg	1	117	Tufts	Lyme	LateNeurological	Pos	1.23	1	1	1	1	1	1	1	0	0	1	1	0	0	0	1	1
118								118	Lyme	LateNeurological	62.6472	1	62.424	1	28.2788	1	25.7746	Neg	0.823596	Neg	1	118	Tufts	Lyme	LateNeurological	Pos	2.8	1	0	1	1	1	0	1	1	0	0	1	0	0	0	0	1
119								119	Lyme	LateNeurological	92.2831	1	92.6728	1	2.46999	Neg	16.043	Neg	-3.50117	Neg	1	119	Tufts	Lyme	LateNeurological	Pos	4.11	1	0	1	1	1	1	1	0	1	0	1	0	0	0	0	1
120								120	Lyme	LateNeurological	82.6681	1	82.5898	1	41.8579	1	17.221	Neg	2.29971	Neg	1	120	Tufts	Lyme	LateNeurological	Pos	5.51	1	1	0	1	0	0	1	0	1	0	1	0	0	0	0	1
NIH 16								NIH 16	Lyme	LateNeurological	100.361	1	100.197	1	81.1787	1	5.40268	Neg	3.78379	Neg	1	NIH 16	NIH	Lyme	LateNeurological	Pos	7.3	1	1	0	1	1	1	1	1	1	0	1	0	0	0	0	1
NIH 83								NIH 83	Lyme	LateNeurological	188.118	1	191.615	1	43.5438	1	67.1082	1	15.0884	Neg	1	NIH 83	NIH	Lyme	LateNeurological	Pos	10.28	1	1	1	1	1	0	1	1	1	1	1	1	1	1	1	1
Lepto 3529								Lepto 3529	NoLyme	Leptospirosis	2.61802	Neg	1.90723	Neg	15.1989	1	7.67404	Neg	5.17303	Neg	Neg	Lepto 3529	CDC	NoLyme	Leptospirosis	Neg	0.3	#NULL!	#NULL!	#NULL!	#NULL!	#NULL!	#NULL!	#NULL!	#NULL!	#NULL!	#NULL!	#NULL!	#NULL!	#NULL!	#NULL!	#NULL!	0
Lepto 3530								Lepto 3530	NoLyme	Leptospirosis	1.06082	Neg	0.415041	Neg	7.66279	Neg	7.70089	Neg	10.2078	Neg	Neg	Lepto 3530	CDC	NoLyme	Leptospirosis	Pos	1.46	0	0	0	0	0	0	0	0	0	0	0	0	0	0	0	0
Lepto 3531								Lepto 3531	NoLyme	Leptospirosis	21.4189	Neg	21.2212	Neg	5.48775	Neg	1.65857	Neg	5.23518	Neg	Neg	Lepto 3531	CDC	NoLyme	Leptospirosis	Neg	0.49	#NULL!	#NULL!	#NULL!	#NULL!	#NULL!	#NULL!	#NULL!	#NULL!	#NULL!	#NULL!	#NULL!	#NULL!	#NULL!	#NULL!	#NULL!	0
Lepto 3532								Lepto 3532	NoLyme	Leptospirosis	26.0446	1	25.7822	1	5.39584	Neg	8.82879	Neg	9.55512	Neg	Neg	Lepto 3532	CDC	NoLyme	Leptospirosis	Neg	0.31	#NULL!	#NULL!	#NULL!	#NULL!	#NULL!	#NULL!	#NULL!	#NULL!	#NULL!	#NULL!	#NULL!	#NULL!	#NULL!	#NULL!	#NULL!	0
Lepto 3533								Lepto 3533	NoLyme	Leptospirosis	6.7398	Neg	6.1304	Neg	10.6956	1	15.3008	Neg	5.98107	Neg	Neg	Lepto 3533	CDC	NoLyme	Leptospirosis	Equiv	0.96	0	0	0	0	0	0	0	0	0	0	0	0	0	0	0	0
Lepto 3534								Lepto 3534	NoLyme	Leptospirosis	1.54162	Neg	0.752894	Neg	4.47681	Neg	10.6818	Neg	11.078	Neg	Neg	Lepto 3534	CDC	NoLyme	Leptospirosis	Neg	0.34	#NULL!	#NULL!	#NULL!	#NULL!	#NULL!	#NULL!	#NULL!	#NULL!	#NULL!	#NULL!	#NULL!	#NULL!	#NULL!	#NULL!	#NULL!	0
Lepto 3535								Lepto 3535	NoLyme	Leptospirosis	1.25438	Neg	0.640277	Neg	4.35427	Neg	1.22889	Neg	3.21507	Neg	Neg	Lepto 3535	CDC	NoLyme	Leptospirosis	Neg	0.14	#NULL!	#NULL!	#NULL!	#NULL!	#NULL!	#NULL!	#NULL!	#NULL!	#NULL!	#NULL!	#NULL!	#NULL!	#NULL!	#NULL!	#NULL!	0
Lepto 3536								Lepto 3536	NoLyme	Leptospirosis	2.59338	Neg	1.87907	Neg	5.02823	Neg	16.2138	Neg	9.49296	Neg	Neg	Lepto 3536	CDC	NoLyme	Leptospirosis	Neg	0.35	#NULL!	#NULL!	#NULL!	#NULL!	#NULL!	#NULL!	#NULL!	#NULL!	#NULL!	#NULL!	#NULL!	#NULL!	#NULL!	#NULL!	#NULL!	0
Lepto 3537								Lepto 3537	NoLyme	Leptospirosis	0.478857	Neg	-0.148048	Neg	5.2733	Neg	9.66129	Neg	13.844	Neg	Neg	Lepto 3537	CDC	NoLyme	Leptospirosis	Neg	0.37	#NULL!	#NULL!	#NULL!	#NULL!	#NULL!	#NULL!	#NULL!	#NULL!	#NULL!	#NULL!	#NULL!	#NULL!	#NULL!	#NULL!	#NULL!	0
Lepto 3538								Lepto 3538	NoLyme	Leptospirosis	0.523236	Neg	-0.176203	Neg	4.53808	Neg	12.5079	Neg	13.6264	Neg	Neg	Lepto 3538	CDC	NoLyme	Leptospirosis	Pos	2.76	0	0	0	0	0	0	0	0	0	0	0	0	0	0	0	0
101								101	Lyme	LymeArthritis	356.685	1	350.398	1	34.2249	1	15.7613	Neg	36.3799	1	1	101	Tufts	Lyme	LymeArthritis	Pos	4.14	1	1	1	1	1	1	1	1	1	0	1	0	1	0	0	1
105								105	Lyme	LymeArthritis	451.876	1	438.768	1	106.97	1	24.2636	Neg	37.0532	1	1	105	Tufts	Lyme	LymeArthritis	Pos	6.75	1	1	1	1	1	0	1	1	1	1	1	0	0	1	0	1
106								106	Lyme	LymeArthritis	1393	1	776.9	1	99.8434	1	20.6783	Neg	23.4315	1	1	106	Tufts	Lyme	LymeArthritis	Pos	8.49	1	1	1	1	0	0	1	1	1	1	1	1	1	1	0	1
107								107	Lyme	LymeArthritis	61.1487	1	62.5524	1	23.893	1	37.0939	Neg	-1.06687	Neg	1	107	Tufts	Lyme	LymeArthritis	Pos	5.27	1	1	0	1	0	1	1	1	1	1	1	0	0	0	1	1
109								109	Lyme	LymeArthritis	331.068	1	330.296	1	94.4455	1	15.9662	Neg	15.2481	Neg	1	109	Tufts	Lyme	LymeArthritis	Pos	6.61	1	1	1	1	1	1	1	1	1	0	1	0	0	0	0	1
61								61	Lyme	LymeArthritis	97.04	1	96.5313	1	63.9866	1	15.3942	Neg	17.0608	Neg	1	61	Tufts	Lyme	LymeArthritis	Pos	6.11	1	1	0	1	0	0	1	1	0	0	1	0	0	0	0	1
67								67	Lyme	LymeArthritis	59.4351	1	60.4993	1	27.8825	1	2.4191	Neg	11.5513	Neg	1	67	Tufts	Lyme	LymeArthritis	Pos	5.7	1	1	1	1	1	1	1	1	1	0	1	0	1	0	0	1
68								68	Lyme	LymeArthritis	38.7491	1	39.9615	1	25.0138	1	30.4216	Neg	12.4529	Neg	1	68	Tufts	Lyme	LymeArthritis	Pos	5.11	1	0	1	1	1	1	1	1	1	0	1	0	0	0	0	1
69								69	Lyme	LymeArthritis	161.734	1	166.187	1	63.4129	1	2.0881	Neg	15.7586	Neg	1	69	Tufts	Lyme	LymeArthritis	Pos	5.62	1	1	1	1	1	1	1	1	1	0	1	0	1	0	0	1
70								70	Lyme	LymeArthritis	380.013	1	372.155	1	55.0118	1	15.0963	Neg	18.7303	Neg	1	70	Tufts	Lyme	LymeArthritis	Pos	6.01	1	1	1	1	1	1	1	1	1	0	1	0	1	0	0	1
71								71	Lyme	LymeArthritis	112.12	1	112.071	1	36.2426	1	8.60877	Neg	26.7107	1	1	71	Tufts	Lyme	LymeArthritis	Pos	6.29	1	1	1	1	0	1	1	1	1	0	1	0	0	0	0	1
72								72	Lyme	LymeArthritis	71.2984	1	71.0408	1	17.1865	1	22.9079	Neg	9.68146	Neg	1	72	Tufts	Lyme	LymeArthritis	Pos	5.18	1	1	0	1	1	1	1	0	1	1	1	0	0	0	0	1
73								73	Lyme	LymeArthritis	103.135	1	102.847	1	46.119	1	6.02698	Neg	13.1541	Neg	1	73	Tufts	Lyme	LymeArthritis	Pos	8.66	1	1	0	1	1	1	1	0	0	0	0	0	0	1	0	1
74								74	Lyme	LymeArthritis	262.421	1	266.059	1	90.993	1	15.6921	Neg	19.1978	Neg	1	74	Tufts	Lyme	LymeArthritis	Pos	6.56	1	1	1	1	1	1	1	1	1	1	1	0	0	0	1	1
76								76	Lyme	LymeArthritis	310.876	1	310.042	1	62.0196	1	84.3743	1	28.2133	1	1	76	Tufts	Lyme	LymeArthritis	Pos	5.96	1	1	1	1	0	0	1	1	1	1	1	0	0	0	1	1
78								78	Lyme	LymeArthritis	354.773	1	349.255	1	89.1899	1	9.83346	Neg	28.0797	1	1	78	Tufts	Lyme	LymeArthritis	Pos	2.3	1	1	1	1	0	1	1	1	1	1	1	0	1	0	0	1
79								79	Lyme	LymeArthritis	49.294	1	50.0941	1	23.6614	1	2.8494	Neg	9.78163	Neg	1	79	Tufts	Lyme	LymeArthritis	Pos	4.58	1	1	1	1	1	1	1	1	1	0	1	0	0	0	0	1
80								80	Lyme	LymeArthritis	330.276	1	328.49	1	85.0918	1	37.7697	Neg	31.9531	1	1	80	Tufts	Lyme	LymeArthritis	Pos	7.78	1	1	1	1	0	1	1	1	1	1	1	1	1	0	1	1
82								82	Lyme	LymeArthritis	62.7628	1	63.6345	1	14.2358	1	14.3784	Neg	-2.51709	Neg	1	82	Tufts	Lyme	LymeArthritis	Pos	5.29	1	1	0	1	0	0	1	1	0	1	1	0	0	0	0	1
84								84	Lyme	LymeArthritis	4.32421	Neg	7.25675	Neg	4.87375	Neg	21.0881	Neg	0.0725893	Neg	Neg	84	Tufts	Lyme	LymeArthritis	Neg	0.14	#NULL!	#NULL!	#NULL!	#NULL!	#NULL!	#NULL!	#NULL!	#NULL!	#NULL!	#NULL!	#NULL!	#NULL!	#NULL!	#NULL!	#NULL!	0
86								86	Lyme	LymeArthritis	266.779	1	270.056	1	3.14473	Neg	16.8369	Neg	23.5869	1	1	86	Tufts	Lyme	LymeArthritis	Pos	7.1	1	1	1	1	1	1	1	1	1	0	1	1	1	1	0	1
87								87	Lyme	LymeArthritis	215.414	1	213.604	1	12.9285	1	18.7832	Neg	10.509	Neg	1	87	Tufts	Lyme	LymeArthritis	Pos	5.92	1	1	1	1	0	1	1	1	1	1	1	0	1	0	0	1
89								89	Lyme	LymeArthritis	121.566	1	115.151	1	43.4604	1	34.9683	Neg	-0.341759	Neg	1	89	Tufts	Lyme	LymeArthritis	Pos	5.33	1	1	0	1	0	1	1	0	1	1	1	0	0	0	0	1
90								90	Lyme	LymeArthritis	320.281	1	317.195	1	51.5151	1	27.3624	Neg	45.4437	1	1	90	Tufts	Lyme	LymeArthritis	Pos	7.57	1	1	0	1	0	0	1	1	1	1	1	1	1	0	1	1
91								91	Lyme	LymeArthritis	248.346	1	245.715	1	47.9728	1	19.9612	Neg	5.22605	Neg	1	91	Tufts	Lyme	LymeArthritis	Pos	5.43	1	1	0	1	1	1	1	0	1	1	1	0	0	0	0	1
92								92	Lyme	LymeArthritis	280.145	1	277.57	1	44.0087	1	15.9918	Neg	20.8418	1	1	92	Tufts	Lyme	LymeArthritis	Pos	7.52	1	1	1	1	1	1	1	1	1	1	1	0	0	0	1	1
93								93	Lyme	LymeArthritis	99.1222	1	97.4895	1	48.1836	1	17.9637	Neg	-0.289966	Neg	1	93	Tufts	Lyme	LymeArthritis	Pos	5.18	1	1	0	1	1	1	1	0	1	1	1	0	0	0	0	1
94								94	Lyme	LymeArthritis	607.659	1	576.012	1	59.6964	1	75.0982	1	14.9114	Neg	1	94	Tufts	Lyme	LymeArthritis	Pos	6.2	1	1	1	1	1	0	1	0	1	1	1	0	0	0	1	1
95								95	Lyme	LymeArthritis	201.423	1	199.989	1	13.1815	1	245.887	1	9.86157	Neg	1	95	Tufts	Lyme	LymeArthritis	Pos	5.2	1	1	0	1	0	1	1	0	1	1	1	1	1	0	1	1
96								96	Lyme	LymeArthritis	237.199	1	240.963	1	73.3177	1	54.4058	Neg	22.3697	1	1	96	Tufts	Lyme	LymeArthritis	Pos	5.85	1	1	1	1	1	1	1	0	1	0	1	1	1	0	1	1
97								97	Lyme	LymeArthritis	408.339	1	401.134	1	76.101	1	39.8085	Neg	22.7841	1	1	97	Tufts	Lyme	LymeArthritis	Pos	6.2	1	1	1	1	0	1	1	1	1	0	1	0	0	0	0	1
99								99	Lyme	LymeArthritis	310.452	1	308.589	1	50.9669	1	41.7292	Neg	50.5195	1	1	99	Tufts	Lyme	LymeArthritis	Pos	2.9	1	1	1	1	0	1	1	1	1	1	1	0	0	0	1	1
NIH 85								NIH 85	Lyme	LymeArthritis	107.982	1	107.87	1	57.7043	1	10.9529	Neg	10.6375	Neg	1	NIH 85	NIH	Lyme	LymeArthritis	Pos	8.22	1	1	1	1	1	1	1	1	0	1	1	0	0	1	0	1
100								100	Lyme	LymeArthritisConvalescent	557.756	1	535.231	1	35.5744	1	24.7502	Neg	34.7225	1	1	100	Tufts	Lyme	LymeArthritisConvalescent	Pos	2.03	1	1	0	1	0	1	1	1	1	1	1	1	1	1	1	1
102								102	Lyme	LymeArthritisConvalescent	168.958	1	165.887	1	72.1791	1	25.2112	Neg	24.9076	1	1	102	Tufts	Lyme	LymeArthritisConvalescent	Pos	6.89	1	1	0	1	0	1	1	1	1	0	1	1	1	0	1	1
103								103	Lyme	LymeArthritisConvalescent	999.612	1	927.181	1	45.0208	1	16.1711	Neg	17.7342	Neg	1	103	Tufts	Lyme	LymeArthritisConvalescent	Pos	5.82	1	1	1	1	0	1	1	1	1	1	1	0	0	0	1	1
104								104	Lyme	LymeArthritisConvalescent	322.657	1	319.828	1	37.5565	1	32.1257	Neg	28.1706	1	1	104	Tufts	Lyme	LymeArthritisConvalescent	Pos	6.25	1	1	1	1	0	0	1	1	1	1	1	1	1	0	1	1
110								110	Lyme	LymeArthritisConvalescent	164.484	1	164.409	1	34.3093	1	80.9371	1	4.96708	Neg	1	110	Tufts	Lyme	LymeArthritisConvalescent	Pos	1.84	1	0	0	1	0	1	1	1	0	0	1	0	0	0	1	1
62								62	Lyme	LymeArthritisConvalescent	85.0274	1	84.6721	1	31.8166	1	47.799	Neg	17.6618	Neg	1	62	Tufts	Lyme	LymeArthritisConvalescent	Pos	3	1	1	0	1	0	1	1	0	1	1	1	0	0	0	1	1
63								63	Lyme	LymeArthritisConvalescent	73.6749	1	73.4036	1	30.3003	1	5.00089	Neg	8.446	Neg	1	63	Tufts	Lyme	LymeArthritisConvalescent	Pos	8.46	1	1	0	1	0	0	1	1	0	0	1	0	0	0	0	1
64								64	Lyme	LymeArthritisConvalescent	204.772	1	210.489	1	56.9789	1	14.7322	Neg	9.44773	Neg	1	64	Tufts	Lyme	LymeArthritisConvalescent	Pos	7.95	1	1	0	1	1	0	1	1	0	0	1	0	0	0	0	1
65								65	Lyme	LymeArthritisConvalescent	53.863	1	54.1381	1	6.53143	Neg	1.75711	Neg	10.0488	Neg	Neg	65	Tufts	Lyme	LymeArthritisConvalescent	Pos	2.52	0	0	0	1	0	1	0	1	0	0	1	0	1	0	0	0
66								66	Lyme	LymeArthritisConvalescent	159.265	1	163.961	1	26.9809	1	44.1911	Neg	9.9152	Neg	1	66	Tufts	Lyme	LymeArthritisConvalescent	Pos	3.39	1	1	0	1	0	1	1	1	1	1	1	0	0	0	1	1
75								75	Lyme	LymeArthritisConvalescent	75.6553	1	75.8117	1	20.5879	1	1.52541	Neg	13.3544	Neg	1	75	Tufts	Lyme	LymeArthritisConvalescent	Pos	4.76	1	1	1	1	0	1	1	1	1	0	1	0	0	0	0	1
77								77	Lyme	LymeArthritisConvalescent	60.8605	1	61.4081	1	15.5472	1	60.8072	1	9.84841	Neg	1	77	Tufts	Lyme	LymeArthritisConvalescent	Pos	3.18	0	0	0	0	0	1	0	0	0	1	1	1	0	0	1	1
81								81	Lyme	LymeArthritisConvalescent	321.304	1	322.492	1	27.6884	1	17.1442	Neg	20.8159	1	1	81	Tufts	Lyme	LymeArthritisConvalescent	Pos	7.52	1	1	1	1	0	1	1	1	1	0	0	0	1	0	0	1
83								83	Lyme	LymeArthritisConvalescent	5.6848	Neg	8.15586	Neg	6.89797	Neg	18.0918	Neg	-2.95733	Neg	1	83	Tufts	Lyme	LymeArthritisConvalescent	Pos	2.34	1	1	0	1	0	1	1	0	1	0	1	0	0	0	0	1
85								85	Lyme	LymeArthritisConvalescent	7.75027	Neg	10.789	Neg	6.39192	Neg	14.9162	Neg	-2.72426	Neg	1	85	Tufts	Lyme	LymeArthritisConvalescent	Pos	1.49	1	1	0	1	0	1	1	0	0	0	1	0	0	0	0	1
88								88	Lyme	LymeArthritisConvalescent	196.487	1	193.823	1	40.7193	1	13.3796	Neg	3.38738	Neg	1	88	Tufts	Lyme	LymeArthritisConvalescent	Pos	8	1	1	1	1	1	1	1	1	1	0	1	0	1	0	0	1
90-2111								90-2111	Lyme	LymeArthritisConvalescent	75.0165	1	77.9014	1	52.5845	1	4.96224	Neg	19.8393	1	1	90-2111	CDC	Lyme	LymeArthritisConvalescent	Pos	6.9	1	1	1	1	1	1	1	1	1	0	1	0	1	0	0	1
91-0521								91-0521	Lyme	LymeArthritisConvalescent	19.2837	Neg	18.8795	Neg	10.8988	1	9.69704	Neg	19.8989	1	1	91-0521	CDC	Lyme	LymeArthritisConvalescent	Pos	5.75	1	1	0	1	1	1	1	1	0	0	0	0	1	0	0	1
91-0531								91-0531	Lyme	LymeArthritisConvalescent	193.238	1	199.982	1	121.509	1	1.54731	Neg	21.2389	1	1	91-0531	CDC	Lyme	LymeArthritisConvalescent	Pos	7.48	1	1	1	1	1	1	1	1	1	0	1	0	1	0	0	1
91-0532								91-0532	Lyme	LymeArthritisConvalescent	80.7037	1	85.0122	1	18.2081	1	0.772143	Neg	19.9259	1	1	91-0532	CDC	Lyme	LymeArthritisConvalescent	Pos	3.51	1	1	0	1	0	1	1	1	1	0	1	0	0	0	0	1
91-0544								91-0544	Lyme	LymeArthritisConvalescent	265.457	1	267.804	1	51.8707	1	4.20802	Neg	16.9829	Neg	1	91-0544	CDC	Lyme	LymeArthritisConvalescent	Pos	8.45	1	1	1	1	1	1	1	1	1	1	1	1	1	0	1	1
91-0794								91-0794	Lyme	LymeArthritisConvalescent	25.2989	1	25.2159	1	13.7825	1	0.981648	Neg	19.7958	1	1	91-0794	CDC	Lyme	LymeArthritisConvalescent	Pos	5.49	1	1	0	1	0	1	1	0	1	0	1	0	1	0	0	1
91-0900								91-0900	Lyme	LymeArthritisConvalescent	34.5227	1	34.3684	1	13.7254	1	-1.72096	Neg	6.69588	Neg	1	91-0900	CDC	Lyme	LymeArthritisConvalescent	Pos	8.18	1	1	1	1	1	1	1	1	1	1	1	0	1	0	0	1
91-0943								91-0943	Lyme	LymeArthritisConvalescent	48.9756	1	50.1858	1	31.6274	1	0.457886	Neg	20.3441	1	1	91-0943	CDC	Lyme	LymeArthritisConvalescent	Pos	3.77	1	1	0	1	0	1	1	1	1	1	1	0	0	0	0	1
NIH 63								NIH 63	NoLyme	MultipleSclerosis	5.93083	Neg	8.51778	Neg	-0.87364	Neg	6.12323	Neg	5.35479	Neg	Neg	NIH 63	NIH	NoLyme	MultipleSclerosis	Neg	0.06	#NULL!	#NULL!	#NULL!	#NULL!	#NULL!	#NULL!	#NULL!	#NULL!	#NULL!	#NULL!	#NULL!	#NULL!	#NULL!	#NULL!	#NULL!	0
NIH 64								NIH 64	NoLyme	MultipleSclerosis	8.73559	Neg	11.3191	Neg	2.25967	Neg	8.18857	Neg	3.83082	Neg	Neg	NIH 64	NIH	NoLyme	MultipleSclerosis	Neg	0.31	#NULL!	#NULL!	#NULL!	#NULL!	#NULL!	#NULL!	#NULL!	#NULL!	#NULL!	#NULL!	#NULL!	#NULL!	#NULL!	#NULL!	#NULL!	0
NIH 66								NIH 66	NoLyme	MultipleSclerosis	7.35928	Neg	9.66823	Neg	1.78132	Neg	14.0876	Neg	6.66418	Neg	Neg	NIH 66	NIH	NoLyme	MultipleSclerosis	Neg	0.58	#NULL!	#NULL!	#NULL!	#NULL!	#NULL!	#NULL!	#NULL!	#NULL!	#NULL!	#NULL!	#NULL!	#NULL!	#NULL!	#NULL!	#NULL!	0
NIH 67								NIH 67	NoLyme	MultipleSclerosis	7.9357	Neg	10.1156	Neg	0.774866	Neg	16.6313	Neg	8.57886	Neg	Neg	NIH 67	NIH	NoLyme	MultipleSclerosis	Neg	0.42	#NULL!	#NULL!	#NULL!	#NULL!	#NULL!	#NULL!	#NULL!	#NULL!	#NULL!	#NULL!	#NULL!	#NULL!	#NULL!	#NULL!	#NULL!	0
NIH 70								NIH 70	NoLyme	MultipleSclerosis	6.46523	Neg	8.90126	Neg	-0.526586	Neg	8.79038	Neg	6.35536	Neg	Neg	NIH 70	NIH	NoLyme	MultipleSclerosis	Neg	0.07	#NULL!	#NULL!	#NULL!	#NULL!	#NULL!	#NULL!	#NULL!	#NULL!	#NULL!	#NULL!	#NULL!	#NULL!	#NULL!	#NULL!	#NULL!	0
NIH 72								NIH 72	NoLyme	MultipleSclerosis	7.2121	Neg	9.42742	Neg	2.37751	Neg	17.4405	Neg	5.73157	Neg	Neg	NIH 72	NIH	NoLyme	MultipleSclerosis	Neg	0.24	#NULL!	#NULL!	#NULL!	#NULL!	#NULL!	#NULL!	#NULL!	#NULL!	#NULL!	#NULL!	#NULL!	#NULL!	#NULL!	#NULL!	#NULL!	0
NIH 76								NIH 76	NoLyme	MultipleSclerosis	6.36837	Neg	8.83735	Neg	-0.960403	Neg	12.433	Neg	7.43005	Neg	Neg	NIH 76	NIH	NoLyme	MultipleSclerosis	Neg	0.23	#NULL!	#NULL!	#NULL!	#NULL!	#NULL!	#NULL!	#NULL!	#NULL!	#NULL!	#NULL!	#NULL!	#NULL!	#NULL!	#NULL!	#NULL!	0
NIH 81								NIH 81	NoLyme	MultipleSclerosis	5.69414	Neg	8.07038	Neg	0.937563	Neg	9.08539	Neg	8.96179	Neg	Neg	NIH 81	NIH	NoLyme	MultipleSclerosis	Neg	0.32	#NULL!	#NULL!	#NULL!	#NULL!	#NULL!	#NULL!	#NULL!	#NULL!	#NULL!	#NULL!	#NULL!	#NULL!	#NULL!	#NULL!	#NULL!	0
NIH 89								NIH 89	NoLyme	MultipleSclerosis	7.52127	Neg	9.91154	Neg	4.05509	Neg	10.4057	Neg	5.38299	Neg	Neg	NIH 89	NIH	NoLyme	MultipleSclerosis	Neg	0.22	#NULL!	#NULL!	#NULL!	#NULL!	#NULL!	#NULL!	#NULL!	#NULL!	#NULL!	#NULL!	#NULL!	#NULL!	#NULL!	#NULL!	#NULL!	0
NIH 98								NIH 98	NoLyme	MultipleSclerosis	8.57851	Neg	11.2406	Neg	2.69724	Neg	9.7515	Neg	8.71175	Neg	Neg	NIH 98	NIH	NoLyme	MultipleSclerosis	Neg	0.31	#NULL!	#NULL!	#NULL!	#NULL!	#NULL!	#NULL!	#NULL!	#NULL!	#NULL!	#NULL!	#NULL!	#NULL!	#NULL!	#NULL!	#NULL!	0
NIH 13								NIH 13	NoLyme	RapidPlasmaReagin	12.9227	Neg	15.0247	Neg	-1.9332	Neg	9.5751	Neg	6.97524	Neg	Neg	NIH 13	NIH	NoLyme	RapidPlasmaReagin	Neg	0.16	#NULL!	#NULL!	#NULL!	#NULL!	#NULL!	#NULL!	#NULL!	#NULL!	#NULL!	#NULL!	#NULL!	#NULL!	#NULL!	#NULL!	#NULL!	0
NIH 19								NIH 19	NoLyme	RapidPlasmaReagin	15.0643	Neg	17.3717	Neg	-0.856323	Neg	25.155	Neg	9.70697	Neg	Neg	NIH 19	NIH	NoLyme	RapidPlasmaReagin	Pos	1.28	0	0	0	0	0	0	0	0	0	0	0	0	0	0	0	0
NIH 23								NIH 23	NoLyme	RapidPlasmaReagin	9.12828	Neg	11.4764	Neg	-2.82467	Neg	9.78048	Neg	5.14658	Neg	Neg	NIH 23	NIH	NoLyme	RapidPlasmaReagin	Neg	0.22	#NULL!	#NULL!	#NULL!	#NULL!	#NULL!	#NULL!	#NULL!	#NULL!	#NULL!	#NULL!	#NULL!	#NULL!	#NULL!	#NULL!	#NULL!	0
NIH 31								NIH 31	NoLyme	RapidPlasmaReagin	23.7545	1	25.0748	1	-0.889129	Neg	8.16741	Neg	3.25692	Neg	Neg	NIH 31	NIH	NoLyme	RapidPlasmaReagin	Neg	0.11	#NULL!	#NULL!	#NULL!	#NULL!	#NULL!	#NULL!	#NULL!	#NULL!	#NULL!	#NULL!	#NULL!	#NULL!	#NULL!	#NULL!	#NULL!	0
NIH 34								NIH 34	NoLyme	RapidPlasmaReagin	16.8866	Neg	18.156	Neg	-1.3156	Neg	9.47803	Neg	4.2793	Neg	Neg	NIH 34	NIH	NoLyme	RapidPlasmaReagin	Neg	0.13	#NULL!	#NULL!	#NULL!	#NULL!	#NULL!	#NULL!	#NULL!	#NULL!	#NULL!	#NULL!	#NULL!	#NULL!	#NULL!	#NULL!	#NULL!	0
NIH 39								NIH 39	NoLyme	RapidPlasmaReagin	16.1445	Neg	17.7384	Neg	-0.265819	Neg	5.44537	Neg	3.84047	Neg	Neg	NIH 39	NIH	NoLyme	RapidPlasmaReagin	Pos	1.22	0	0	0	0	0	0	0	0	0	0	0	0	0	0	0	0
NIH 55								NIH 55	NoLyme	RapidPlasmaReagin	5.86286	Neg	8.19821	Neg	-0.752171	Neg	10.4327	Neg	6.7383	Neg	Neg	NIH 55	NIH	NoLyme	RapidPlasmaReagin	Neg	0.23	#NULL!	#NULL!	#NULL!	#NULL!	#NULL!	#NULL!	#NULL!	#NULL!	#NULL!	#NULL!	#NULL!	#NULL!	#NULL!	#NULL!	#NULL!	0
NIH 73								NIH 73	NoLyme	RapidPlasmaReagin	7.5081	Neg	10.2435	Neg	0.269455	Neg	10.3463	Neg	8.43062	Neg	Neg	NIH 73	NIH	NoLyme	RapidPlasmaReagin	Neg	0.17	#NULL!	#NULL!	#NULL!	#NULL!	#NULL!	#NULL!	#NULL!	#NULL!	#NULL!	#NULL!	#NULL!	#NULL!	#NULL!	#NULL!	#NULL!	0
NIH 15								NIH 15	NoLyme	RapidPlasmaReaginFTA+	10.4318	Neg	12.5769	Neg	-0.298624	Neg	10.272	Neg	4.98281	Neg	Neg	NIH 15	NIH	NoLyme	RapidPlasmaReaginFTA+	Equiv	0.79	0	0	0	0	0	0	0	0	0	0	0	0	0	0	0	0
NIH 35								NIH 35	NoLyme	RapidPlasmaReaginFTA+	11.4578	Neg	13.5606	Neg	1.59284	Neg	9.42006	Neg	5.32204	Neg	Neg	NIH 35	NIH	NoLyme	RapidPlasmaReaginFTA+	Pos	1.71	0	0	0	0	0	0	0	0	0	0	0	0	0	0	0	0
NIH 42								NIH 42	NoLyme	RapidPlasmaReaginFTA+	17.5081	Neg	19.0435	Neg	-0.335706	Neg	11.7168	Neg	7.87224	Neg	Neg	NIH 42	NIH	NoLyme	RapidPlasmaReaginFTA+	Neg	0.67	#NULL!	#NULL!	#NULL!	#NULL!	#NULL!	#NULL!	#NULL!	#NULL!	#NULL!	#NULL!	#NULL!	#NULL!	#NULL!	#NULL!	#NULL!	0
NIH 48								NIH 48	NoLyme	RapidPlasmaReaginFTA+	12.9003	Neg	15.4919	Neg	0.984148	Neg	11.986	Neg	6.44174	Neg	Neg	NIH 48	NIH	NoLyme	RapidPlasmaReaginFTA+	Neg	0.69	#NULL!	#NULL!	#NULL!	#NULL!	#NULL!	#NULL!	#NULL!	#NULL!	#NULL!	#NULL!	#NULL!	#NULL!	#NULL!	#NULL!	#NULL!	0
NIH 57								NIH 57	NoLyme	RapidPlasmaReaginFTA+	5.36035	Neg	7.81472	Neg	-0.925698	Neg	10.0622	Neg	5.33009	Neg	Neg	NIH 57	NIH	NoLyme	RapidPlasmaReaginFTA+	Neg	0.017	#NULL!	#NULL!	#NULL!	#NULL!	#NULL!	#NULL!	#NULL!	#NULL!	#NULL!	#NULL!	#NULL!	#NULL!	#NULL!	#NULL!	#NULL!	0
NIH 69								NIH 69	NoLyme	RapidPlasmaReaginFTA+	7.96307	Neg	10.4671	Neg	1.6425	Neg	11.6551	Neg	6.99771	Neg	Neg	NIH 69	NIH	NoLyme	RapidPlasmaReaginFTA+	Equiv	0.91	0	0	0	0	0	0	0	0	0	0	0	0	0	0	0	0
002-01								002-01	NoLyme	RheumatoidArthritis	1.5186	Neg	1.70713	Neg	0.312831	Neg	-0.464755	Neg	-2.10996	Neg	Neg	002-01	CDC	NoLyme	RheumatoidArthritis	Neg	0.18	#NULL!	#NULL!	#NULL!	#NULL!	#NULL!	#NULL!	#NULL!	#NULL!	#NULL!	#NULL!	#NULL!	#NULL!	#NULL!	#NULL!	#NULL!	0
003-01								003-01	NoLyme	RheumatoidArthritis	3.65919	Neg	3.75562	Neg	-0.0381028	Neg	1.33963	Neg	-0.994844	Neg	Neg	003-01	CDC	NoLyme	RheumatoidArthritis	Neg	0.1	#NULL!	#NULL!	#NULL!	#NULL!	#NULL!	#NULL!	#NULL!	#NULL!	#NULL!	#NULL!	#NULL!	#NULL!	#NULL!	#NULL!	#NULL!	0
004-01								004-01	NoLyme	RheumatoidArthritis	-1.08774	Neg	-1.30102	Neg	-0.614637	Neg	-0.524901	Neg	-5.26944	Neg	Neg	004-01	CDC	NoLyme	RheumatoidArthritis	Neg	0.05	#NULL!	#NULL!	#NULL!	#NULL!	#NULL!	#NULL!	#NULL!	#NULL!	#NULL!	#NULL!	#NULL!	#NULL!	#NULL!	#NULL!	#NULL!	0
005-01								005-01	NoLyme	RheumatoidArthritis	0.0697972	Neg	0.304553	Neg	-0.464237	Neg	5.42957	Neg	-5.74734	Neg	Neg	005-01	CDC	NoLyme	RheumatoidArthritis	Neg	0.17	#NULL!	#NULL!	#NULL!	#NULL!	#NULL!	#NULL!	#NULL!	#NULL!	#NULL!	#NULL!	#NULL!	#NULL!	#NULL!	#NULL!	#NULL!	0
006-01								006-01	NoLyme	RheumatoidArthritis	-1.88049	Neg	-1.61476	Neg	-0.389037	Neg	-2.96082	Neg	-6.11904	Neg	Neg	006-01	CDC	NoLyme	RheumatoidArthritis	Neg	0.12	#NULL!	#NULL!	#NULL!	#NULL!	#NULL!	#NULL!	#NULL!	#NULL!	#NULL!	#NULL!	#NULL!	#NULL!	#NULL!	#NULL!	#NULL!	0
007-01								007-01	NoLyme	RheumatoidArthritis	-1.81723	Neg	-1.65167	Neg	-0.739971	Neg	8.37673	Neg	-5.34909	Neg	Neg	007-01	CDC	NoLyme	RheumatoidArthritis	Neg	0.06	#NULL!	#NULL!	#NULL!	#NULL!	#NULL!	#NULL!	#NULL!	#NULL!	#NULL!	#NULL!	#NULL!	#NULL!	#NULL!	#NULL!	#NULL!	0
008-01								008-01	NoLyme	RheumatoidArthritis	-1.57659	Neg	-1.37484	Neg	-0.664771	Neg	0.196853	Neg	-4.34018	Neg	Neg	008-01	CDC	NoLyme	RheumatoidArthritis	Neg	0.42	#NULL!	#NULL!	#NULL!	#NULL!	#NULL!	#NULL!	#NULL!	#NULL!	#NULL!	#NULL!	#NULL!	#NULL!	#NULL!	#NULL!	#NULL!	0
009-01								009-01	NoLyme	RheumatoidArthritis	3.91476	Neg	3.60798	Neg	3.39604	Neg	-1.39702	Neg	-2.48166	Neg	Neg	009-01	CDC	NoLyme	RheumatoidArthritis	Neg	0.15	#NULL!	#NULL!	#NULL!	#NULL!	#NULL!	#NULL!	#NULL!	#NULL!	#NULL!	#NULL!	#NULL!	#NULL!	#NULL!	#NULL!	#NULL!	0
010-01								010-01	NoLyme	RheumatoidArthritis	-0.00448446	Neg	0.0277299	Neg	0.413098	Neg	2.72299	Neg	-3.19852	Neg	Neg	010-01	CDC	NoLyme	RheumatoidArthritis	Neg	0.32	#NULL!	#NULL!	#NULL!	#NULL!	#NULL!	#NULL!	#NULL!	#NULL!	#NULL!	#NULL!	#NULL!	#NULL!	#NULL!	#NULL!	#NULL!	0
011-01								011-01	NoLyme	RheumatoidArthritis	-1.43905	Neg	-1.31948	Neg	-0.965571	Neg	2.54255	Neg	-5.34909	Neg	Neg	011-01	CDC	NoLyme	RheumatoidArthritis	Neg	0.19	#NULL!	#NULL!	#NULL!	#NULL!	#NULL!	#NULL!	#NULL!	#NULL!	#NULL!	#NULL!	#NULL!	#NULL!	#NULL!	#NULL!	#NULL!	0
012-01								012-01	NoLyme	RheumatoidArthritis	-1.42125	Neg	-1.15338	Neg	-0.639704	Neg	4.07628	Neg	-4.81808	Neg	Neg	012-01	CDC	NoLyme	RheumatoidArthritis	Neg	0.23	#NULL!	#NULL!	#NULL!	#NULL!	#NULL!	#NULL!	#NULL!	#NULL!	#NULL!	#NULL!	#NULL!	#NULL!	#NULL!	#NULL!	#NULL!	0
013-01								013-01	NoLyme	RheumatoidArthritis	-1.90824	Neg	-1.57785	Neg	-0.51437	Neg	0.106634	Neg	1.50054	Neg	Neg	013-01	CDC	NoLyme	RheumatoidArthritis	Neg	0.04	#NULL!	#NULL!	#NULL!	#NULL!	#NULL!	#NULL!	#NULL!	#NULL!	#NULL!	#NULL!	#NULL!	#NULL!	#NULL!	#NULL!	#NULL!	0
014-01								014-01	NoLyme	RheumatoidArthritis	0.861196	Neg	1.07966	Neg	3.29577	Neg	1.52007	Neg	3.77582	Neg	Neg	014-01	CDC	NoLyme	RheumatoidArthritis	Neg	0.12	#NULL!	#NULL!	#NULL!	#NULL!	#NULL!	#NULL!	#NULL!	#NULL!	#NULL!	#NULL!	#NULL!	#NULL!	#NULL!	#NULL!	#NULL!	0
016-01								016-01	NoLyme	RheumatoidArthritis	0.365899	Neg	0.489102	Neg	-0.689837	Neg	4.28679	Neg	0.728927	Neg	Neg	016-01	CDC	NoLyme	RheumatoidArthritis	Neg	0.35	#NULL!	#NULL!	#NULL!	#NULL!	#NULL!	#NULL!	#NULL!	#NULL!	#NULL!	#NULL!	#NULL!	#NULL!	#NULL!	#NULL!	#NULL!	0
017-01								017-01	NoLyme	RheumatoidArthritis	-1.66328	Neg	-1.48557	Neg	-1.21624	Neg	9.48943	Neg	1.04549	Neg	Neg	017-01	CDC	NoLyme	RheumatoidArthritis	Neg	0.12	#NULL!	#NULL!	#NULL!	#NULL!	#NULL!	#NULL!	#NULL!	#NULL!	#NULL!	#NULL!	#NULL!	#NULL!	#NULL!	#NULL!	#NULL!	0
019-01								019-01	NoLyme	RheumatoidArthritis	-0.437654	Neg	-0.378278	Neg	-1.19117	Neg	4.19657	Neg	2.92506	Neg	Neg	019-01	CDC	NoLyme	RheumatoidArthritis	Neg	0.28	#NULL!	#NULL!	#NULL!	#NULL!	#NULL!	#NULL!	#NULL!	#NULL!	#NULL!	#NULL!	#NULL!	#NULL!	#NULL!	#NULL!	#NULL!	0
020-01								020-01	NoLyme	RheumatoidArthritis	-2.28294	Neg	-2.14995	Neg	-1.26637	Neg	-2.20899	Neg	0.709142	Neg	Neg	020-01	CDC	NoLyme	RheumatoidArthritis	Neg	0.02	#NULL!	#NULL!	#NULL!	#NULL!	#NULL!	#NULL!	#NULL!	#NULL!	#NULL!	#NULL!	#NULL!	#NULL!	#NULL!	#NULL!	#NULL!	0
021-01								021-01	NoLyme	RheumatoidArthritis	-2.19464	Neg	-2.37141	Neg	-1.06584	Neg	-3.41191	Neg	0.313442	Neg	Neg	021-01	CDC	NoLyme	RheumatoidArthritis	Neg	0.02	#NULL!	#NULL!	#NULL!	#NULL!	#NULL!	#NULL!	#NULL!	#NULL!	#NULL!	#NULL!	#NULL!	#NULL!	#NULL!	#NULL!	#NULL!	0
022-01								022-01	NoLyme	RheumatoidArthritis	-1.90257	Neg	-1.79931	Neg	-1.19117	Neg	-2.20899	Neg	0.649787	Neg	Neg	022-01	CDC	NoLyme	RheumatoidArthritis	Neg	0.01	#NULL!	#NULL!	#NULL!	#NULL!	#NULL!	#NULL!	#NULL!	#NULL!	#NULL!	#NULL!	#NULL!	#NULL!	#NULL!	#NULL!	#NULL!	0
024-01								024-01	NoLyme	RheumatoidArthritis	-1.56502	Neg	-1.61476	Neg	-0.188503	Neg	0.738168	Neg	1.30269	Neg	Neg	024-01	CDC	NoLyme	RheumatoidArthritis	Neg	0.22	#NULL!	#NULL!	#NULL!	#NULL!	#NULL!	#NULL!	#NULL!	#NULL!	#NULL!	#NULL!	#NULL!	#NULL!	#NULL!	#NULL!	#NULL!	0
025-01								025-01	NoLyme	RheumatoidArthritis	-1.51143	Neg	-1.37484	Neg	-0.589571	Neg	-0.464755	Neg	0.689357	Neg	Neg	025-01	CDC	NoLyme	RheumatoidArthritis	Neg	0.16	#NULL!	#NULL!	#NULL!	#NULL!	#NULL!	#NULL!	#NULL!	#NULL!	#NULL!	#NULL!	#NULL!	#NULL!	#NULL!	#NULL!	#NULL!	0
027-01								027-01	NoLyme	RheumatoidArthritis	-2.38875	Neg	-2.20531	Neg	-0.765038	Neg	0.738168	Neg	0.867422	Neg	Neg	027-01	CDC	NoLyme	RheumatoidArthritis	Neg	0.04	#NULL!	#NULL!	#NULL!	#NULL!	#NULL!	#NULL!	#NULL!	#NULL!	#NULL!	#NULL!	#NULL!	#NULL!	#NULL!	#NULL!	#NULL!	0
028-01								028-01	NoLyme	RheumatoidArthritis	0.171024	Neg	-0.00917991	Neg	-0.21357	Neg	75.6502	1	3.24162	Neg	1	028-01	CDC	NoLyme	RheumatoidArthritis	Equiv	0.91	1	0	1	1	1	1	0	0	1	0	0	1	1	0	1	1
029-01								029-01	NoLyme	RheumatoidArthritis	-1.88884	Neg	-2.02076	Neg	-1.11597	Neg	5.85059	Neg	0.926777	Neg	Neg	029-01	CDC	NoLyme	RheumatoidArthritis	Neg	0.05	#NULL!	#NULL!	#NULL!	#NULL!	#NULL!	#NULL!	#NULL!	#NULL!	#NULL!	#NULL!	#NULL!	#NULL!	#NULL!	#NULL!	#NULL!	0
030-01								030-01	NoLyme	RheumatoidArthritis	-0.745288	Neg	-0.710466	Neg	-0.113303	Neg	20.857	Neg	4.92335	Neg	Neg	030-01	CDC	NoLyme	RheumatoidArthritis	Neg	0.49	#NULL!	#NULL!	#NULL!	#NULL!	#NULL!	#NULL!	#NULL!	#NULL!	#NULL!	#NULL!	#NULL!	#NULL!	#NULL!	#NULL!	#NULL!	0
031-01								031-01	NoLyme	RheumatoidArthritis	0.281659	Neg	0.526012	Neg	-0.21357	Neg	11.2036	Neg	4.19131	Neg	Neg	031-01	CDC	NoLyme	RheumatoidArthritis	Neg	0.24	#NULL!	#NULL!	#NULL!	#NULL!	#NULL!	#NULL!	#NULL!	#NULL!	#NULL!	#NULL!	#NULL!	#NULL!	#NULL!	#NULL!	#NULL!	0
032-01								032-01	NoLyme	RheumatoidArthritis	-1.81049	Neg	-1.92849	Neg	0.137364	Neg	-1.60753	Neg	0.333227	Neg	Neg	032-01	CDC	NoLyme	RheumatoidArthritis	Neg	0.12	#NULL!	#NULL!	#NULL!	#NULL!	#NULL!	#NULL!	#NULL!	#NULL!	#NULL!	#NULL!	#NULL!	#NULL!	#NULL!	#NULL!	#NULL!	0
033-01								033-01	NoLyme	RheumatoidArthritis	-2.19812	Neg	-2.11304	Neg	-0.790104	Neg	-2.35936	Neg	-0.0822586	Neg	Neg	033-01	CDC	NoLyme	RheumatoidArthritis	Neg	0.09	#NULL!	#NULL!	#NULL!	#NULL!	#NULL!	#NULL!	#NULL!	#NULL!	#NULL!	#NULL!	#NULL!	#NULL!	#NULL!	#NULL!	#NULL!	0
034-01								034-01	NoLyme	RheumatoidArthritis	-0.742908	Neg	-0.452098	Neg	-0.464237	Neg	0.377291	Neg	1.14441	Neg	Neg	034-01	CDC	NoLyme	RheumatoidArthritis	Neg	0.07	#NULL!	#NULL!	#NULL!	#NULL!	#NULL!	#NULL!	#NULL!	#NULL!	#NULL!	#NULL!	#NULL!	#NULL!	#NULL!	#NULL!	#NULL!	0
035-01								035-01	NoLyme	RheumatoidArthritis	-1.70685	Neg	-1.5963	Neg	0.513365	Neg	-3.2014	Neg	-0.0229036	Neg	Neg	035-01	CDC	NoLyme	RheumatoidArthritis	Neg	0.13	#NULL!	#NULL!	#NULL!	#NULL!	#NULL!	#NULL!	#NULL!	#NULL!	#NULL!	#NULL!	#NULL!	#NULL!	#NULL!	#NULL!	#NULL!	0
036-01								036-01	NoLyme	RheumatoidArthritis	-0.238433	Neg	-0.275998	Neg	0.928623	Neg	11.5682	Neg	1.46097	Neg	Neg	036-01	CDC	NoLyme	RheumatoidArthritis	Neg	0.48	#NULL!	#NULL!	#NULL!	#NULL!	#NULL!	#NULL!	#NULL!	#NULL!	#NULL!	#NULL!	#NULL!	#NULL!	#NULL!	#NULL!	#NULL!	0
037-01								037-01	NoLyme	RheumatoidArthritis	-0.158995	Neg	-0.23505	Neg	1.14491	Neg	4.30875	Neg	1.12463	Neg	Neg	037-01	CDC	NoLyme	RheumatoidArthritis	Neg	0.23	#NULL!	#NULL!	#NULL!	#NULL!	#NULL!	#NULL!	#NULL!	#NULL!	#NULL!	#NULL!	#NULL!	#NULL!	#NULL!	#NULL!	#NULL!	0
039-01								039-01	NoLyme	RheumatoidArthritis	-2.84835	Neg	-2.93765	Neg	0.688301	Neg	5.44846	Neg	0.432152	Neg	Neg	039-01	CDC	NoLyme	RheumatoidArthritis	Neg	0.04	#NULL!	#NULL!	#NULL!	#NULL!	#NULL!	#NULL!	#NULL!	#NULL!	#NULL!	#NULL!	#NULL!	#NULL!	#NULL!	#NULL!	#NULL!	0
040-01								040-01	NoLyme	RheumatoidArthritis	-2.4527	Neg	-2.69196	Neg	5.32651	Neg	7.604	Neg	2.98442	Neg	Neg	040-01	CDC	NoLyme	RheumatoidArthritis	Neg	0.19	#NULL!	#NULL!	#NULL!	#NULL!	#NULL!	#NULL!	#NULL!	#NULL!	#NULL!	#NULL!	#NULL!	#NULL!	#NULL!	#NULL!	#NULL!	0
041-01								041-01	NoLyme	RheumatoidArthritis	-1.75839	Neg	-1.95489	Neg	0.568141	Neg	8.66938	Neg	1.12463	Neg	Neg	041-01	CDC	NoLyme	RheumatoidArthritis	Neg	0.07	#NULL!	#NULL!	#NULL!	#NULL!	#NULL!	#NULL!	#NULL!	#NULL!	#NULL!	#NULL!	#NULL!	#NULL!	#NULL!	#NULL!	#NULL!	0
042-01								042-01	NoLyme	RheumatoidArthritis	-2.89648	Neg	-2.8967	Neg	0.736366	Neg	6.7616	Neg	0.313442	Neg	Neg	042-01	CDC	NoLyme	RheumatoidArthritis	Neg	0.21	#NULL!	#NULL!	#NULL!	#NULL!	#NULL!	#NULL!	#NULL!	#NULL!	#NULL!	#NULL!	#NULL!	#NULL!	#NULL!	#NULL!	#NULL!	0
043-01								043-01	NoLyme	RheumatoidArthritis	-3.00962	Neg	-3.30619	Neg	0.496044	Neg	8.91714	Neg	2.23259	Neg	Neg	043-01	CDC	NoLyme	RheumatoidArthritis	Neg	0.07	#NULL!	#NULL!	#NULL!	#NULL!	#NULL!	#NULL!	#NULL!	#NULL!	#NULL!	#NULL!	#NULL!	#NULL!	#NULL!	#NULL!	#NULL!	0
044-01								044-01	NoLyme	RheumatoidArthritis	0.861676	Neg	0.215384	Neg	1.86588	Neg	10.9983	Neg	5.08163	Neg	Neg	044-01	CDC	NoLyme	RheumatoidArthritis	Neg	0.22	#NULL!	#NULL!	#NULL!	#NULL!	#NULL!	#NULL!	#NULL!	#NULL!	#NULL!	#NULL!	#NULL!	#NULL!	#NULL!	#NULL!	#NULL!	0
045-01								045-01	NoLyme	RheumatoidArthritis	7.67851	Neg	7.17663	Neg	1.09685	Neg	7.13325	Neg	2.39087	Neg	Neg	045-01	CDC	NoLyme	RheumatoidArthritis	Neg	0.1	#NULL!	#NULL!	#NULL!	#NULL!	#NULL!	#NULL!	#NULL!	#NULL!	#NULL!	#NULL!	#NULL!	#NULL!	#NULL!	#NULL!	#NULL!	0
046-01								046-01	NoLyme	RheumatoidArthritis	-2.81643	Neg	-3.04002	Neg	1.09685	Neg	9.41267	Neg	1.28291	Neg	Neg	046-01	CDC	NoLyme	RheumatoidArthritis	Neg	0.22	#NULL!	#NULL!	#NULL!	#NULL!	#NULL!	#NULL!	#NULL!	#NULL!	#NULL!	#NULL!	#NULL!	#NULL!	#NULL!	#NULL!	#NULL!	0
047-01								047-01	NoLyme	RheumatoidArthritis	-2.33716	Neg	-2.69196	Neg	0.520076	Neg	2.20276	Neg	-0.102044	Neg	Neg	047-01	CDC	NoLyme	RheumatoidArthritis	Neg	0.1	#NULL!	#NULL!	#NULL!	#NULL!	#NULL!	#NULL!	#NULL!	#NULL!	#NULL!	#NULL!	#NULL!	#NULL!	#NULL!	#NULL!	#NULL!	0
048-01								048-01	NoLyme	RheumatoidArthritis	-1.87995	Neg	-2.07773	Neg	0.544108	Neg	4.97771	Neg	1.14441	Neg	Neg	048-01	CDC	NoLyme	RheumatoidArthritis	Neg	0.22	#NULL!	#NULL!	#NULL!	#NULL!	#NULL!	#NULL!	#NULL!	#NULL!	#NULL!	#NULL!	#NULL!	#NULL!	#NULL!	#NULL!	#NULL!	0
049-01								049-01	NoLyme	RheumatoidArthritis	2.94412	Neg	3.10225	Neg	0.616205	Neg	7.25713	Neg	0.550862	Neg	Neg	049-01	CDC	NoLyme	RheumatoidArthritis	Neg	0.15	#NULL!	#NULL!	#NULL!	#NULL!	#NULL!	#NULL!	#NULL!	#NULL!	#NULL!	#NULL!	#NULL!	#NULL!	#NULL!	#NULL!	#NULL!	0
050-01								050-01	NoLyme	RheumatoidArthritis	0.837715	Neg	0.891034	Neg	0.952656	Neg	3.78845	Neg	0.649787	Neg	Neg	050-01	CDC	NoLyme	RheumatoidArthritis	Neg	0.04	#NULL!	#NULL!	#NULL!	#NULL!	#NULL!	#NULL!	#NULL!	#NULL!	#NULL!	#NULL!	#NULL!	#NULL!	#NULL!	#NULL!	#NULL!	0
051-01								051-01	NoLyme	RheumatoidArthritis	-2.21857	Neg	-2.28247	Neg	0.375883	Neg	7.67832	Neg	1.0257	Neg	Neg	051-01	CDC	NoLyme	RheumatoidArthritis	Neg	0.09	#NULL!	#NULL!	#NULL!	#NULL!	#NULL!	#NULL!	#NULL!	#NULL!	#NULL!	#NULL!	#NULL!	#NULL!	#NULL!	#NULL!	#NULL!	0
052-01								052-01	NoLyme	RheumatoidArthritis	-2.66235	Neg	-2.73291	Neg	0.327819	Neg	7.72788	Neg	1.44119	Neg	Neg	052-01	CDC	NoLyme	RheumatoidArthritis	Neg	0.06	#NULL!	#NULL!	#NULL!	#NULL!	#NULL!	#NULL!	#NULL!	#NULL!	#NULL!	#NULL!	#NULL!	#NULL!	#NULL!	#NULL!	#NULL!	0
054-01								054-01	NoLyme	RheumatoidArthritis	-2.43837	Neg	-2.61006	Neg	0.760398	Neg	8.81803	Neg	0.728927	Neg	Neg	054-01	CDC	NoLyme	RheumatoidArthritis	Neg	0.04	#NULL!	#NULL!	#NULL!	#NULL!	#NULL!	#NULL!	#NULL!	#NULL!	#NULL!	#NULL!	#NULL!	#NULL!	#NULL!	#NULL!	#NULL!	0
055-01								055-01	NoLyme	RheumatoidArthritis	-3.20972	Neg	-3.51093	Neg	1.07282	Neg	4.95293	Neg	0.0760215	Neg	Neg	055-01	CDC	NoLyme	RheumatoidArthritis	Neg	0.06	#NULL!	#NULL!	#NULL!	#NULL!	#NULL!	#NULL!	#NULL!	#NULL!	#NULL!	#NULL!	#NULL!	#NULL!	#NULL!	#NULL!	#NULL!	0
056-01								056-01	NoLyme	RheumatoidArthritis	-4.38147	Neg	-4.82128	Neg	1.96201	Neg	8.29773	Neg	-0.102044	Neg	Neg	056-01	CDC	NoLyme	RheumatoidArthritis	Neg	0.04	#NULL!	#NULL!	#NULL!	#NULL!	#NULL!	#NULL!	#NULL!	#NULL!	#NULL!	#NULL!	#NULL!	#NULL!	#NULL!	#NULL!	#NULL!	0
057-01								057-01	NoLyme	RheumatoidArthritis	-4.14019	Neg	-4.75986	Neg	0.423947	Neg	4.90338	Neg	0.471722	Neg	Neg	057-01	CDC	NoLyme	RheumatoidArthritis	Neg	0.46	#NULL!	#NULL!	#NULL!	#NULL!	#NULL!	#NULL!	#NULL!	#NULL!	#NULL!	#NULL!	#NULL!	#NULL!	#NULL!	#NULL!	#NULL!	0
058-01								058-01	NoLyme	RheumatoidArthritis	0.686109	Neg	0.317755	Neg	3.50007	Neg	8.84281	Neg	-0.616454	Neg	Neg	058-01	CDC	NoLyme	RheumatoidArthritis	Neg	0.07	#NULL!	#NULL!	#NULL!	#NULL!	#NULL!	#NULL!	#NULL!	#NULL!	#NULL!	#NULL!	#NULL!	#NULL!	#NULL!	#NULL!	#NULL!	0
059-01								059-01	NoLyme	RheumatoidArthritis	-0.664255	Neg	-0.849277	Neg	1.69765	Neg	9.75953	Neg	6.42701	Neg	Neg	059-01	CDC	NoLyme	RheumatoidArthritis	Neg	0.06	#NULL!	#NULL!	#NULL!	#NULL!	#NULL!	#NULL!	#NULL!	#NULL!	#NULL!	#NULL!	#NULL!	#NULL!	#NULL!	#NULL!	#NULL!	0
060-01								060-01	NoLyme	RheumatoidArthritis	1.47448	Neg	1.21862	Neg	1.60152	Neg	6.41473	Neg	3.24162	Neg	Neg	060-01	CDC	NoLyme	RheumatoidArthritis	Neg	0.17	#NULL!	#NULL!	#NULL!	#NULL!	#NULL!	#NULL!	#NULL!	#NULL!	#NULL!	#NULL!	#NULL!	#NULL!	#NULL!	#NULL!	#NULL!	0
061-01								061-01	NoLyme	RheumatoidArthritis	-2.74865	Neg	-3.01955	Neg	2.01007	Neg	3.78845	Neg	1.34226	Neg	Neg	061-01	CDC	NoLyme	RheumatoidArthritis	Neg	0.17	#NULL!	#NULL!	#NULL!	#NULL!	#NULL!	#NULL!	#NULL!	#NULL!	#NULL!	#NULL!	#NULL!	#NULL!	#NULL!	#NULL!	#NULL!	0
062-01								062-01	NoLyme	RheumatoidArthritis	-1.40901	Neg	-1.36113	Neg	1.5054	Neg	11.1222	Neg	4.30885	Neg	Neg	062-01	CDC	NoLyme	RheumatoidArthritis	Neg	0.21	#NULL!	#NULL!	#NULL!	#NULL!	#NULL!	#NULL!	#NULL!	#NULL!	#NULL!	#NULL!	#NULL!	#NULL!	#NULL!	#NULL!	#NULL!	0
063-01								063-01	NoLyme	RheumatoidArthritis	-3.50623	Neg	-3.57235	Neg	0.544108	Neg	9.80909	Neg	7.90161	Neg	Neg	063-01	CDC	NoLyme	RheumatoidArthritis	Neg	0.29	#NULL!	#NULL!	#NULL!	#NULL!	#NULL!	#NULL!	#NULL!	#NULL!	#NULL!	#NULL!	#NULL!	#NULL!	#NULL!	#NULL!	#NULL!	0
064-01								064-01	NoLyme	RheumatoidArthritis	-3.19746	Neg	-3.24476	Neg	2.05814	Neg	23.4113	Neg	2.60229	Neg	Neg	064-01	CDC	NoLyme	RheumatoidArthritis	Neg	0.54	#NULL!	#NULL!	#NULL!	#NULL!	#NULL!	#NULL!	#NULL!	#NULL!	#NULL!	#NULL!	#NULL!	#NULL!	#NULL!	#NULL!	#NULL!	0
065-01								065-01	NoLyme	RheumatoidArthritis	-2.5823	Neg	-2.85575	Neg	1.31314	Neg	9.85864	Neg	2.42265	Neg	Neg	065-01	CDC	NoLyme	RheumatoidArthritis	Neg	0.21	#NULL!	#NULL!	#NULL!	#NULL!	#NULL!	#NULL!	#NULL!	#NULL!	#NULL!	#NULL!	#NULL!	#NULL!	#NULL!	#NULL!	#NULL!	0
066-01								066-01	NoLyme	RheumatoidArthritis	-2.52439	Neg	-2.61006	Neg	0.568141	Neg	21.3053	Neg	3.10528	Neg	Neg	066-01	CDC	NoLyme	RheumatoidArthritis	Neg	0.67	#NULL!	#NULL!	#NULL!	#NULL!	#NULL!	#NULL!	#NULL!	#NULL!	#NULL!	#NULL!	#NULL!	#NULL!	#NULL!	#NULL!	#NULL!	0
067-01								067-01	NoLyme	RheumatoidArthritis	-2.75133	Neg	-3.12192	Neg	0.568141	Neg	9.73476	Neg	2.29691	Neg	Neg	067-01	CDC	NoLyme	RheumatoidArthritis	Neg	0.08	#NULL!	#NULL!	#NULL!	#NULL!	#NULL!	#NULL!	#NULL!	#NULL!	#NULL!	#NULL!	#NULL!	#NULL!	#NULL!	#NULL!	#NULL!	0
068-01								068-01	NoLyme	RheumatoidArthritis	-1.65418	Neg	-1.95489	Neg	2.05814	Neg	4.80427	Neg	1.36279	Neg	Neg	068-01	CDC	NoLyme	RheumatoidArthritis	Neg	0.04	#NULL!	#NULL!	#NULL!	#NULL!	#NULL!	#NULL!	#NULL!	#NULL!	#NULL!	#NULL!	#NULL!	#NULL!	#NULL!	#NULL!	#NULL!	0
069-01								069-01	NoLyme	RheumatoidArthritis	2.43573	Neg	1.75095	Neg	1.57749	Neg	14.8387	Neg	6.5184	Neg	Neg	069-01	CDC	NoLyme	RheumatoidArthritis	Neg	0.1	#NULL!	#NULL!	#NULL!	#NULL!	#NULL!	#NULL!	#NULL!	#NULL!	#NULL!	#NULL!	#NULL!	#NULL!	#NULL!	#NULL!	#NULL!	0
070-01								070-01	NoLyme	RheumatoidArthritis	2.58336	Neg	2.05807	Neg	3.21168	Neg	30.2991	Neg	5.24297	Neg	Neg	070-01	CDC	NoLyme	RheumatoidArthritis	Neg	0.4	#NULL!	#NULL!	#NULL!	#NULL!	#NULL!	#NULL!	#NULL!	#NULL!	#NULL!	#NULL!	#NULL!	#NULL!	#NULL!	#NULL!	#NULL!	0
071-01								071-01	NoLyme	RheumatoidArthritis	51.9936	1	53.5303	1	2.53878	Neg	12.7079	Neg	8.47645	Neg	Neg	071-01	CDC	NoLyme	RheumatoidArthritis	Neg	0.71	#NULL!	#NULL!	#NULL!	#NULL!	#NULL!	#NULL!	#NULL!	#NULL!	#NULL!	#NULL!	#NULL!	#NULL!	#NULL!	#NULL!	#NULL!	0
072-01								072-01	NoLyme	RheumatoidArthritis	-0.836858	Neg	-1.03355	Neg	0.78443	Neg	22.7671	Neg	6.44654	Neg	Neg	072-01	CDC	NoLyme	RheumatoidArthritis	Neg	0.23	#NULL!	#NULL!	#NULL!	#NULL!	#NULL!	#NULL!	#NULL!	#NULL!	#NULL!	#NULL!	#NULL!	#NULL!	#NULL!	#NULL!	#NULL!	0
073-01								073-01	NoLyme	RheumatoidArthritis	-2.4921	Neg	-2.73291	Neg	5.42264	Neg	6.36518	Neg	2.92564	Neg	Neg	073-01	CDC	NoLyme	RheumatoidArthritis	Neg	0.1	#NULL!	#NULL!	#NULL!	#NULL!	#NULL!	#NULL!	#NULL!	#NULL!	#NULL!	#NULL!	#NULL!	#NULL!	#NULL!	#NULL!	#NULL!	0
074-01								074-01	NoLyme	RheumatoidArthritis	-1.22296	Neg	-1.36113	Neg	0.688301	Neg	3.19381	Neg	1.36279	Neg	Neg	074-01	CDC	NoLyme	RheumatoidArthritis	Neg	0.14	#NULL!	#NULL!	#NULL!	#NULL!	#NULL!	#NULL!	#NULL!	#NULL!	#NULL!	#NULL!	#NULL!	#NULL!	#NULL!	#NULL!	#NULL!	0
075-01								075-01	NoLyme	RheumatoidArthritis	-2.26248	Neg	-2.30295	Neg	0.616205	Neg	22.891	Neg	8.58423	Neg	Neg	075-01	CDC	NoLyme	RheumatoidArthritis	Neg	0.24	#NULL!	#NULL!	#NULL!	#NULL!	#NULL!	#NULL!	#NULL!	#NULL!	#NULL!	#NULL!	#NULL!	#NULL!	#NULL!	#NULL!	#NULL!	0
076-01								076-01	NoLyme	RheumatoidArthritis	-2.81314	Neg	-2.93765	Neg	1.14491	Neg	7.08369	Neg	2.08134	Neg	Neg	076-01	CDC	NoLyme	RheumatoidArthritis	Neg	0.73	#NULL!	#NULL!	#NULL!	#NULL!	#NULL!	#NULL!	#NULL!	#NULL!	#NULL!	#NULL!	#NULL!	#NULL!	#NULL!	#NULL!	#NULL!	0
077-01								077-01	NoLyme	RheumatoidArthritis	-1.73992	Neg	-1.77062	Neg	0.496044	Neg	8.04997	Neg	2.36876	Neg	Neg	077-01	CDC	NoLyme	RheumatoidArthritis	Neg	0.25	#NULL!	#NULL!	#NULL!	#NULL!	#NULL!	#NULL!	#NULL!	#NULL!	#NULL!	#NULL!	#NULL!	#NULL!	#NULL!	#NULL!	#NULL!	0
078-01								078-01	NoLyme	RheumatoidArthritis	0.540917	Neg	0.636408	Neg	-1.50586	Neg	9.94415	Neg	2.90768	Neg	Neg	078-01	CDC	NoLyme	RheumatoidArthritis	Neg	0.54	#NULL!	#NULL!	#NULL!	#NULL!	#NULL!	#NULL!	#NULL!	#NULL!	#NULL!	#NULL!	#NULL!	#NULL!	#NULL!	#NULL!	#NULL!	0
079-01								079-01	NoLyme	RheumatoidArthritis	2.21639	Neg	2.52519	Neg	-0.467757	Neg	16.3265	Neg	6.85971	Neg	Neg	079-01	CDC	NoLyme	RheumatoidArthritis	Pos	1.27	0	0	0	0	0	1	0	0	0	0	0	0	1	0	0	0
080-01								080-01	NoLyme	RheumatoidArthritis	1.78107	Neg	2.09347	Neg	-1.32863	Neg	10.3834	Neg	1.56039	Neg	Neg	080-01	CDC	NoLyme	RheumatoidArthritis	Neg	0.11	#NULL!	#NULL!	#NULL!	#NULL!	#NULL!	#NULL!	#NULL!	#NULL!	#NULL!	#NULL!	#NULL!	#NULL!	#NULL!	#NULL!	#NULL!	0
081-01								081-01	NoLyme	RheumatoidArthritis	4.88921	Neg	5.16948	Neg	0.241194	Neg	14.3369	Neg	6.33876	Neg	Neg	081-01	CDC	NoLyme	RheumatoidArthritis	Neg	0.19	#NULL!	#NULL!	#NULL!	#NULL!	#NULL!	#NULL!	#NULL!	#NULL!	#NULL!	#NULL!	#NULL!	#NULL!	#NULL!	#NULL!	#NULL!	0
082-01								082-01	NoLyme	RheumatoidArthritis	4.09959	Neg	4.19811	Neg	1.55782	Neg	25.4738	Neg	6.78785	Neg	Neg	082-01	CDC	NoLyme	RheumatoidArthritis	Neg	0.24	#NULL!	#NULL!	#NULL!	#NULL!	#NULL!	#NULL!	#NULL!	#NULL!	#NULL!	#NULL!	#NULL!	#NULL!	#NULL!	#NULL!	#NULL!	0
083-01								083-01	NoLyme	RheumatoidArthritis	3.19405	Neg	3.46059	Neg	1.20334	Neg	9.29816	Neg	1.68614	Neg	Neg	083-01	CDC	NoLyme	RheumatoidArthritis	Neg	0.18	#NULL!	#NULL!	#NULL!	#NULL!	#NULL!	#NULL!	#NULL!	#NULL!	#NULL!	#NULL!	#NULL!	#NULL!	#NULL!	#NULL!	#NULL!	0
084-01								084-01	NoLyme	RheumatoidArthritis	18.3998	Neg	18.5888	Neg	1.0261	Neg	8.16122	Neg	1.86578	Neg	Neg	084-01	CDC	NoLyme	RheumatoidArthritis	Equiv	0.8	0	0	0	0	1	1	0	0	0	1	1	0	0	0	0	0
085-01								085-01	NoLyme	RheumatoidArthritis	4.03589	Neg	4.2161	Neg	1.76037	Neg	11.0294	Neg	2.65618	Neg	Neg	085-01	CDC	NoLyme	RheumatoidArthritis	Neg	0.38	#NULL!	#NULL!	#NULL!	#NULL!	#NULL!	#NULL!	#NULL!	#NULL!	#NULL!	#NULL!	#NULL!	#NULL!	#NULL!	#NULL!	#NULL!	0
086-01								086-01	NoLyme	RheumatoidArthritis	3.53051	Neg	3.42461	Neg	-0.746274	Neg	15.0087	Neg	4.66813	Neg	Neg	086-01	CDC	NoLyme	RheumatoidArthritis	Neg	0.37	#NULL!	#NULL!	#NULL!	#NULL!	#NULL!	#NULL!	#NULL!	#NULL!	#NULL!	#NULL!	#NULL!	#NULL!	#NULL!	#NULL!	#NULL!	0
087-01								087-01	NoLyme	RheumatoidArthritis	5.72339	Neg	5.96097	Neg	-0.695634	Neg	7.85114	Neg	2.36876	Neg	Neg	087-01	CDC	NoLyme	RheumatoidArthritis	Neg	0.08	#NULL!	#NULL!	#NULL!	#NULL!	#NULL!	#NULL!	#NULL!	#NULL!	#NULL!	#NULL!	#NULL!	#NULL!	#NULL!	#NULL!	#NULL!	0
087-02								087-02	NoLyme	RheumatoidArthritis	9.47208	Neg	9.68457	Neg	-1.20203	Neg	6.68836	Neg	0.895731	Neg	Neg	087-02	CDC	NoLyme	RheumatoidArthritis	Neg	0.11	#NULL!	#NULL!	#NULL!	#NULL!	#NULL!	#NULL!	#NULL!	#NULL!	#NULL!	#NULL!	#NULL!	#NULL!	#NULL!	#NULL!	#NULL!	0
088-01								088-01	NoLyme	RheumatoidArthritis	0.93063	Neg	1.28399	Neg	-0.644995	Neg	8.23874	Neg	1.43464	Neg	Neg	088-01	CDC	NoLyme	RheumatoidArthritis	Neg	0.23	#NULL!	#NULL!	#NULL!	#NULL!	#NULL!	#NULL!	#NULL!	#NULL!	#NULL!	#NULL!	#NULL!	#NULL!	#NULL!	#NULL!	#NULL!	0
089-01								089-01	NoLyme	RheumatoidArthritis	1.08142	Neg	1.33796	Neg	-1.20203	Neg	6.27492	Neg	1.75799	Neg	Neg	089-01	CDC	NoLyme	RheumatoidArthritis	Neg	0.07	#NULL!	#NULL!	#NULL!	#NULL!	#NULL!	#NULL!	#NULL!	#NULL!	#NULL!	#NULL!	#NULL!	#NULL!	#NULL!	#NULL!	#NULL!	0
090-01								090-01	NoLyme	RheumatoidArthritis	1.66465	Neg	1.8956	Neg	-1.12607	Neg	7.72194	Neg	1.32686	Neg	Neg	090-01	CDC	NoLyme	RheumatoidArthritis	Neg	0.2	#NULL!	#NULL!	#NULL!	#NULL!	#NULL!	#NULL!	#NULL!	#NULL!	#NULL!	#NULL!	#NULL!	#NULL!	#NULL!	#NULL!	#NULL!	0
091-01								091-01	NoLyme	RheumatoidArthritis	1.88442	Neg	2.16542	Neg	1.12738	Neg	19.9699	Neg	6.0693	Neg	Neg	091-01	CDC	NoLyme	RheumatoidArthritis	Equiv	0.91	0	0	0	0	0	0	0	0	0	0	0	0	1	0	0	0
092-01								092-01	NoLyme	RheumatoidArthritis	3.50141	Neg	3.64047	Neg	0.0892758	Neg	23.8976	Neg	5.26093	Neg	Neg	092-01	CDC	NoLyme	RheumatoidArthritis	Neg	0.23	#NULL!	#NULL!	#NULL!	#NULL!	#NULL!	#NULL!	#NULL!	#NULL!	#NULL!	#NULL!	#NULL!	#NULL!	#NULL!	#NULL!	#NULL!	0
093-01								093-01	NoLyme	RheumatoidArthritis	3.63858	Neg	3.87432	Neg	1.55782	Neg	12.6056	Neg	4.05736	Neg	Neg	093-01	CDC	NoLyme	RheumatoidArthritis	Neg	0.48	#NULL!	#NULL!	#NULL!	#NULL!	#NULL!	#NULL!	#NULL!	#NULL!	#NULL!	#NULL!	#NULL!	#NULL!	#NULL!	#NULL!	#NULL!	0
094-01								094-01	NoLyme	RheumatoidArthritis	1.02161	Neg	1.35594	Neg	-1.10075	Neg	9.55656	Neg	1.41668	Neg	Neg	094-01	CDC	NoLyme	RheumatoidArthritis	Neg	0.03	#NULL!	#NULL!	#NULL!	#NULL!	#NULL!	#NULL!	#NULL!	#NULL!	#NULL!	#NULL!	#NULL!	#NULL!	#NULL!	#NULL!	#NULL!	0
095-01								095-01	NoLyme	RheumatoidArthritis	0.792428	Neg	1.05014	Neg	-0.771593	Neg	13.355	Neg	1.7041	Neg	Neg	095-01	CDC	NoLyme	RheumatoidArthritis	Neg	0.05	#NULL!	#NULL!	#NULL!	#NULL!	#NULL!	#NULL!	#NULL!	#NULL!	#NULL!	#NULL!	#NULL!	#NULL!	#NULL!	#NULL!	#NULL!	0
096-01								096-01	NoLyme	RheumatoidArthritis	4.02276	Neg	4.14414	Neg	-0.417118	Neg	17.7477	Neg	3.60826	Neg	Neg	096-01	CDC	NoLyme	RheumatoidArthritis	Neg	0.14	#NULL!	#NULL!	#NULL!	#NULL!	#NULL!	#NULL!	#NULL!	#NULL!	#NULL!	#NULL!	#NULL!	#NULL!	#NULL!	#NULL!	#NULL!	0
097-01								097-01	NoLyme	RheumatoidArthritis	1.03342	Neg	1.30198	Neg	-0.594356	Neg	7.02427	Neg	0.931659	Neg	Neg	097-01	CDC	NoLyme	RheumatoidArthritis	Neg	0.12	#NULL!	#NULL!	#NULL!	#NULL!	#NULL!	#NULL!	#NULL!	#NULL!	#NULL!	#NULL!	#NULL!	#NULL!	#NULL!	#NULL!	#NULL!	0
099-01								099-01	NoLyme	RheumatoidArthritis	2.24421	Neg	2.39927	Neg	6.52047	Neg	10.616	Neg	1.93763	Neg	Neg	099-01	CDC	NoLyme	RheumatoidArthritis	Neg	0.06	#NULL!	#NULL!	#NULL!	#NULL!	#NULL!	#NULL!	#NULL!	#NULL!	#NULL!	#NULL!	#NULL!	#NULL!	#NULL!	#NULL!	#NULL!	0
100-01								100-01	NoLyme	RheumatoidArthritis	-0.38948	Neg	-0.0111738	Neg	-0.0879619	Neg	8.96225	Neg	2.1532	Neg	Neg	100-01	CDC	NoLyme	RheumatoidArthritis	Neg	0.09	#NULL!	#NULL!	#NULL!	#NULL!	#NULL!	#NULL!	#NULL!	#NULL!	#NULL!	#NULL!	#NULL!	#NULL!	#NULL!	#NULL!	#NULL!	0
101-01								101-01	NoLyme	RheumatoidArthritis	21.3461	Neg	22.1685	Neg	-1.12607	Neg	7.25683	Neg	2.02745	Neg	Neg	101-01	CDC	NoLyme	RheumatoidArthritis	Neg	0.15	#NULL!	#NULL!	#NULL!	#NULL!	#NULL!	#NULL!	#NULL!	#NULL!	#NULL!	#NULL!	#NULL!	#NULL!	#NULL!	#NULL!	#NULL!	0
NIH 10								NIH 10	NoLyme	RheumatoidFactor	9.26815	Neg	11.5157	Neg	4.09832	Neg	5.95329	Neg	2.85379	Neg	Neg	NIH 10	NIH	NoLyme	RheumatoidFactor	Neg	0.4	#NULL!	#NULL!	#NULL!	#NULL!	#NULL!	#NULL!	#NULL!	#NULL!	#NULL!	#NULL!	#NULL!	#NULL!	#NULL!	#NULL!	#NULL!	0
NIH 2								NIH 2	NoLyme	RheumatoidFactor	13.851	Neg	15.6424	Neg	2.03059	Neg	5.39496	Neg	3.03016	Neg	Neg	NIH 2	NIH	NoLyme	RheumatoidFactor	Neg	0.17	#NULL!	#NULL!	#NULL!	#NULL!	#NULL!	#NULL!	#NULL!	#NULL!	#NULL!	#NULL!	#NULL!	#NULL!	#NULL!	#NULL!	#NULL!	0
NIH 20								NIH 20	NoLyme	RheumatoidFactor	10.0725	Neg	12.2704	Neg	4.02538	Neg	15.6695	Neg	5.85744	Neg	Neg	NIH 20	NIH	NoLyme	RheumatoidFactor	Neg	0.13	#NULL!	#NULL!	#NULL!	#NULL!	#NULL!	#NULL!	#NULL!	#NULL!	#NULL!	#NULL!	#NULL!	#NULL!	#NULL!	#NULL!	#NULL!	0
NIH 29								NIH 29	NoLyme	RheumatoidFactor	8.54565	Neg	10.6267	Neg	-1.41426	Neg	8.37201	Neg	6.30361	Neg	Neg	NIH 29	NIH	NoLyme	RheumatoidFactor	Neg	0.19	#NULL!	#NULL!	#NULL!	#NULL!	#NULL!	#NULL!	#NULL!	#NULL!	#NULL!	#NULL!	#NULL!	#NULL!	#NULL!	#NULL!	#NULL!	0
NIH 30								NIH 30	NoLyme	RheumatoidFactor	7.37322	Neg	9.27553	Neg	-2.69345	Neg	22.0801	Neg	5.24736	Neg	Neg	NIH 30	NIH	NoLyme	RheumatoidFactor	Neg	0.11	#NULL!	#NULL!	#NULL!	#NULL!	#NULL!	#NULL!	#NULL!	#NULL!	#NULL!	#NULL!	#NULL!	#NULL!	#NULL!	#NULL!	#NULL!	0
NIH 46								NIH 46	NoLyme	RheumatoidFactor	15.9014	Neg	17.373	Neg	0.254285	Neg	6.13558	Neg	3.04509	Neg	Neg	NIH 46	NIH	NoLyme	RheumatoidFactor	Neg	0.03	#NULL!	#NULL!	#NULL!	#NULL!	#NULL!	#NULL!	#NULL!	#NULL!	#NULL!	#NULL!	#NULL!	#NULL!	#NULL!	#NULL!	#NULL!	0
NIH 47								NIH 47	NoLyme	RheumatoidFactor	16.475	Neg	17.7384	Neg	-0.058063	Neg	5.46879	Neg	2.63368	Neg	Neg	NIH 47	NIH	NoLyme	RheumatoidFactor	Neg	0.14	#NULL!	#NULL!	#NULL!	#NULL!	#NULL!	#NULL!	#NULL!	#NULL!	#NULL!	#NULL!	#NULL!	#NULL!	#NULL!	#NULL!	#NULL!	0
NIH 49								NIH 49	NoLyme	RheumatoidFactor	18.025	Neg	19.7221	Neg	9.24298	Neg	9.19786	Neg	5.32153	Neg	Neg	NIH 49	NIH	NoLyme	RheumatoidFactor	Neg	0.09	#NULL!	#NULL!	#NULL!	#NULL!	#NULL!	#NULL!	#NULL!	#NULL!	#NULL!	#NULL!	#NULL!	#NULL!	#NULL!	#NULL!	#NULL!	0
NIH 50								NIH 50	NoLyme	RheumatoidFactor	16.6516	Neg	18.0516	Neg	-0.613349	Neg	7.54324	Neg	3.37421	Neg	Neg	NIH 50	NIH	NoLyme	RheumatoidFactor	Neg	0.12	#NULL!	#NULL!	#NULL!	#NULL!	#NULL!	#NULL!	#NULL!	#NULL!	#NULL!	#NULL!	#NULL!	#NULL!	#NULL!	#NULL!	#NULL!	0
NIH 51								NIH 51	NoLyme	RheumatoidFactor	6.81179	Neg	9.5404	Neg	-0.925698	Neg	7.81489	Neg	4.53951	Neg	Neg	NIH 51	NIH	NoLyme	RheumatoidFactor	Neg	0.27	#NULL!	#NULL!	#NULL!	#NULL!	#NULL!	#NULL!	#NULL!	#NULL!	#NULL!	#NULL!	#NULL!	#NULL!	#NULL!	#NULL!	#NULL!	0
NIH 54								NIH 54	NoLyme	RheumatoidFactor	5.85295	Neg	8.6456	Neg	2.71837	Neg	15.199	Neg	5.62655	Neg	Neg	NIH 54	NIH	NoLyme	RheumatoidFactor	Pos	1	0	0	1	1	0	1	0	0	0	0	0	0	0	0	0	0
NIH 56								NIH 56	NoLyme	RheumatoidFactor	6.27151	Neg	9.02909	Neg	4.55775	Neg	11.2476	Neg	5.8242	Neg	Neg	NIH 56	NIH	NoLyme	RheumatoidFactor	Pos	1.03	0	0	0	0	0	0	0	0	0	0	0	0	1	0	0	0
NIH 61								NIH 61	NoLyme	RheumatoidFactor	5.92087	Neg	8.45386	Neg	-0.821581	Neg	5.86392	Neg	4.41599	Neg	Neg	NIH 61	NIH	NoLyme	RheumatoidFactor	Neg	0.1	#NULL!	#NULL!	#NULL!	#NULL!	#NULL!	#NULL!	#NULL!	#NULL!	#NULL!	#NULL!	#NULL!	#NULL!	#NULL!	#NULL!	#NULL!	0
NIH 7								NIH 7	NoLyme	RheumatoidFactor	10.6019	Neg	12.4983	Neg	-1.8733	Neg	26.6925	Neg	4.11357	Neg	Neg	NIH 7	NIH	NoLyme	RheumatoidFactor	Neg	0.23	#NULL!	#NULL!	#NULL!	#NULL!	#NULL!	#NULL!	#NULL!	#NULL!	#NULL!	#NULL!	#NULL!	#NULL!	#NULL!	#NULL!	#NULL!	0
NIH 9								NIH 9	NoLyme	RheumatoidFactor	8.92387	Neg	11.0048	Neg	1.65757	Neg	10.2072	Neg	5.6127	Neg	Neg	NIH 9	NIH	NoLyme	RheumatoidFactor	Neg	0.23	#NULL!	#NULL!	#NULL!	#NULL!	#NULL!	#NULL!	#NULL!	#NULL!	#NULL!	#NULL!	#NULL!	#NULL!	#NULL!	#NULL!	#NULL!	0
Syph 1001								Syph 1001	NoLyme	Syphilis	0.352704	Neg	-0.373284	Neg	4.47681	Neg	11.2994	Neg	8.90247	Neg	Neg	Syph 1001	UCLA	NoLyme	Syphilis	Pos	2.29	0	0	0	0	0	1	0	0	0	0	0	0	0	0	0	0
Syph 1017								Syph 1017	NoLyme	Syphilis	1.70774	Neg	1.28783	Neg	3.49651	Neg	4.10235	Neg	8.80923	Neg	Neg	Syph 1017	UCLA	NoLyme	Syphilis	Pos	1.84	0	0	0	0	0	0	0	0	0	0	0	0	0	0	0	0
Syph 1027								Syph 1027	NoLyme	Syphilis	4.69062	Neg	4.13143	Neg	4.72188	Neg	8.26484	Neg	2.99752	Neg	Neg	Syph 1027	UCLA	NoLyme	Syphilis	Neg	0.37	#NULL!	#NULL!	#NULL!	#NULL!	#NULL!	#NULL!	#NULL!	#NULL!	#NULL!	#NULL!	#NULL!	#NULL!	#NULL!	#NULL!	#NULL!	0
Syph 1036								Syph 1036	NoLyme	Syphilis	0.671243	Neg	0.105342	Neg	4.32364	Neg	21.3968	Neg	4.58253	Neg	Neg	Syph 1036	UCLA	NoLyme	Syphilis	Pos	1.46	0	0	0	0	1	1	0	0	0	0	0	0	0	0	0	0
Syph 2093								Syph 2093	NoLyme	Syphilis	0.993862	Neg	0.47135	Neg	19.3651	1	2.92074	Neg	7.59716	Neg	Neg	Syph 2093	UCLA	NoLyme	Syphilis	Equiv	0.94	0	0	0	0	0	0	0	0	0	0	0	0	0	0	0	0
Syph 2168								Syph 2168	NoLyme	Syphilis	0.897669	Neg	0.274269	Neg	6.62122	Neg	2.35679	Neg	5.98107	Neg	Neg	Syph 2168	UCLA	NoLyme	Syphilis	Pos	1.48	0	0	0	0	0	0	0	0	0	0	0	0	0	0	0	0
Syph 2172								Syph 2172	NoLyme	Syphilis	-0.0870124	Neg	-0.682983	Neg	3.89475	Neg	3.43098	Neg	11.1091	Neg	Neg	Syph 2172	UCLA	NoLyme	Syphilis	Neg	0.39	#NULL!	#NULL!	#NULL!	#NULL!	#NULL!	#NULL!	#NULL!	#NULL!	#NULL!	#NULL!	#NULL!	#NULL!	#NULL!	#NULL!	#NULL!	0
Syph 722								Syph 722	NoLyme	Syphilis	-0.0467688	Neg	-0.85191	Neg	4.17046	Neg	0.557526	Neg	4.769	Neg	Neg	Syph 722	UCLA	NoLyme	Syphilis	Equiv	0.95	0	0	0	0	0	1	0	0	0	0	0	0	0	0	0	0					e
Syph 724								Syph 724	NoLyme	Syphilis	4.1736	Neg	3.5965	Neg	4.81379	Neg	7.08323	Neg	10.7983	Neg	Neg	Syph 724	UCLA	NoLyme	Syphilis	Pos	2.84	0	0	0	0	0	0	0	0	0	0	0	0	0	0	0	0
Syph 934								Syph 934	NoLyme	Syphilis	-0.158556	Neg	-0.767447	Neg	3.83349	Neg	2.62534	Neg	5.94999	Neg	Neg	Syph 934	UCLA	NoLyme	Syphilis	Neg	0.54	#NULL!	#NULL!	#NULL!	#NULL!	#NULL!	#NULL!	#NULL!	#NULL!	#NULL!	#NULL!	#NULL!	#NULL!	#NULL!	#NULL!	#NULL!	0
Syph 941								Syph 941	NoLyme	Syphilis	-0.0994208	Neg	-0.682983	Neg	4.04793	Neg	9.82242	Neg	5.94999	Neg	Neg	Syph 941	UCLA	NoLyme	Syphilis	Pos	1.86	0	0	0	0	0	0	0	0	0	0	0	0	0	0	0	0
Syph 948								Syph 948	NoLyme	Syphilis	9.69904	Neg	9.39631	Neg	5.21204	Neg	9.4196	Neg	16.2992	Neg	Neg	Syph 948	UCLA	NoLyme	Syphilis	Equiv	0.98	0	0	0	1	0	1	0	0	0	0	0	0	0	0	0	0
Syph 987								Syph 987	NoLyme	Syphilis	2.01717	Neg	1.37229	Neg	4.2011	Neg	7.37863	Neg	13.0049	Neg	Neg	Syph 987	UCLA	NoLyme	Syphilis	Pos	1.65	0	0	1	0	0	1	0	0	0	0	0	0	0	0	0	0
Syph 996								Syph 996	NoLyme	Syphilis	-0.283926	Neg	-0.908219	Neg	4.17046	Neg	13.9312	Neg	11.2644	Neg	Neg	Syph 996	UCLA	NoLyme	Syphilis	Pos	3.58	0	0	0	0	0	1	0	0	0	0	0	0	0	0	0	0
00-0199								00-0199	NoLyme	TBRF	0.757316	Neg	-1.32057	Neg	-0.746274	Neg	5.83955	Neg	1.51111	Neg	Neg	00-0199	CDC	NoLyme	TBRF	Neg	0.15	#NULL!	#NULL!	#NULL!	#NULL!	#NULL!	#NULL!	#NULL!	#NULL!	#NULL!	#NULL!	#NULL!	#NULL!	#NULL!	#NULL!	#NULL!	0
00-0786								00-0786	NoLyme	TBRF	3.34039	Neg	1.46699	Neg	0.848866	Neg	23.8673	Neg	1.40809	Neg	Neg	00-0786	CDC	NoLyme	TBRF	Neg	0.34	#NULL!	#NULL!	#NULL!	#NULL!	#NULL!	#NULL!	#NULL!	#NULL!	#NULL!	#NULL!	#NULL!	#NULL!	#NULL!	#NULL!	#NULL!	0
00-0899								00-0899	NoLyme	TBRF	-0.584303	Neg	-2.56343	Neg	-0.315839	Neg	4.10061	Neg	1.40809	Neg	Neg	00-0899	CDC	NoLyme	TBRF	Equiv	0.79	0	0	0	0	0	1	0	0	0	0	0	0	0	0	0	0
00-1330								00-1330	NoLyme	TBRF	-1.92802	Neg	-3.93058	Neg	-0.847552	Neg	24.4616	Neg	-0.480619	Neg	Neg	00-1330	CDC	NoLyme	TBRF	Pos	4.09	0	0	0	1	0	0	0	0	0	0	0	0	0	0	1	0
00-1331								00-1331	NoLyme	TBRF	-1.38136	Neg	-3.39793	Neg	-0.923511	Neg	27.5873	Neg	7.24593	Neg	Neg	00-1331	CDC	NoLyme	TBRF	Pos	2.06	0	0	0	0	0	0	0	0	0	1	0	0	0	0	0	0
98-2296								98-2296	NoLyme	TBRF	-0.77262	Neg	-2.77649	Neg	1.1527	Neg	60.6492	1	11.7788	Neg	Neg	98-2296	CDC	NoLyme	TBRF	Pos	2.93	0	0	0	0	0	0	0	0	0	0	0	0	0	0	1	0
98-3070								98-3070	NoLyme	TBRF	0.421675	Neg	-1.56914	Neg	0.494391	Neg	4.34274	Neg	3.33115	Neg	Neg	98-3070	CDC	NoLyme	TBRF	Neg	0.34	#NULL!	#NULL!	#NULL!	#NULL!	#NULL!	#NULL!	#NULL!	#NULL!	#NULL!	#NULL!	#NULL!	#NULL!	#NULL!	#NULL!	#NULL!	0
99-0451								99-0451	NoLyme	TBRF	1.8272	Neg	-0.113217	Neg	1.6591	Neg	2.0535	Neg	3.02208	Neg	Neg	99-0451	CDC	NoLyme	TBRF	Pos	3.44	0	0	1	1	1	1	0	0	0	0	0	0	1	0	0	0
99-2488								99-2488	NoLyme	TBRF	-1.54806	Neg	-3.4867	Neg	0.823546	Neg	9.00926	Neg	7.07423	Neg	1	99-2488	CDC	NoLyme	TBRF	Pos	3.6	0	0	0	0	0	1	0	0	0	0	0	1	1	1	0	1
99-2547								99-2547	NoLyme	TBRF	5.86225	Neg	4.2368	Neg	4.77342	Neg	7.20429	Neg	15.6936	Neg	Neg	99-2547	CDC	NoLyme	TBRF	Neg	0.47	#NULL!	#NULL!	#NULL!	#NULL!	#NULL!	#NULL!	#NULL!	#NULL!	#NULL!	#NULL!	#NULL!	#NULL!	#NULL!	#NULL!	#NULL!	0
99-2926								99-2926	NoLyme	TBRF	10.756	Neg	9.08397	Neg	37.3345	1	14.2261	Neg	1.64848	Neg	1	99-2926	CDC	NoLyme	TBRF	Pos	2.37	0	0	1	1	0	1	0	0	0	0	0	1	1	1	1	1
99-2969								99-2969	NoLyme	TBRF	-0.501864	Neg	-2.52792	Neg	-0.23988	Neg	2.64782	Neg	-2.30065	Neg	Neg	99-2969	CDC	NoLyme	TBRF	Neg	0.19	#NULL!	#NULL!	#NULL!	#NULL!	#NULL!	#NULL!	#NULL!	#NULL!	#NULL!	#NULL!	#NULL!	#NULL!	#NULL!	#NULL!	#NULL!	0
99-3227								99-3227	NoLyme	TBRF	8.45804	Neg	6.84681	Neg	2.97572	Neg	33.1343	Neg	-0.583639	Neg	Neg	99-3227	CDC	NoLyme	TBRF	Pos	1.27	0	0	0	0	0	1	0	0	0	0	0	0	0	0	1	0
99-3899								99-3899	NoLyme	TBRF	-0.471243	Neg	-2.52792	Neg	-0.670315	Neg	11.7828	Neg	11.4354	Neg	Neg	99-3899	CDC	NoLyme	TBRF	Neg	0.27	#NULL!	#NULL!	#NULL!	#NULL!	#NULL!	#NULL!	#NULL!	#NULL!	#NULL!	#NULL!	#NULL!	#NULL!	#NULL!	#NULL!	#NULL!	0
NOTE1: #NULL! = test not performed. Except for specimens 90-0874 to 90-0877, Western blots were performed only on samples positive or equivocal by VIDAS EIA. Alll Western blot results were reported in part in Columns C through G, and in full in Columns AC through AR.
NOTE 2: Database from Bacon R, Biggerstaff B, Schriefer ME, et al. Serodiagnosis of Lyme disease by kinetic enzyme-linked immunsorbent assay using recombinant VlsE1 or peptide antigens of Borrelia burgdorferi compared with 2-tiered testing using whole-cell lysates. Journal of Infectious Diseases 2003;187:1187-99. PMID 12695997
NOTE 3: Data provided with the permission of the Division of Vector-Borne Diseases, Centers for Disease Control and Prevention, Fort Collins, Colorado, USA. Data was collated and annotated by Richard Porwancher, M.D., and Lisa Landsberg, M.Ed.
NOTE 4: Column AB: Reading1 = VIDAS EIA index value, with values <0.75 interpreted as negative, 0.75 to 0.99 as equivocal, and values greater than or equal to 1.0 as positive. See text for full description of VIDAS EIA.
Column A: ID1= sample identification number
Column B: VIDAS1 = index value of VIDAS EIA for New York Medical College serum samples C (early-acute-phase sera) and D (early-convalescent-phase sera). VIDAS1 index values <0.75 are negative, 0.75 to 0.99 are equivocal, and values greater than or equal to 1.0 are positive.
Column C: Mbands= IgM Western blot bands related to New York Medical College serum samples C and D.Western blotting was performed only on sera positive or equivocal by VIDAS EIA.
Column D: MblotPN1 = positive or negative interpretation of IgM Western blot band pattern from Column C according to CDC-advocated guidelines (see text)
Column E: Gbands= IgG Western blot bands related to New York Medical College serum samples C and D. Western blotting was performed only on sera positive or equivocal by VIDAS EIA.
Column F: GBlotPN1= positive or negative interpreation of IgG Western blot band pattern from Column E according to CDC-advocated guidelines (see text)
Column G: Tier2PN1 = overall interpretation, either positive or negative, of VIDAS EIA, IgG Western blot, and IgM Western blot results from Columns B, D, and F, according to CDC-advocated standard 2-tiered guidelines (see text).
Column H: samptype= early-acute-phase C sera from New York Medical College C samples are labeled as (1) and early-convalescent-phase D sera from New York Medical College are labeled as (2).
Column I: duplicate of Column A, included for ease of comparison to juxtaposed data
Column J: Status1= either serum sample from patient with Lyme disease (Lyme) or control sample (NoLyme)
Column K: Class1= source of serum sample analyzed, either from patients with Lyme disease or controls. See text for specimen description.
Column L: VlsE30G2 = VlsE1-IgG antibody by kinetic-EIA with reaction velocity recorded over 30 minutes. These samples were not used for our analyses, but are included for completeness of the existing database.
Column M: vlse3Ng2 = positive or negative interpretation of results from Column L. Negative result was labeled "Neg" and positive result was labeled "1". These samples were not used for our analyses.
Column N: Vlse10G2 = VlsE1-IgG antibody by kinetic-EIA with reaction velocity recorded over 10 minutes. Cutoff slope is 24.86.
Column O: vlse1Ng2 = positive or negative interpretation of results from Column N. Negative result was labeled "Neg" and positive result was labeled "1".
Column P: C610G2 = C6-IgG antibody by kinetic-EIA with reaction velocity recorded over 10 minutes. Cutoff slope is 9.67.
Column Q: c61Neg2= positive or negative interpretation of results from Column P. Negative result was labeled "Neg" and positive result was labeled "1".
Column R: PepC10M2 = pepC10-IgM antibody by kinetic-EIA with reaction velocity recorded over 10 minutes. Cutoff slope is 55.73.
Column S: pepc1Ng2 = positive or negative interpreation of results from Column R. Negative result was labeled "Neg" and positive result was labeled "1".
Column T: VlsE10M2 = VlsE1-IgM antibody by kinetic-EIA with reaction velocity recorded over 10 minutes. Cutoff slope is 19.60.
Column U: vls1NgM2 = positive or negative interpretation of results from Column T. Negative result was labeled "Neg" and positive result was labeled "1".
Column V: Tier2PN1 = overall interpretation, either positive or negative, of VIDAS EIA (Column AA), IgG Western blot (Column AC), and IgM Western blot (Column AN) according to CDC-advocated standard 2-tiered guidelines (see text). Positive results were labeled "1" and negative results "0".
Column W: Duplicate of Column A
Column X: Lab1 = Laboratory contributing individual serum sample
Column Y: Duplicate of Column J
Column Z: Duplicate of Column K
Column AA: VIDAS1 = IgG and IgM antibodies to whole-cell antigen by VIDAS EIA, interpreted as either positive (Pos), negative (Neg), or equivocal (Equiv). See text for full description of VIDAS EIA.
Column AB: Reading1 = the VIDAS EIA index value for each sample, interpeted as per Note 4 above.
Column AC: GBlotPN1 = IgG Western blot interpretation, either positive or negative, of band pattern listed in Columns AD through AM. Positive results were labeled "1" and negative results labeled "0".
Columns AD through AM: IgG Western blot bands, either positive or negative. Positive results were labeled "1" and negative results "0".
Column AN: MBlotPN1 = IgM Western blot interpretation, eithe positive or negative.Positive results were labeled "1" and negative results were labeled "0".
Columns AO to AQ: IgM Western blot bands, either positive or negative. Positive results were labeled "1" and negative results labeled "0".
Column AR: Duplicate of Column V.
